# Supplementary material
Source: MDPI journal article supplement (https://www.mdpi.com/1996-1073/14/13/3814)

## Global-local heat demand development for the energy transition time frame up to 2050

Dominik Keiner <sup>1,\*</sup>, Larissa D.S.N.S. Barbosa <sup>2</sup>, Dmitrii Bogdanov <sup>1</sup>, Arman Aghahosseini <sup>1</sup>, Ashish Gulagi <sup>1</sup>, Solomon Oyewo <sup>1</sup>, Michael Child <sup>1</sup>, Siavash Khalili <sup>1</sup> and Christian Breyer <sup>1,\*</sup>

<sup>1</sup> School of Energy Systems, LUT University, Yliopistonkatu 34, 53850 Lappeenranta, Finland

<sup>2</sup> Luiz De Queiroz College of Agriculture, University of São Paulo, Piracicaba, São Paulo, Brazil

\* Correspondence: dominik.keiner@lut.fi (D.K.); christian.breyer@lut.fi (C.B.)

### Part 3: Total cumulative heat composition for 9 major regions and 145 meso regions

Part 3.1. Total cumulative heat composition for 9 major regions of the LUT model.

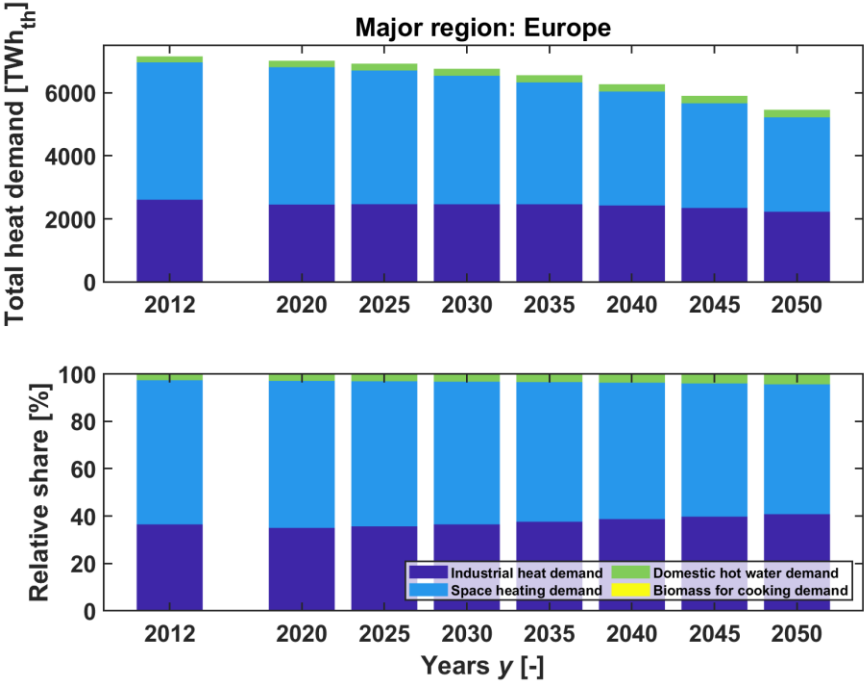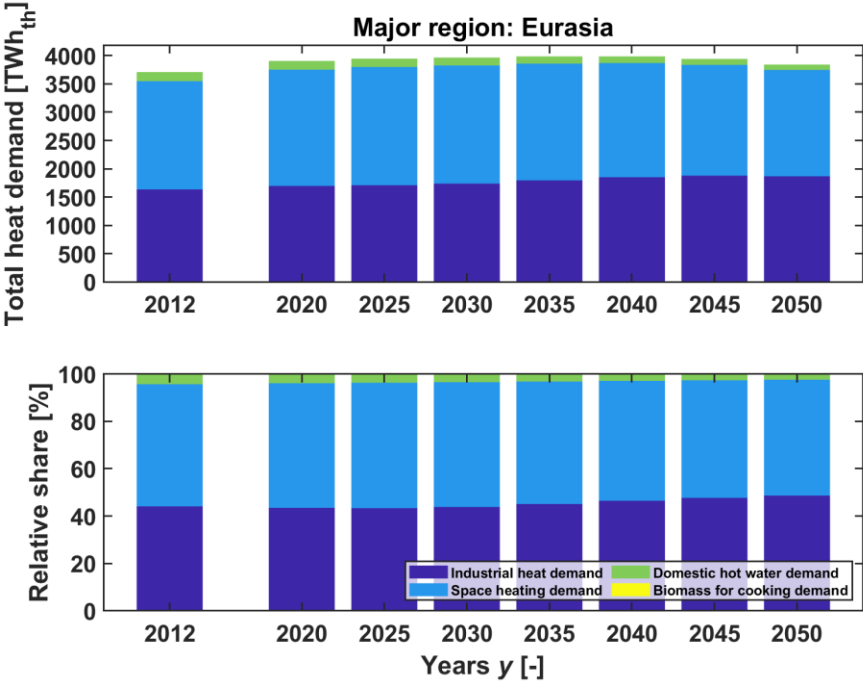

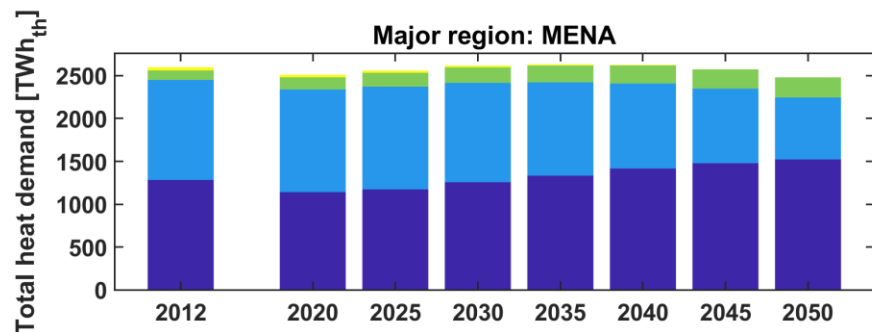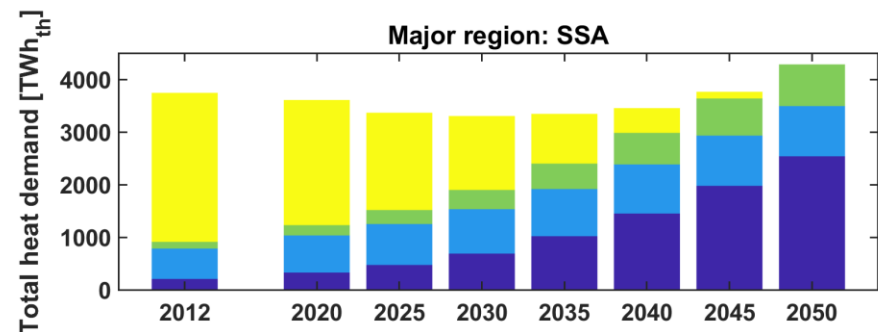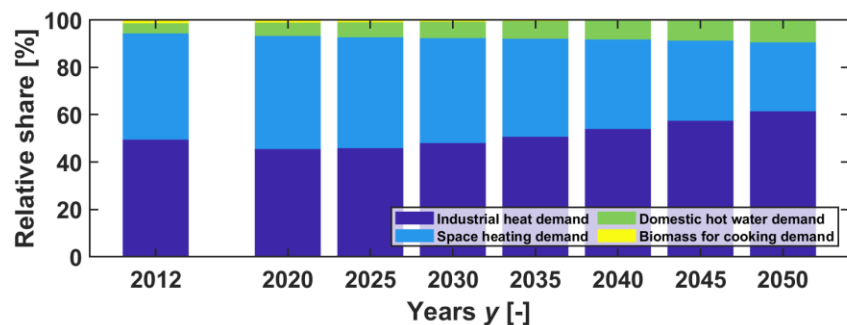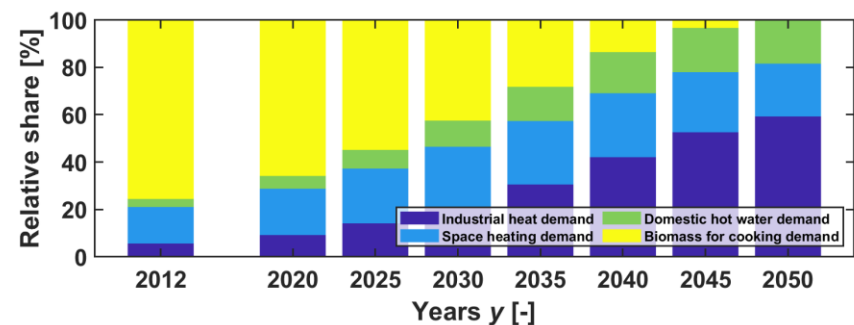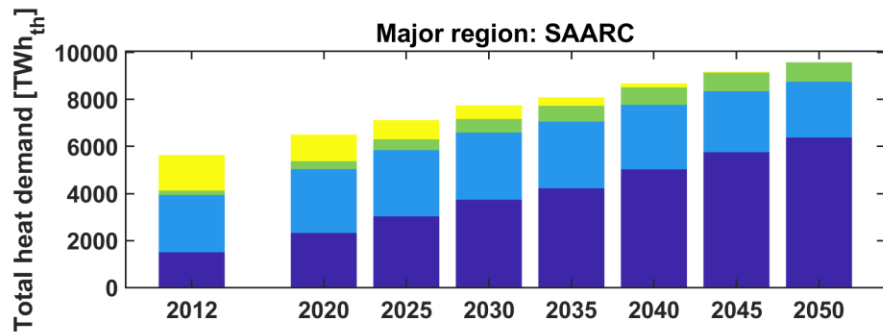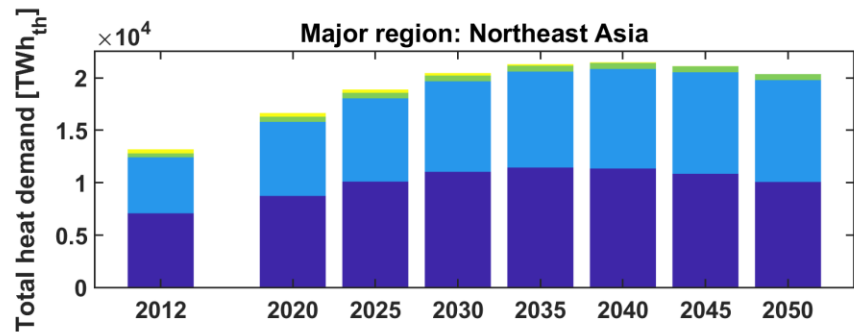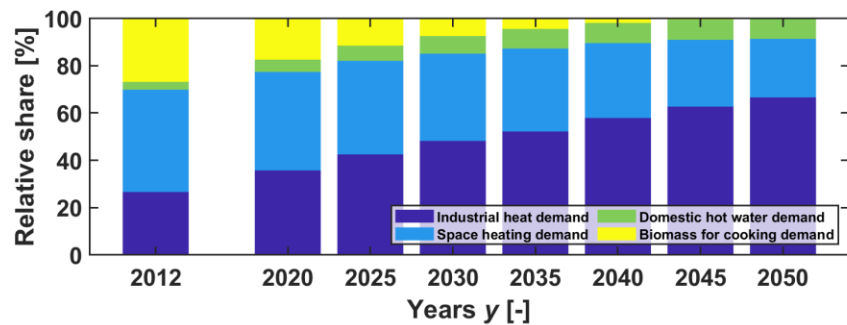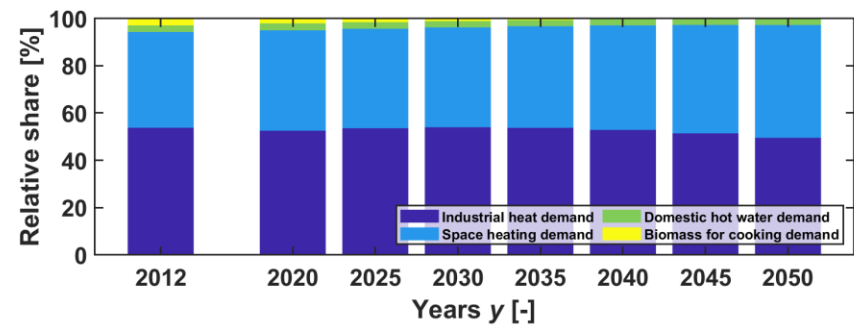

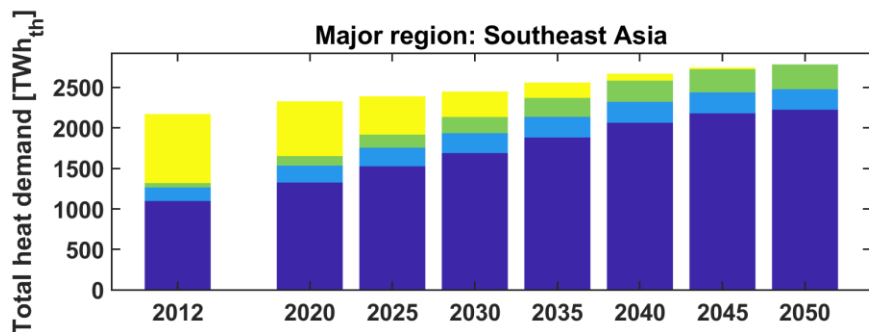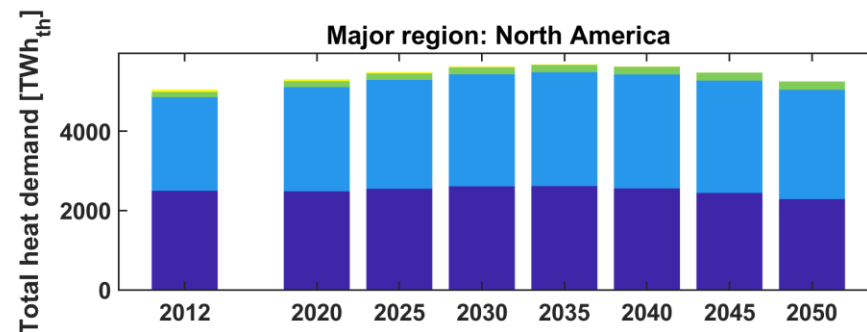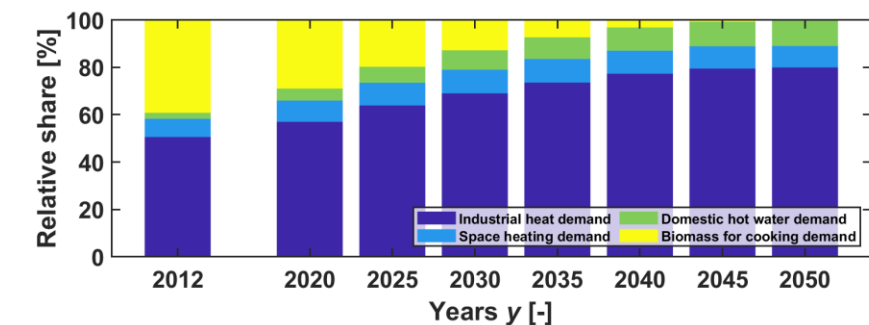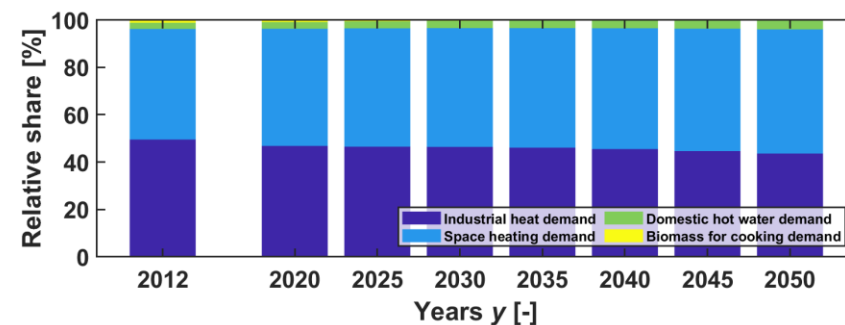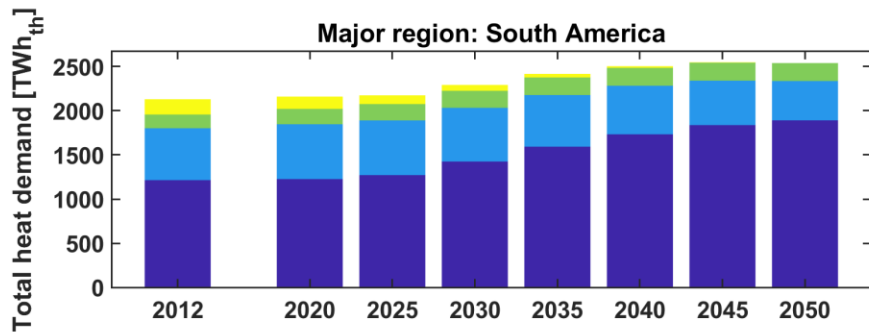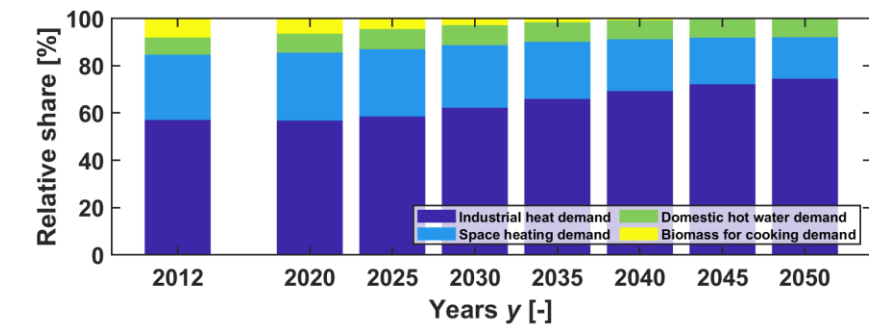



Part 3.2. Total cumulative heat composition for 145 meso regions of the LUT model.

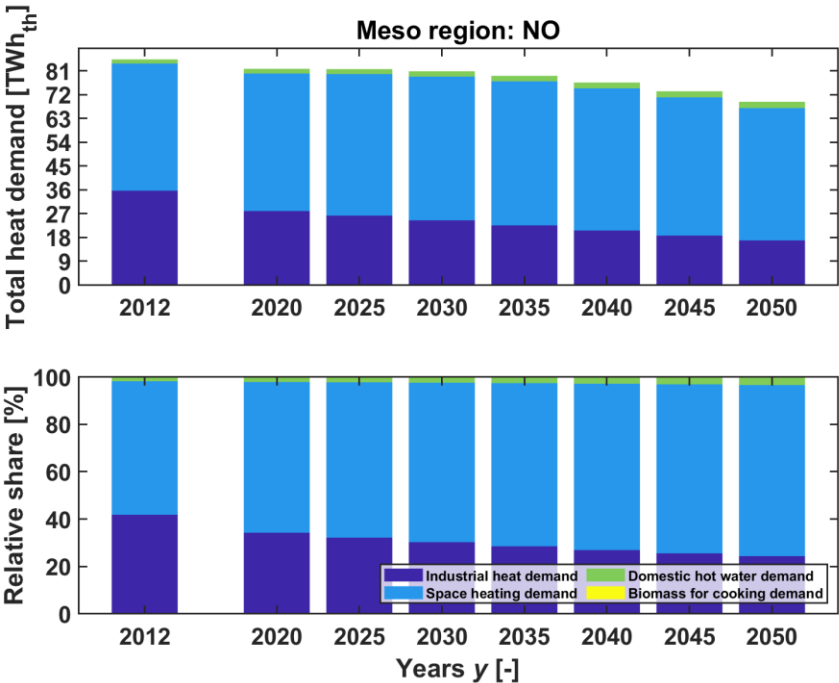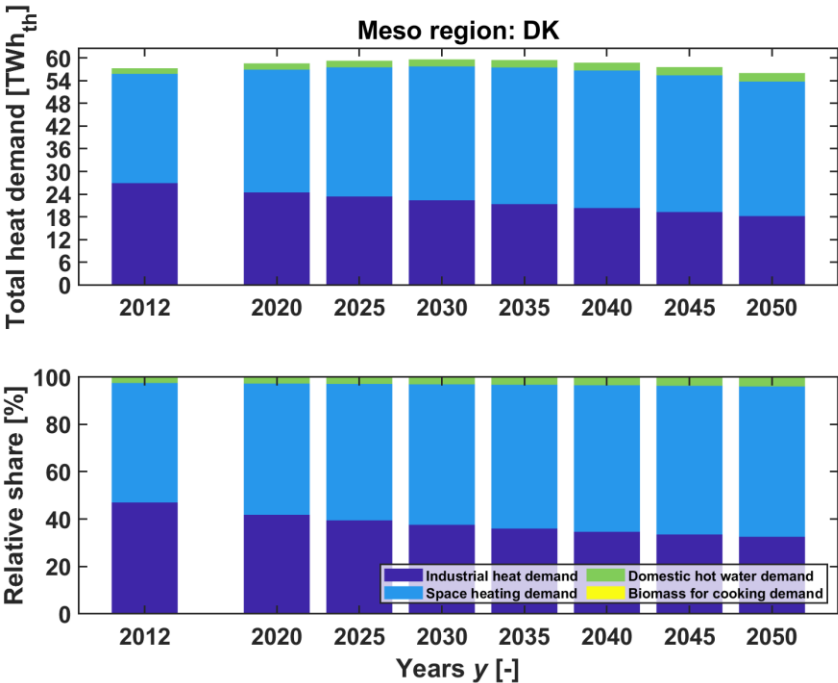

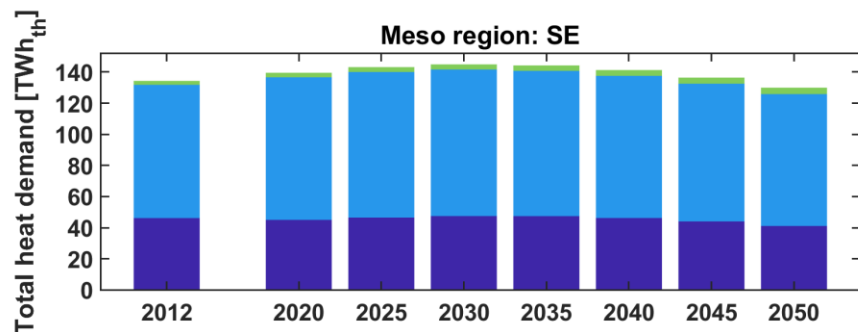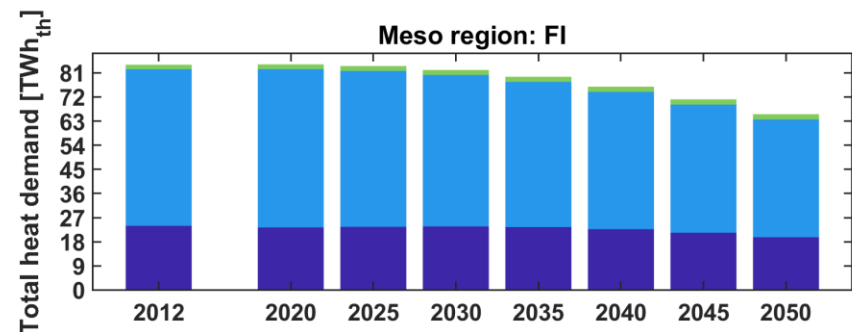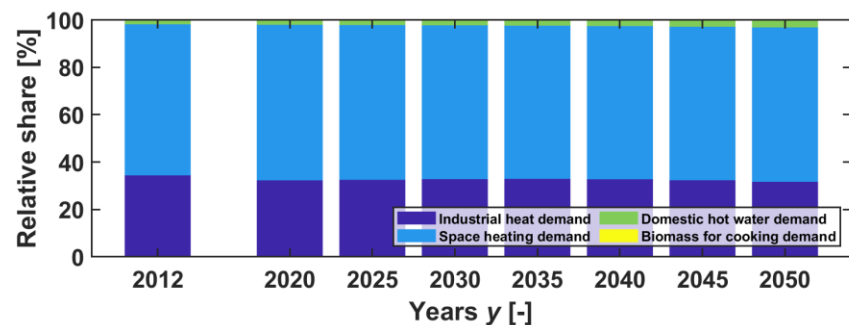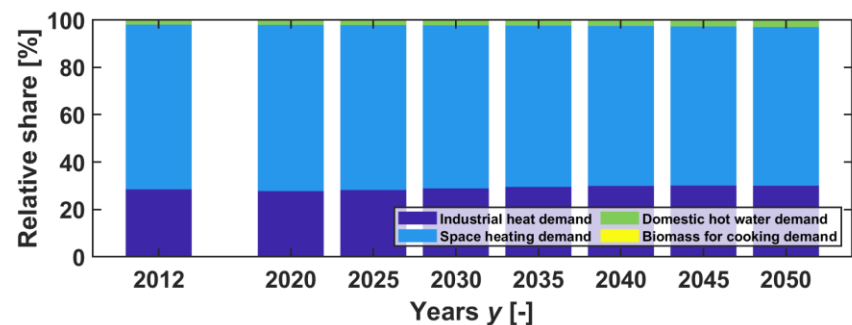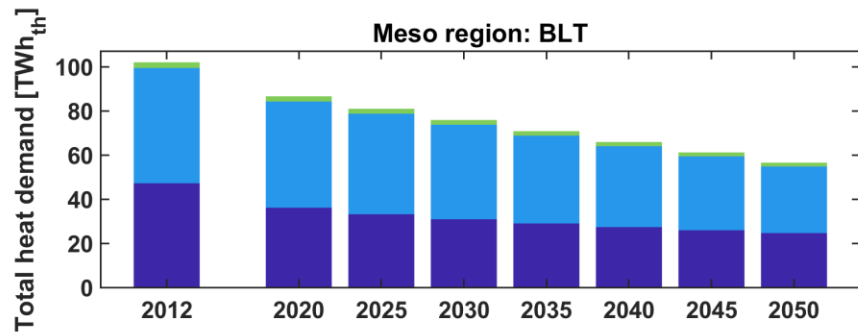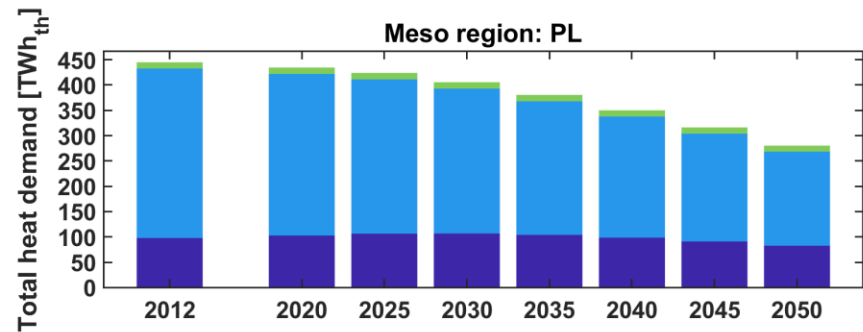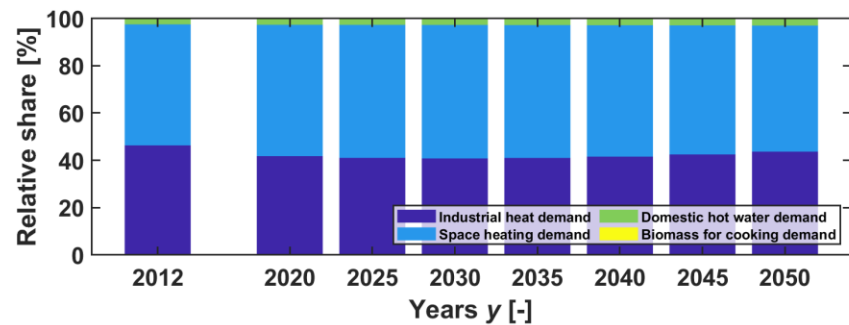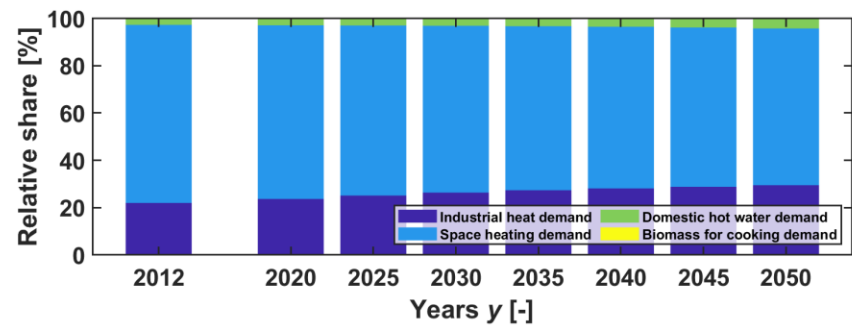

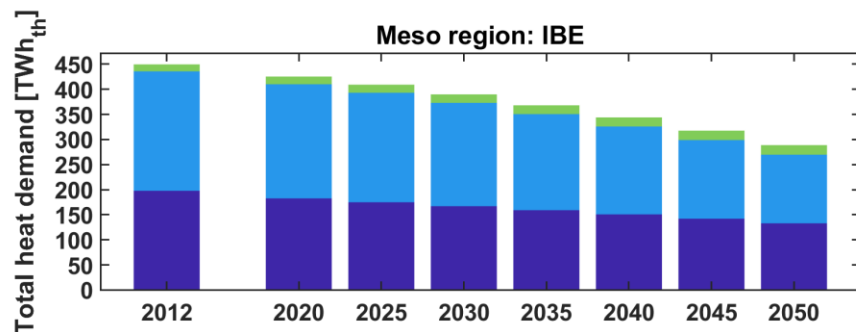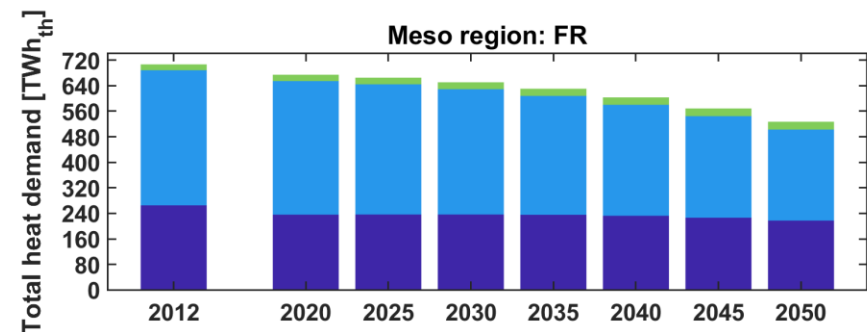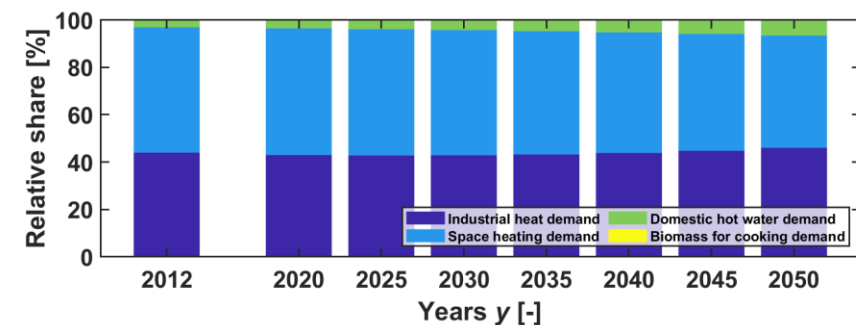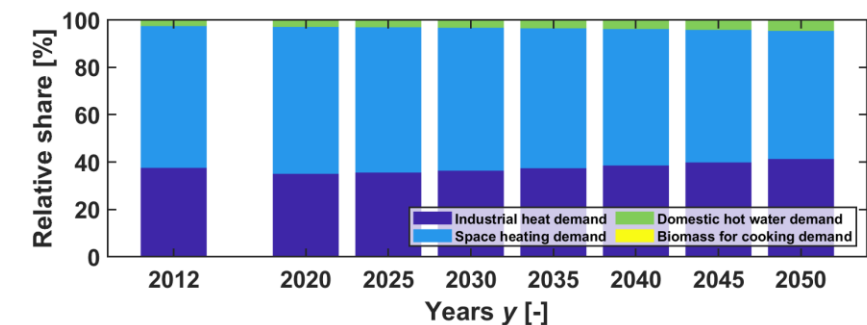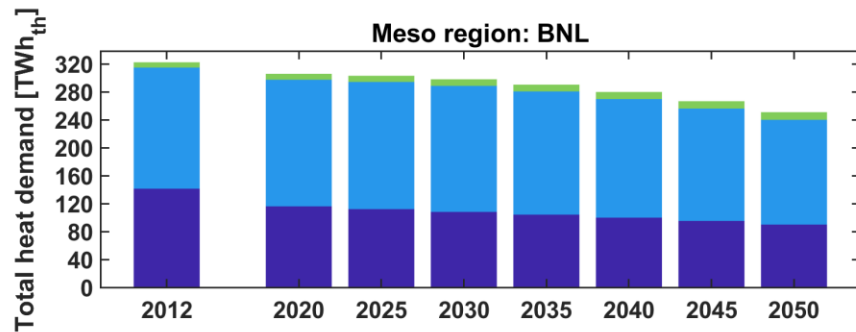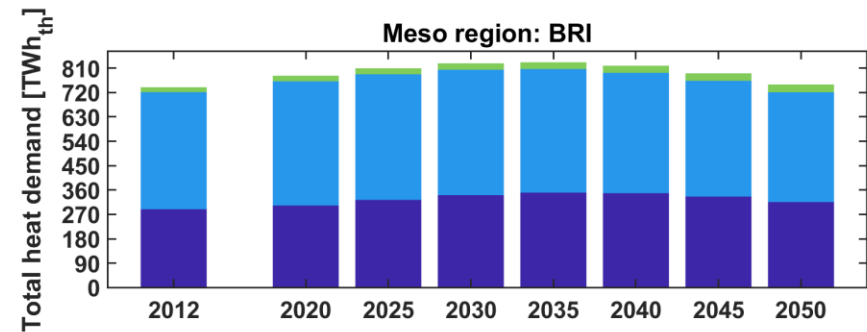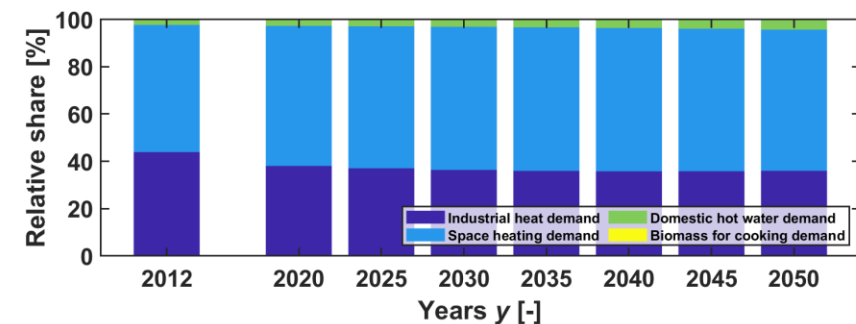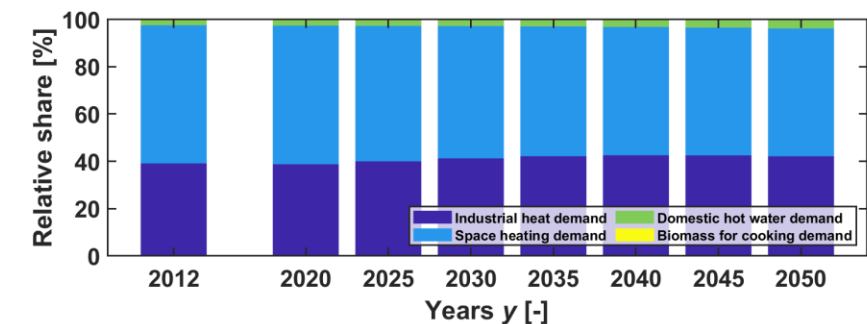

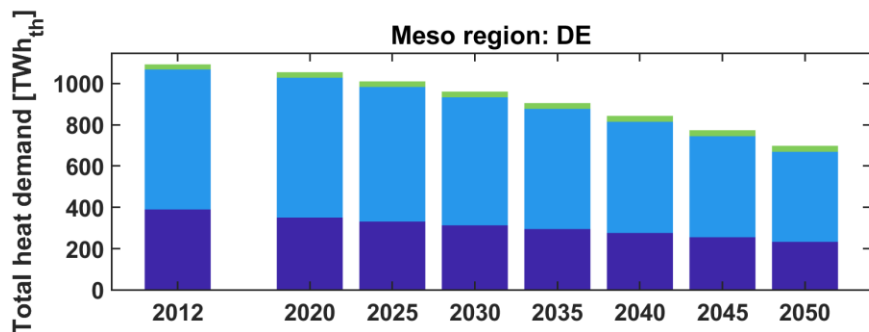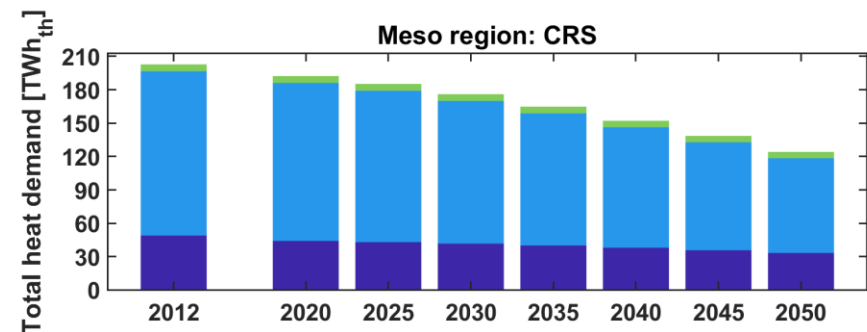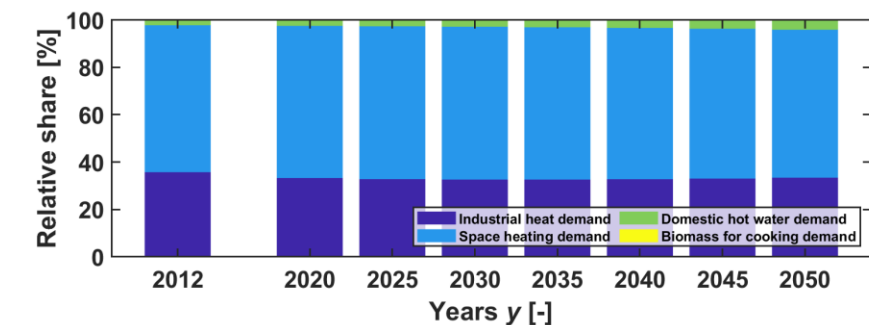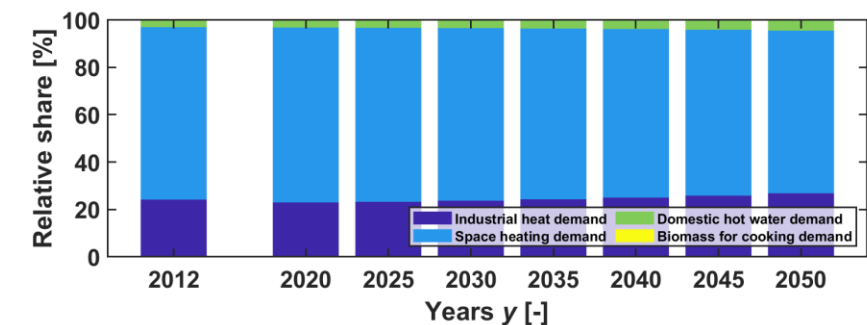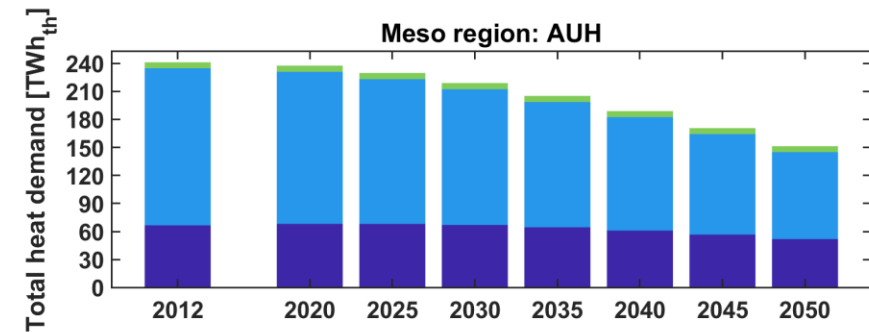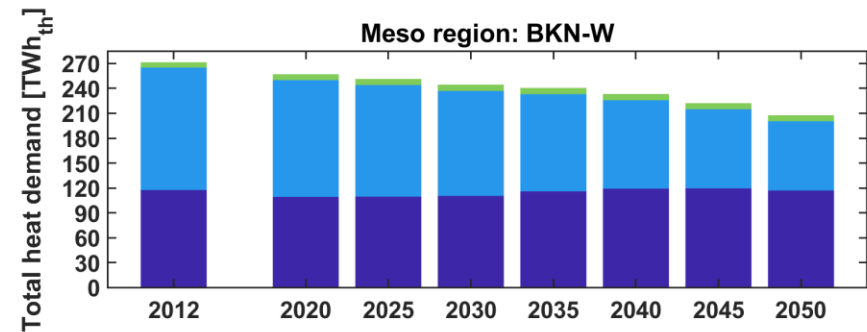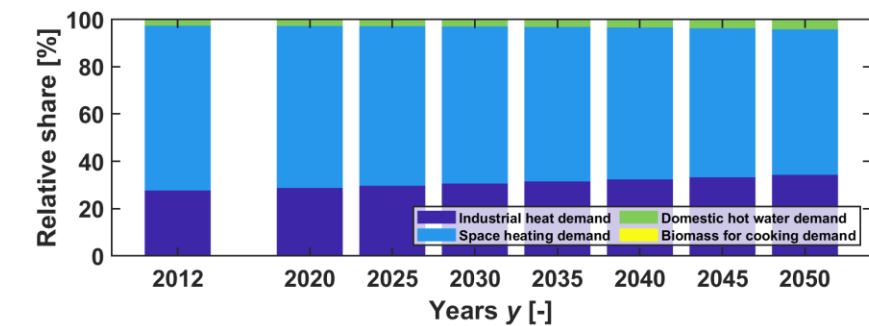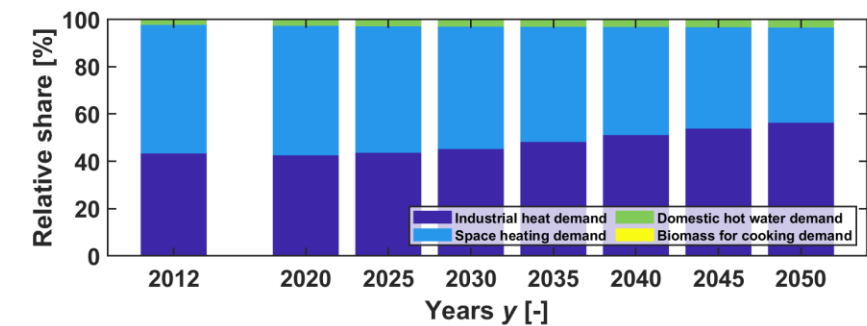

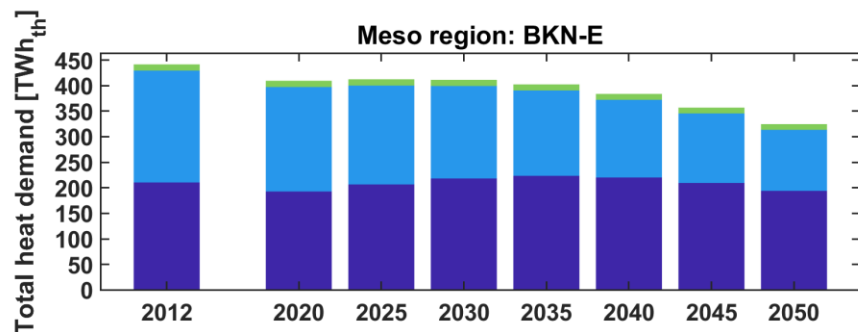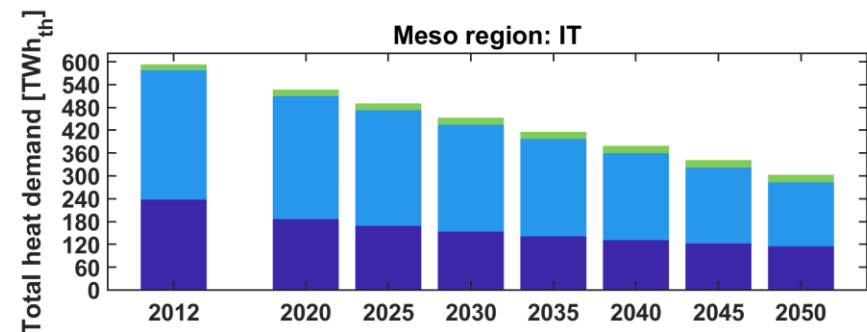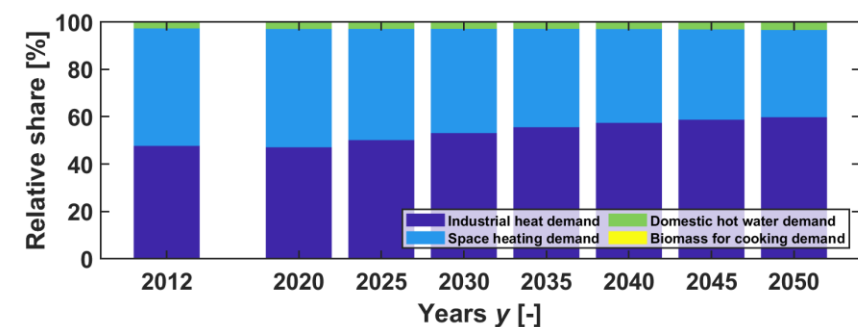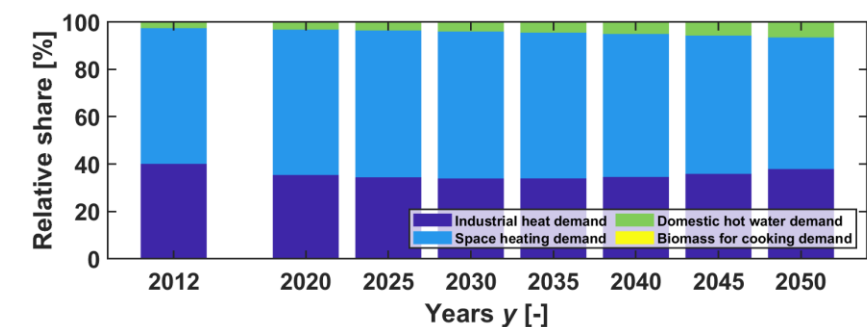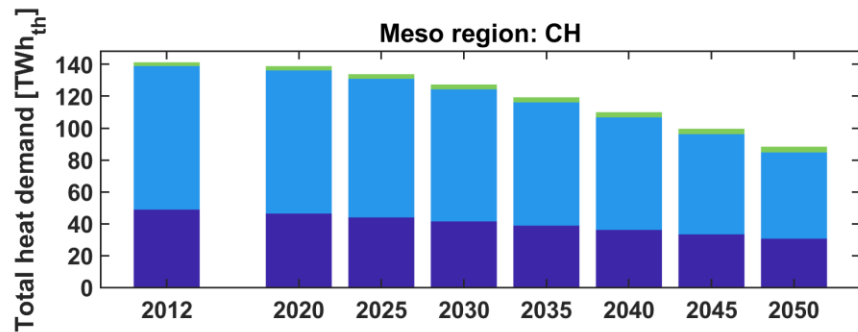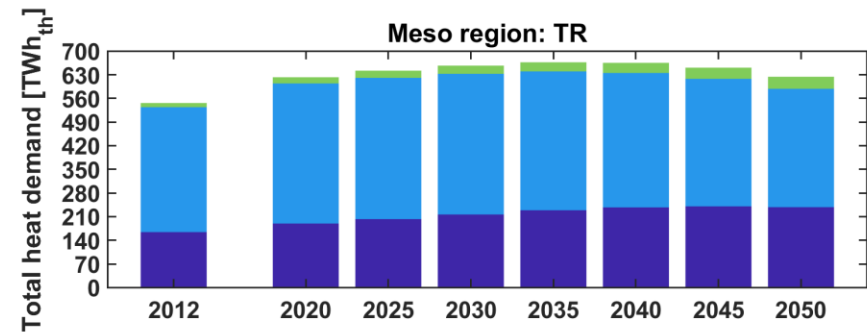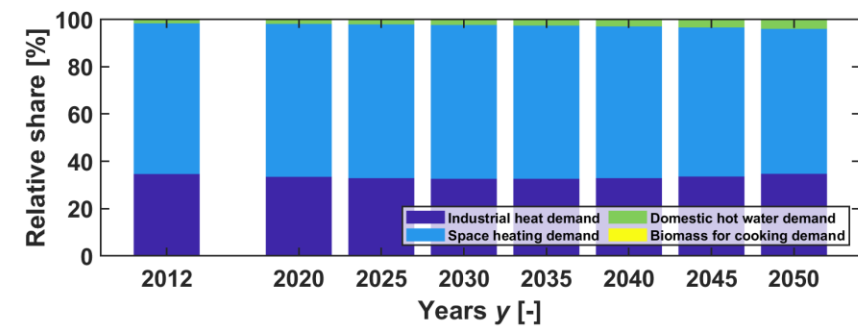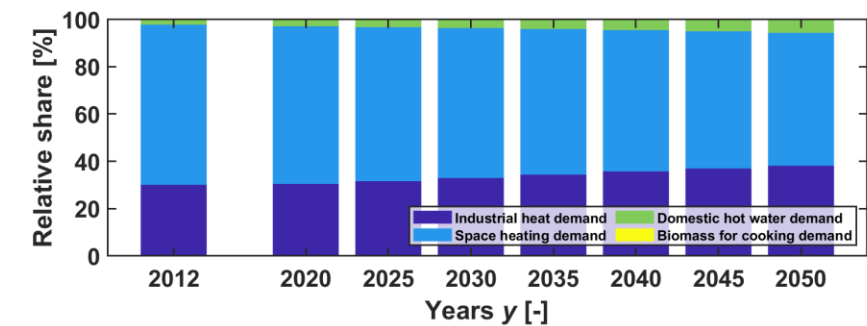

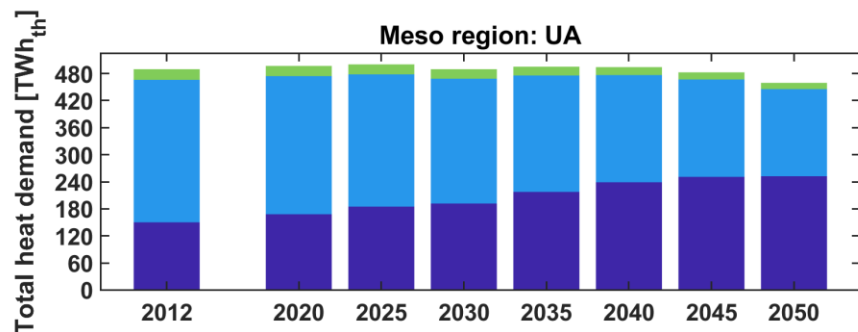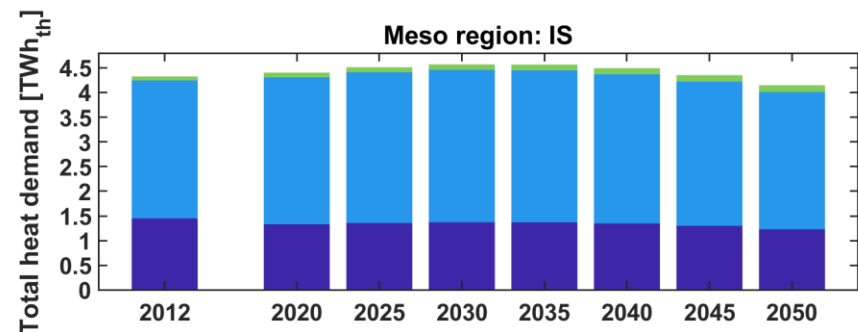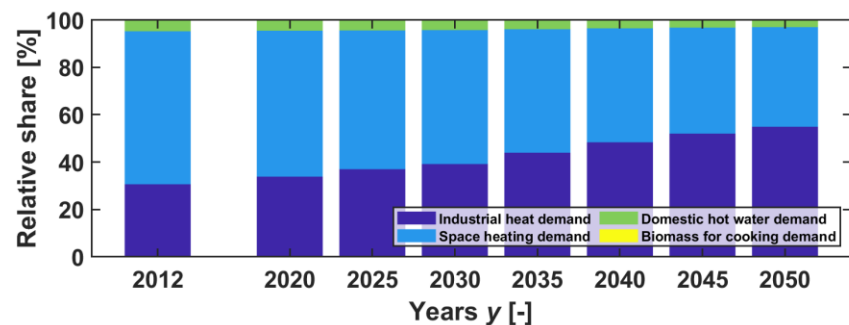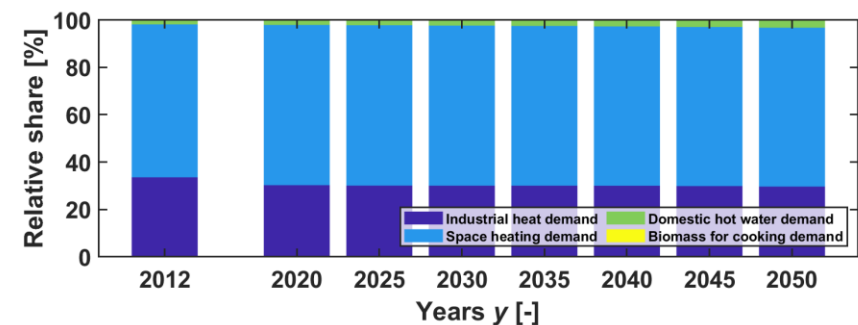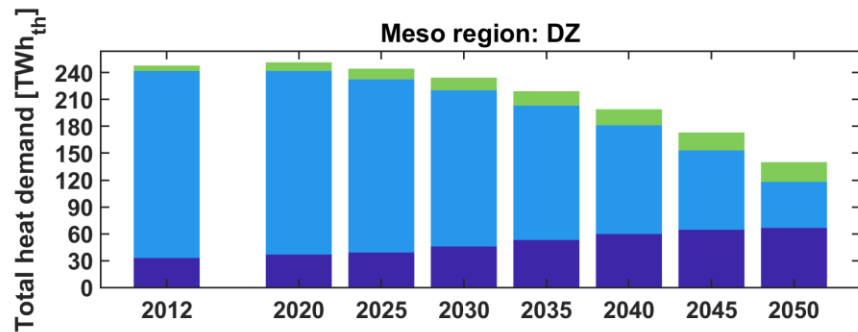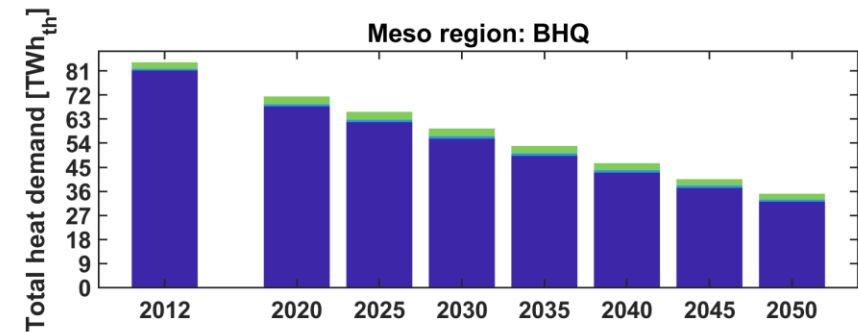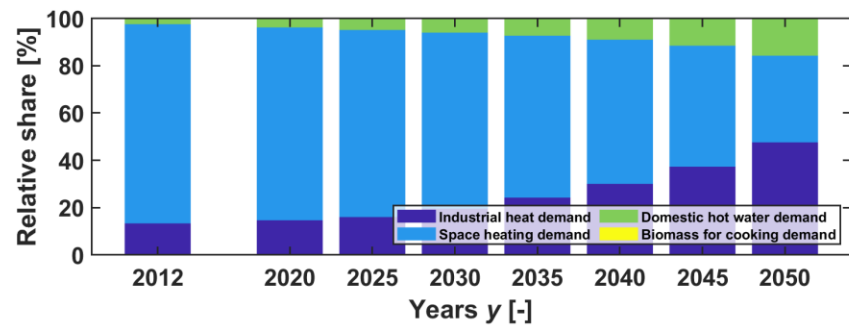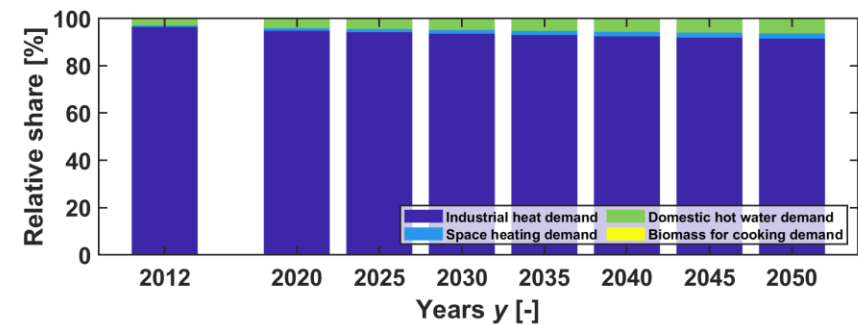

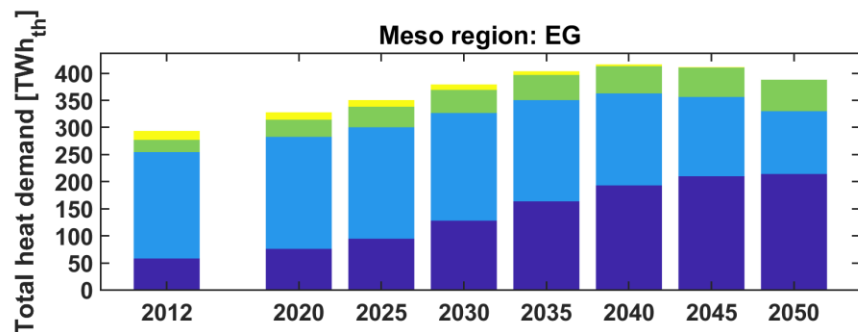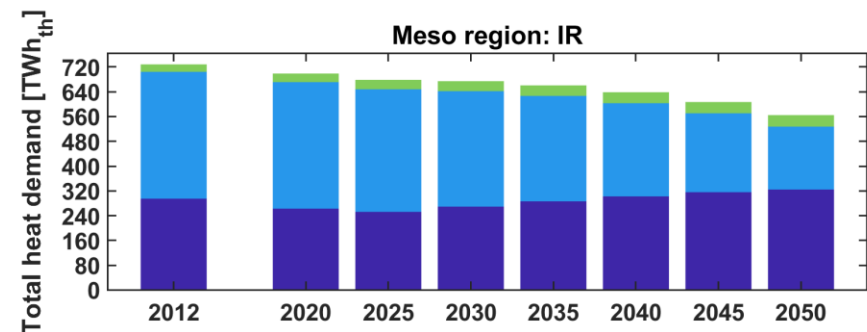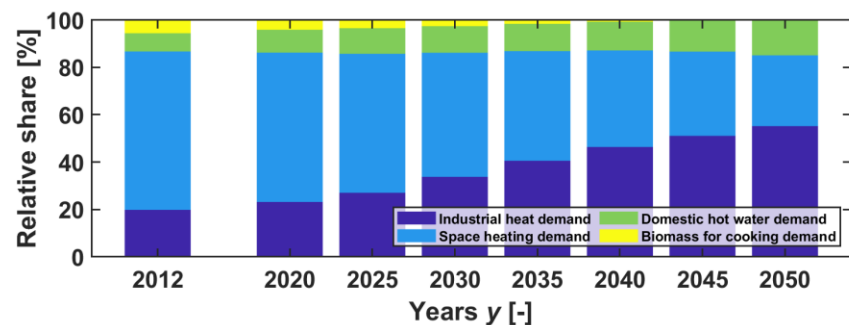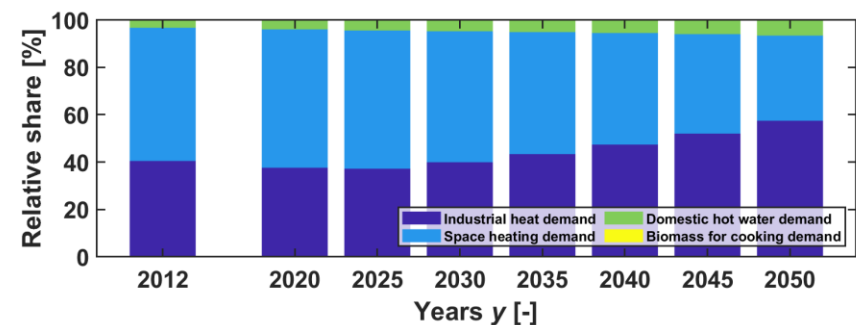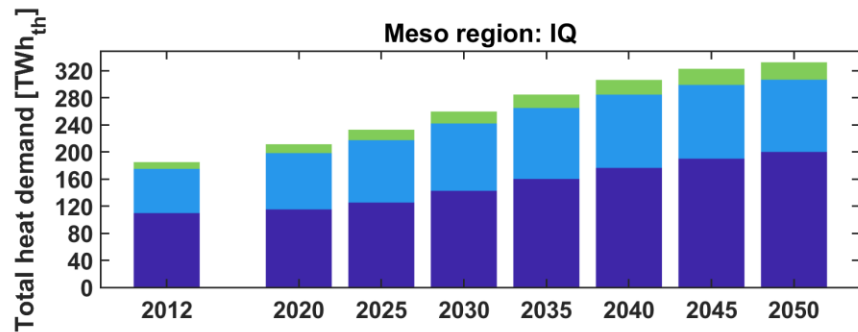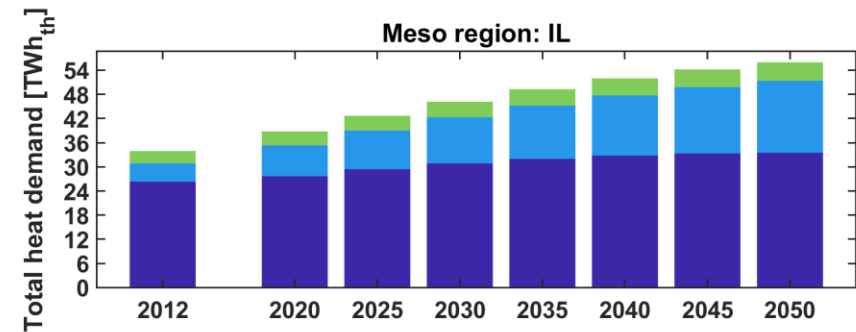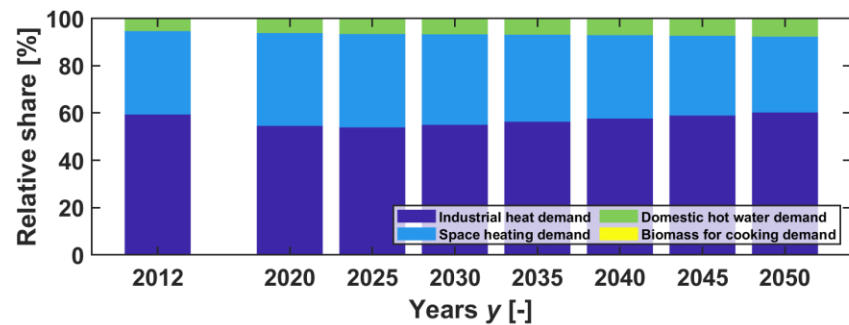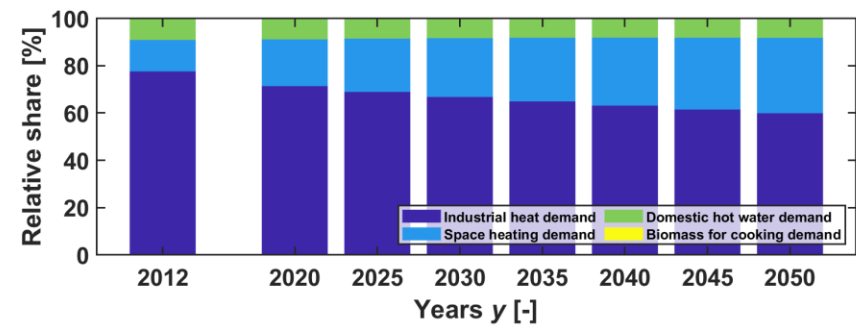

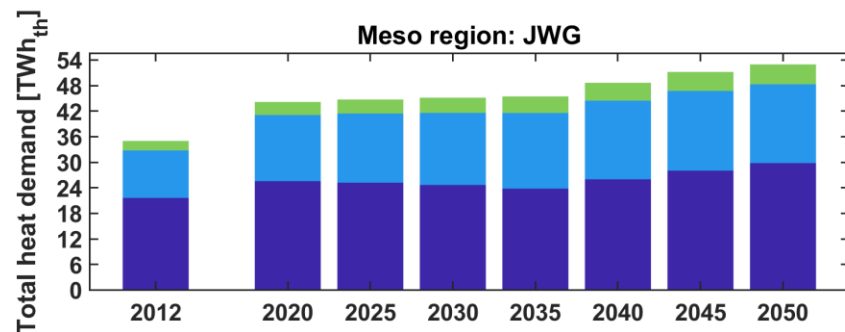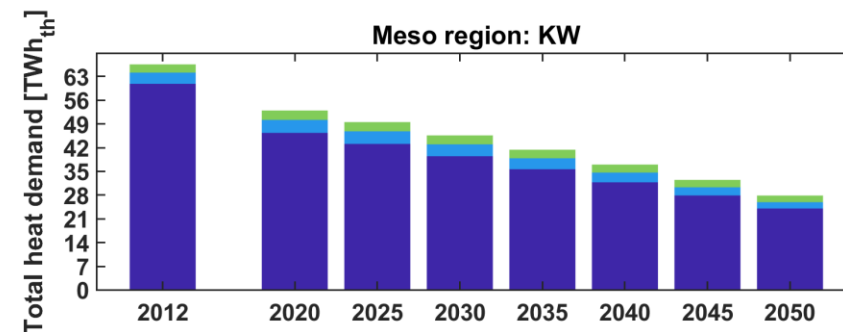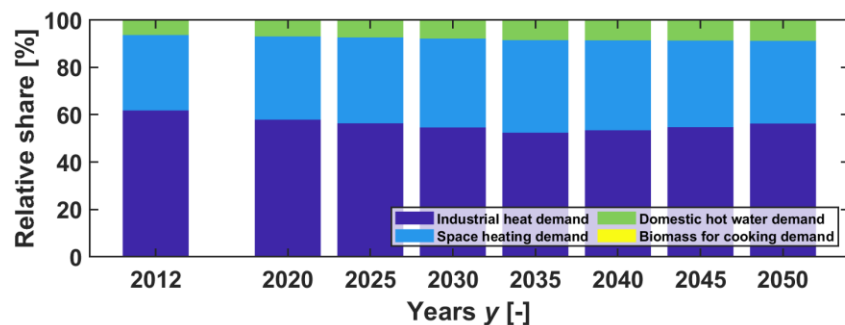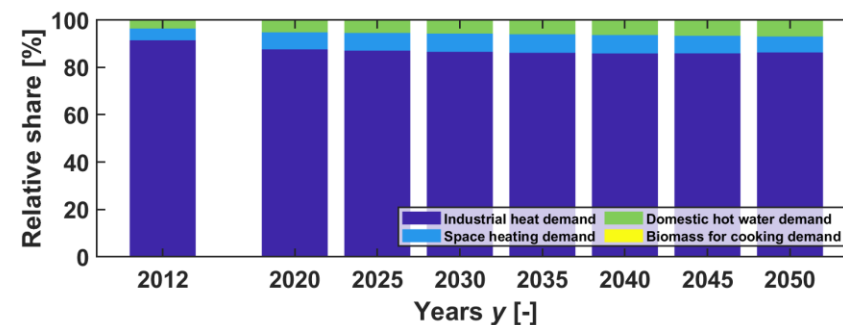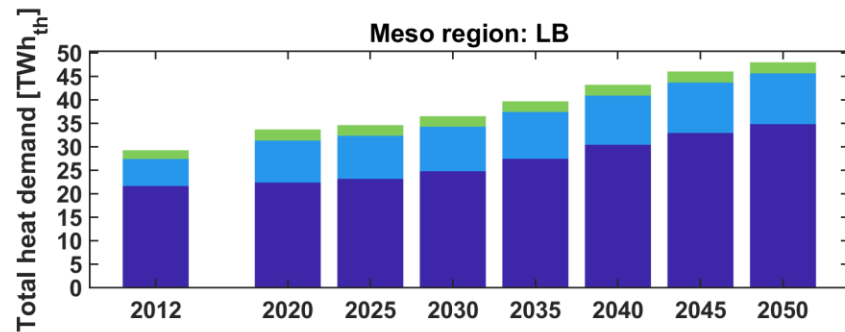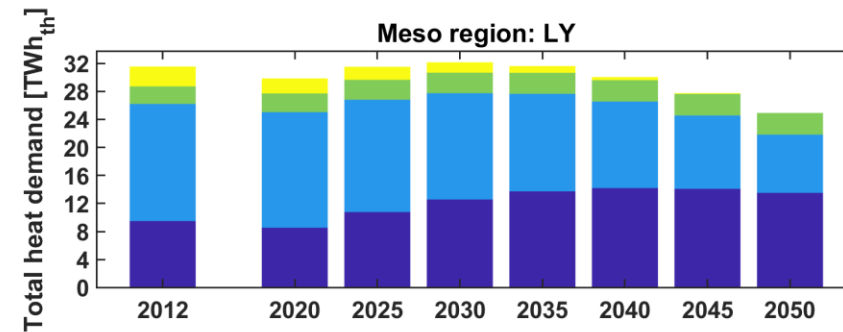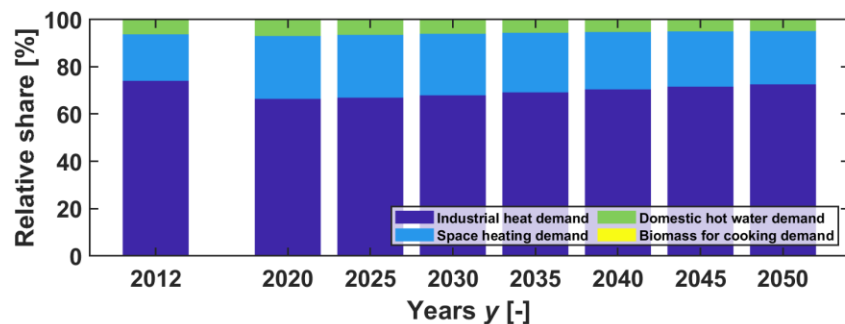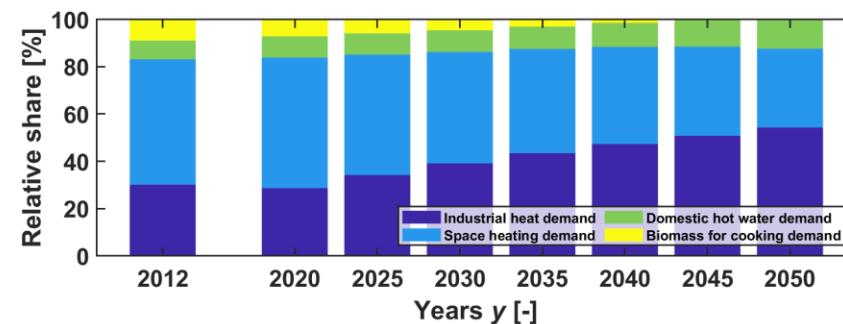



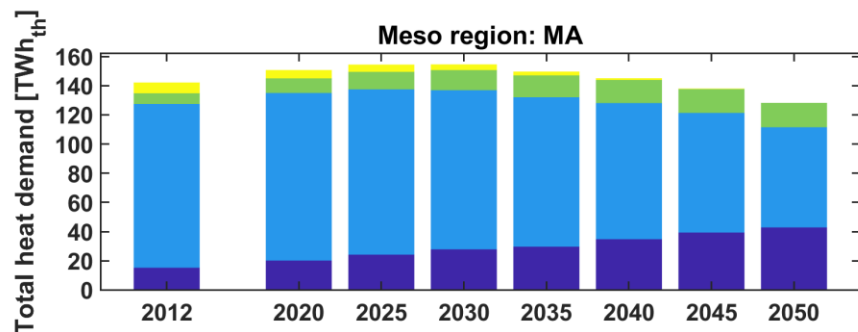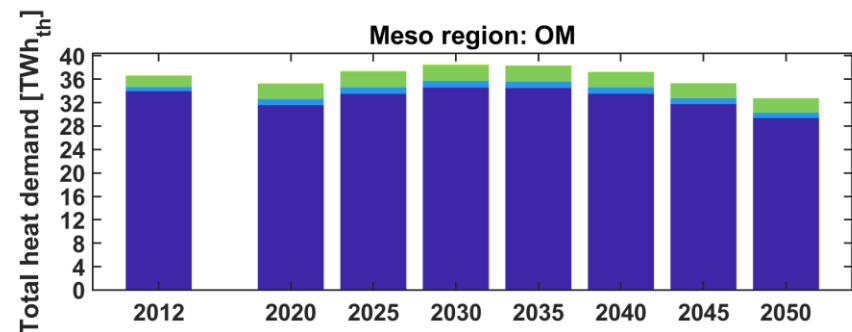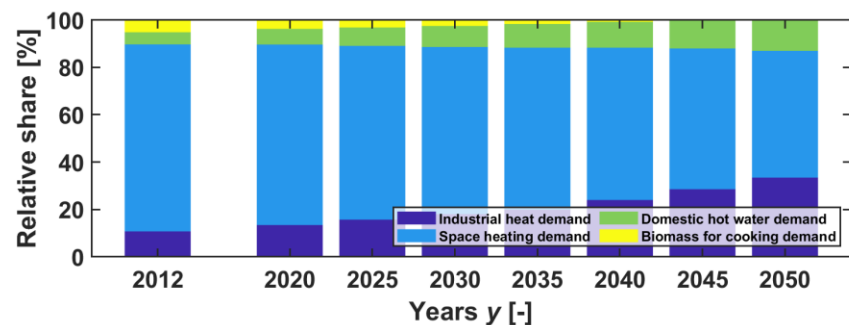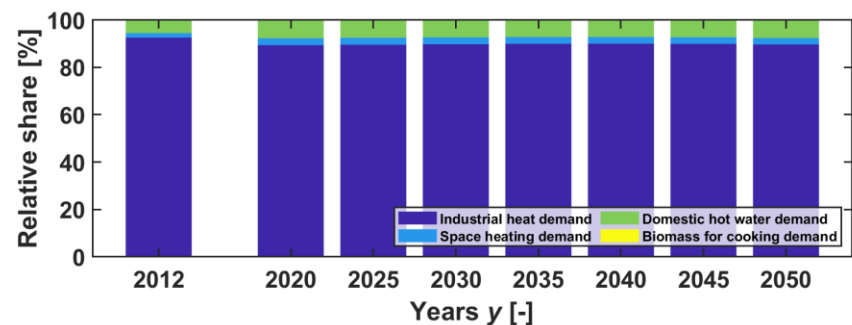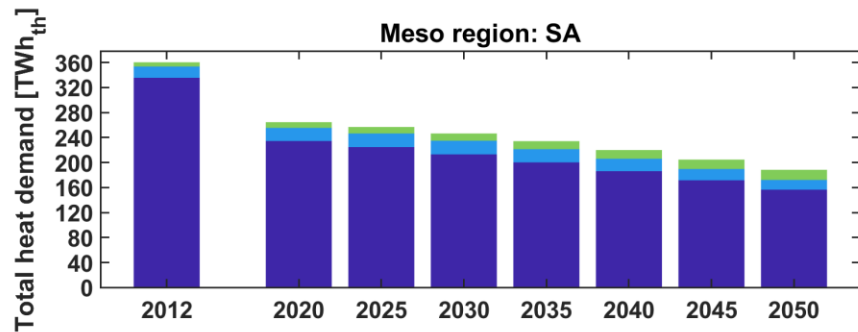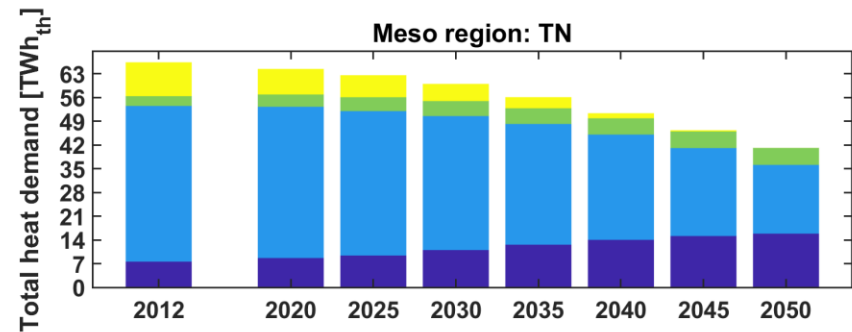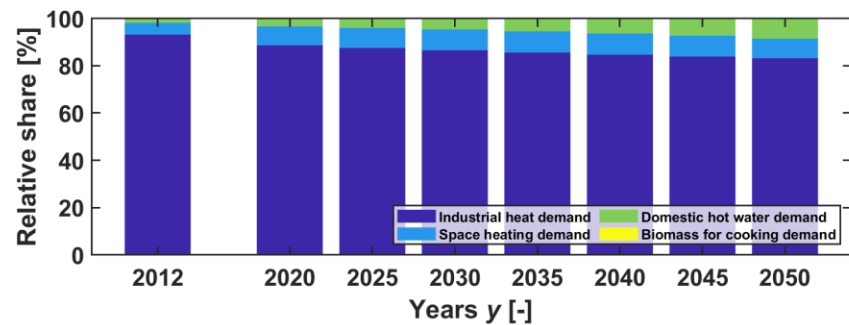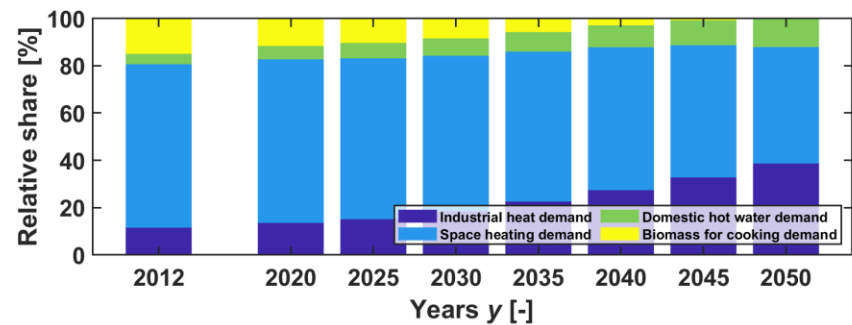

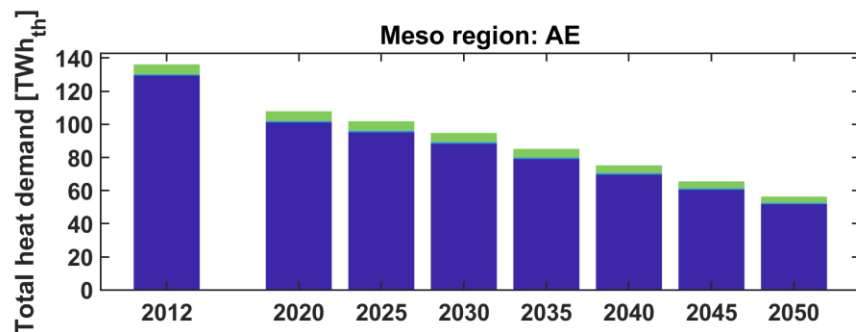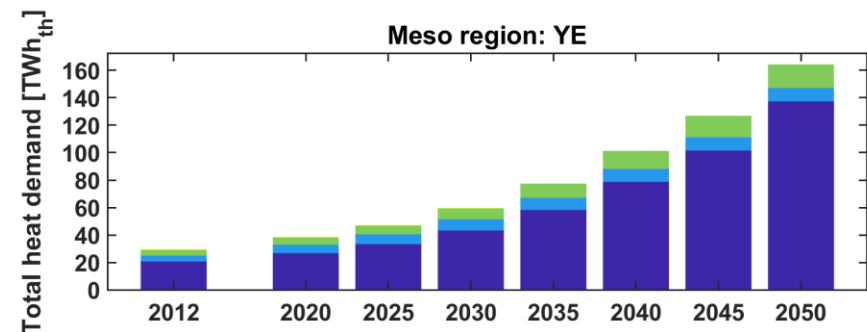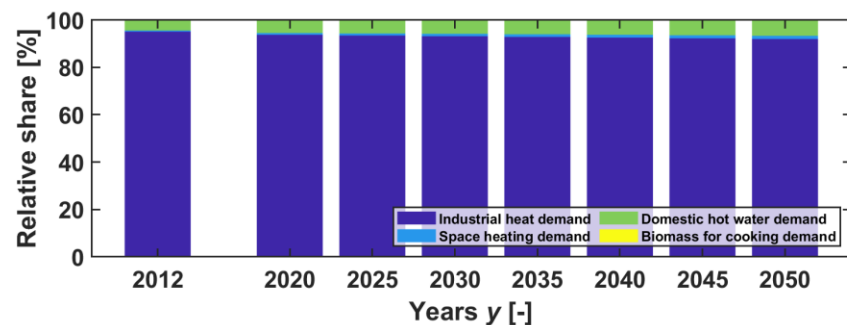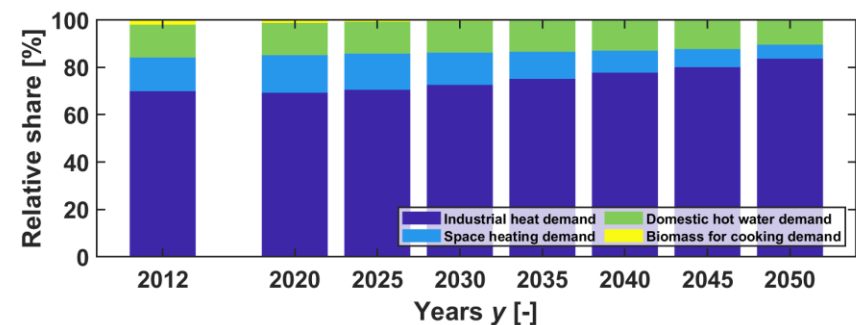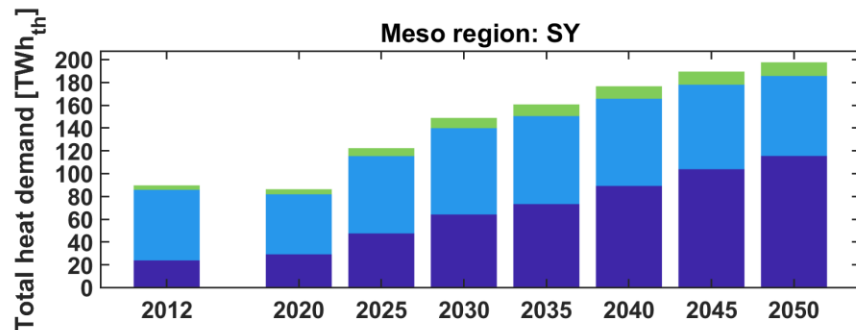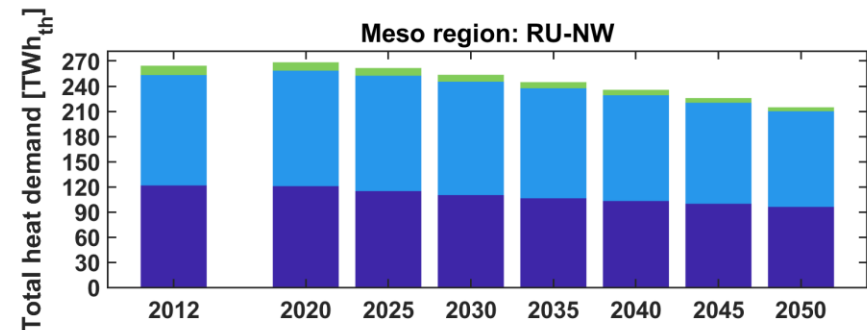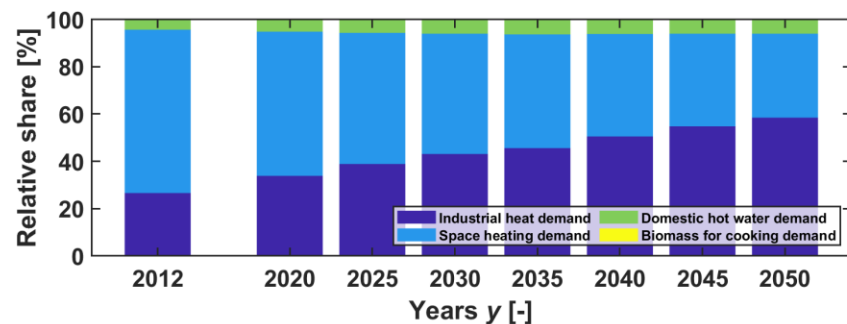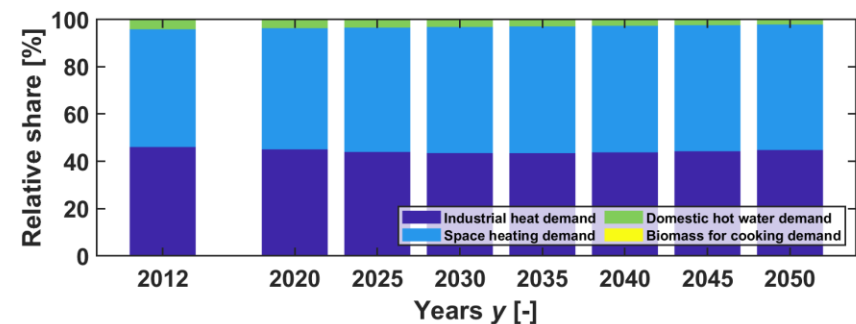

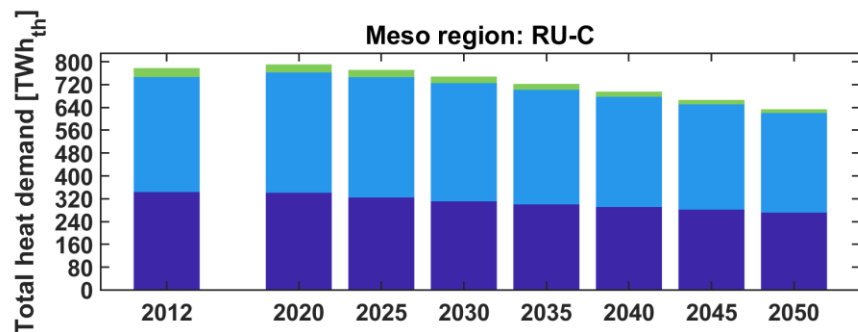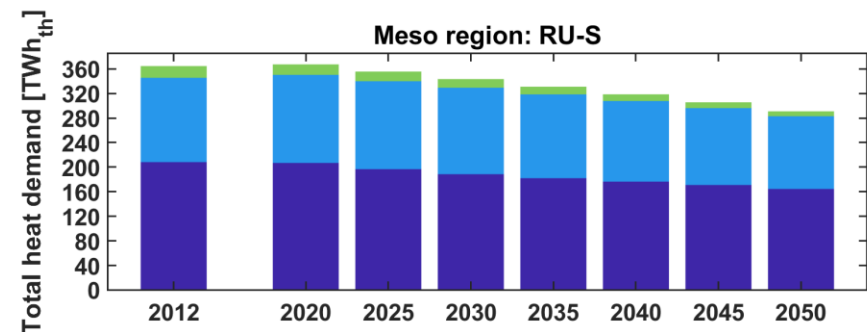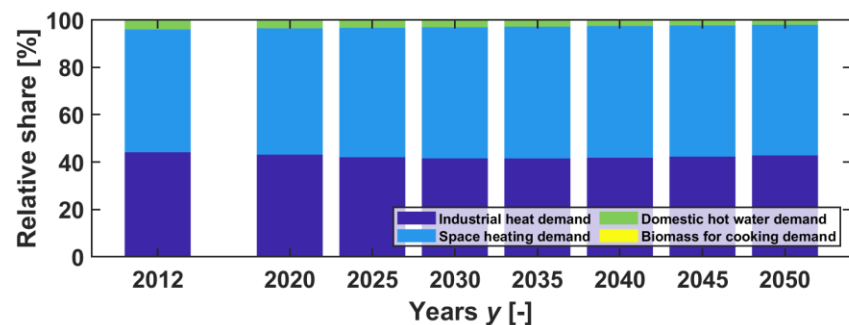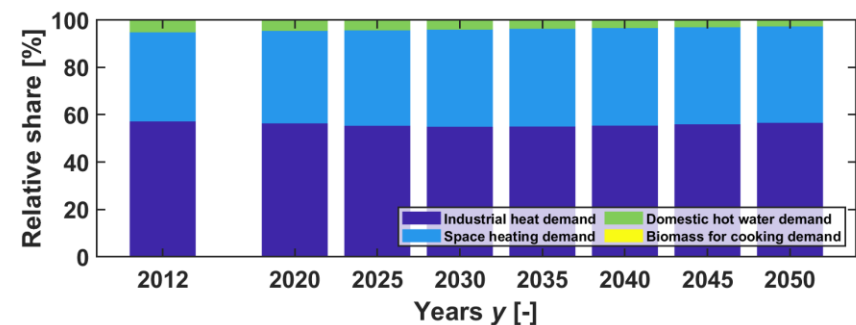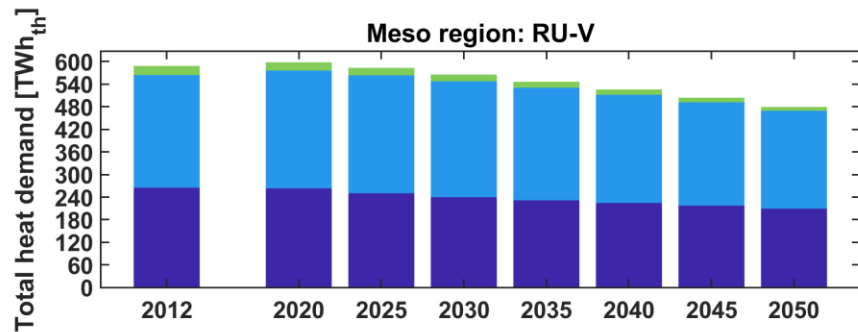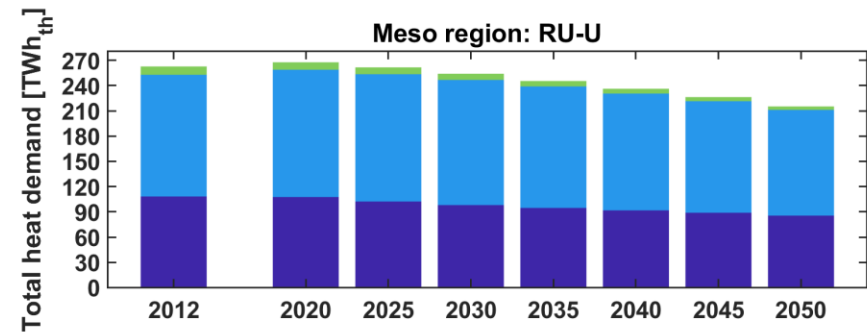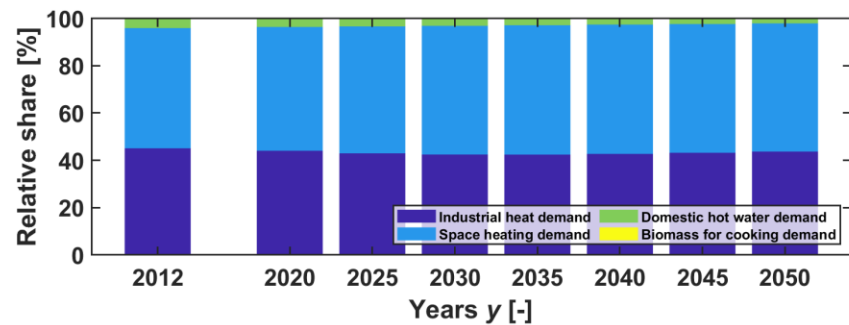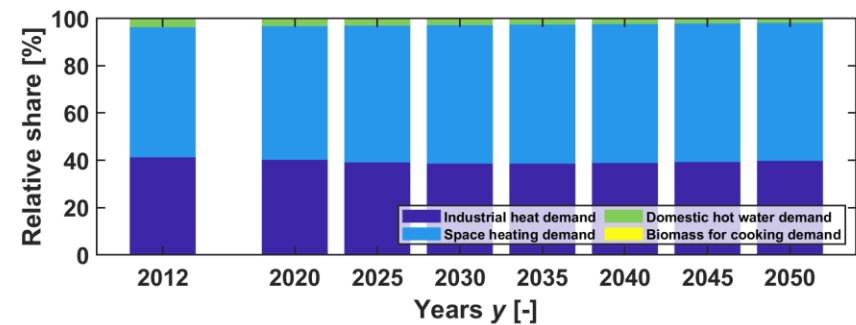

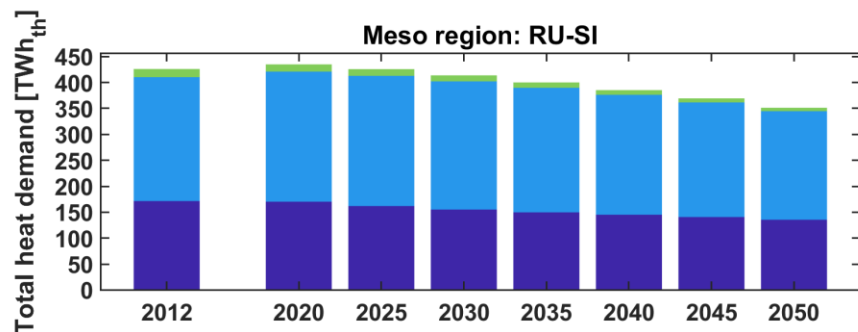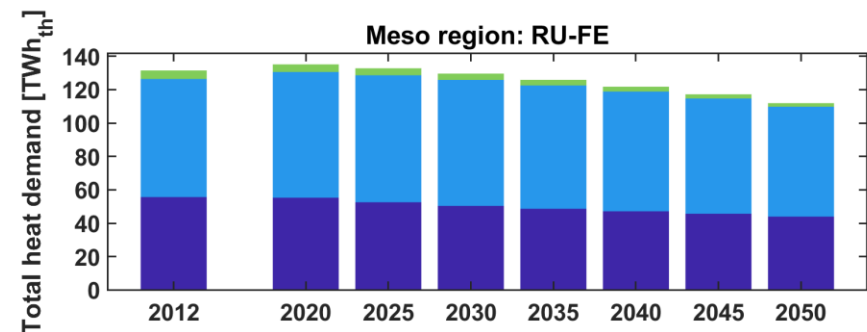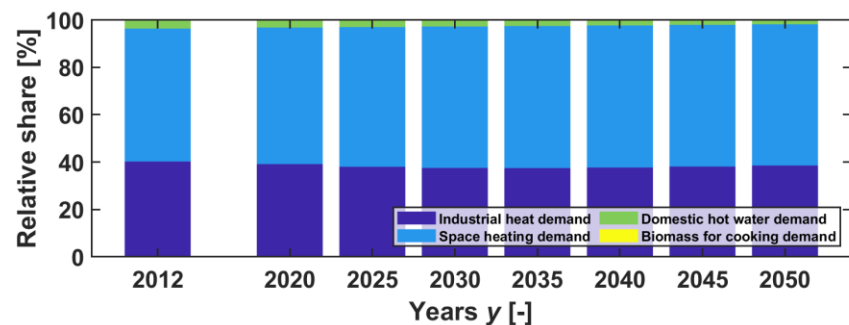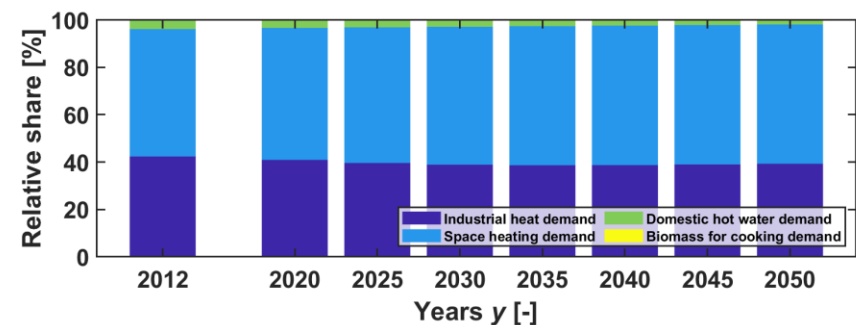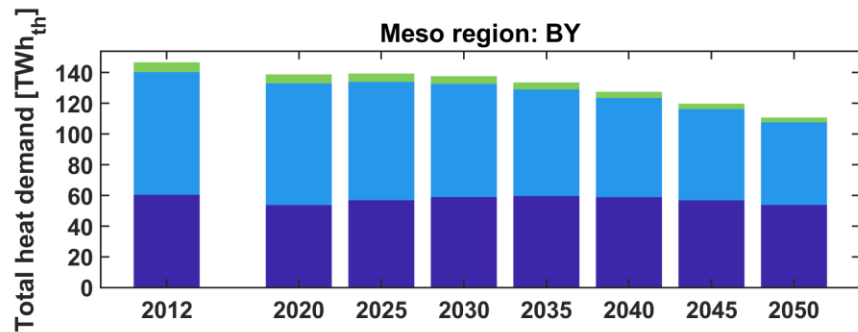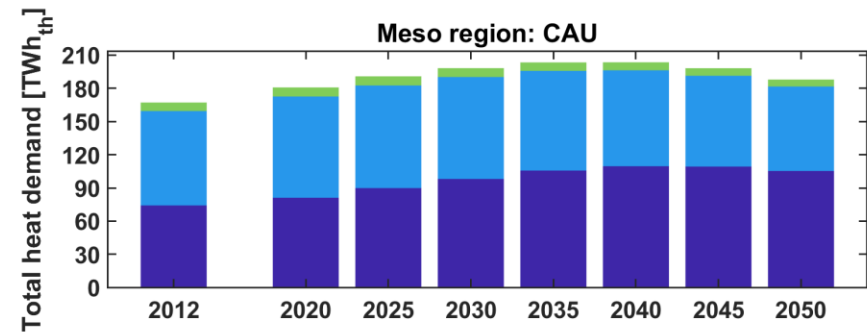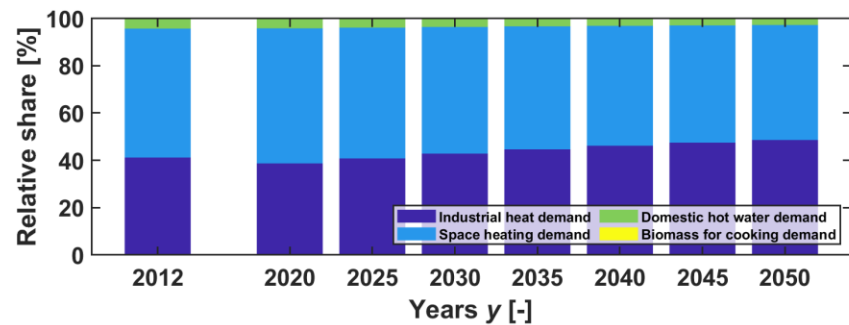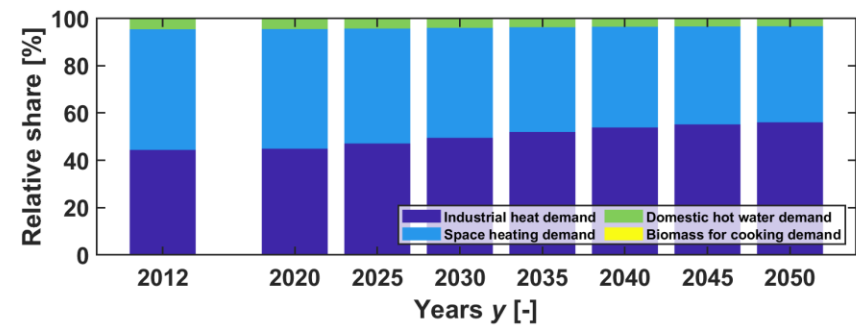

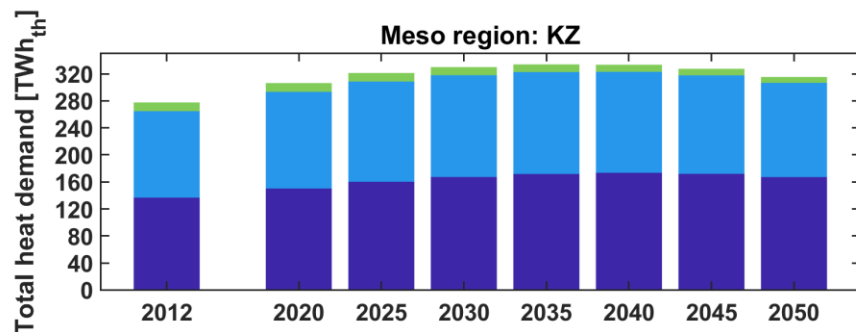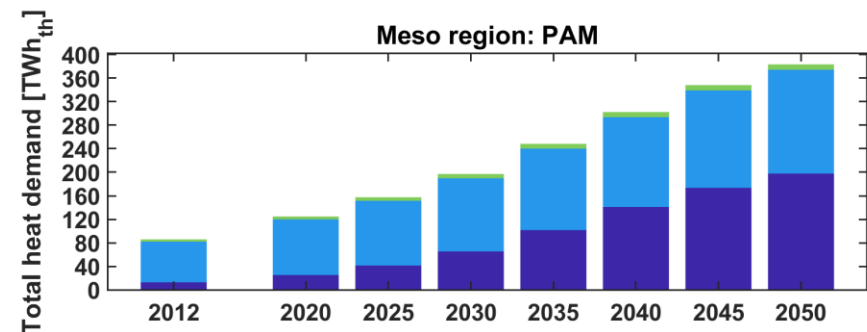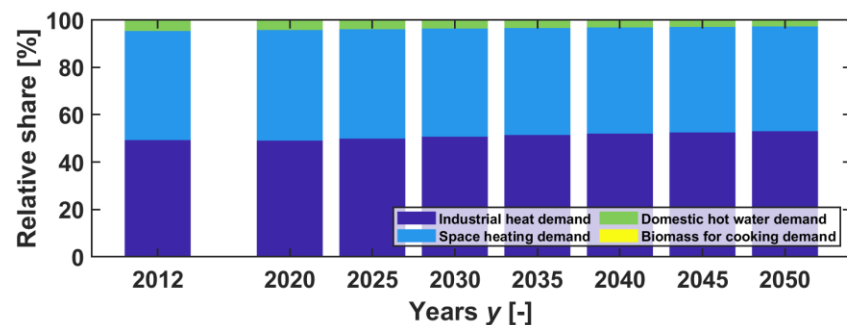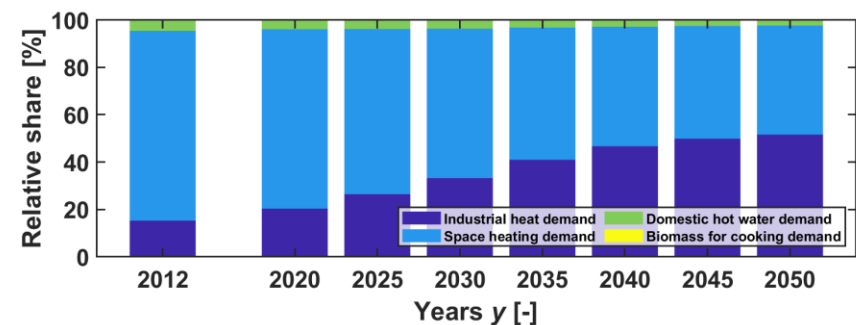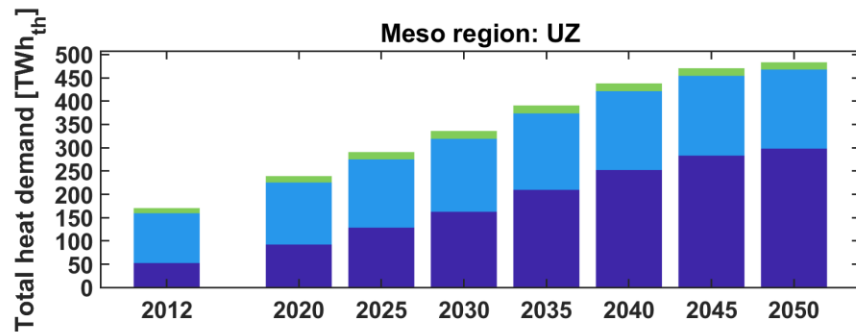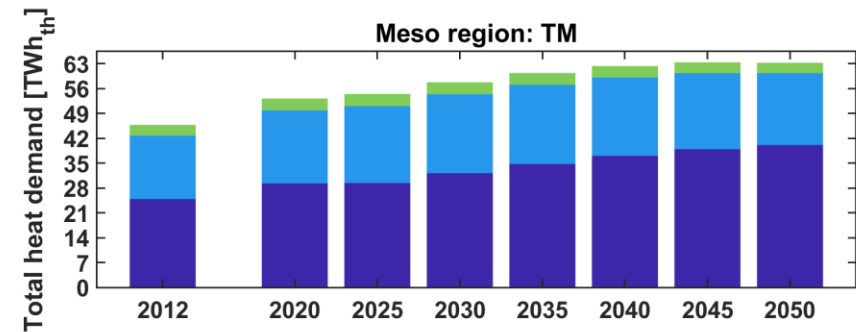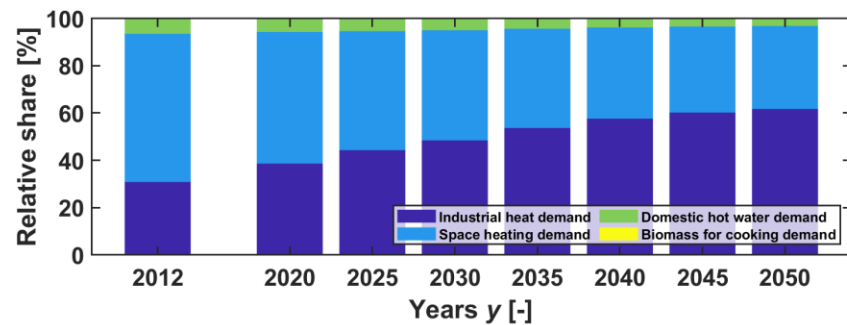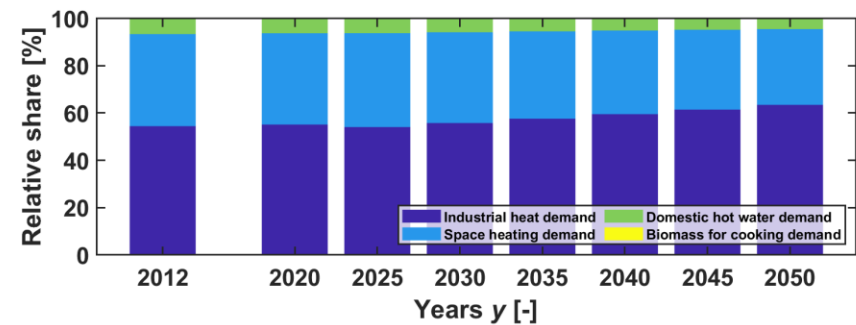

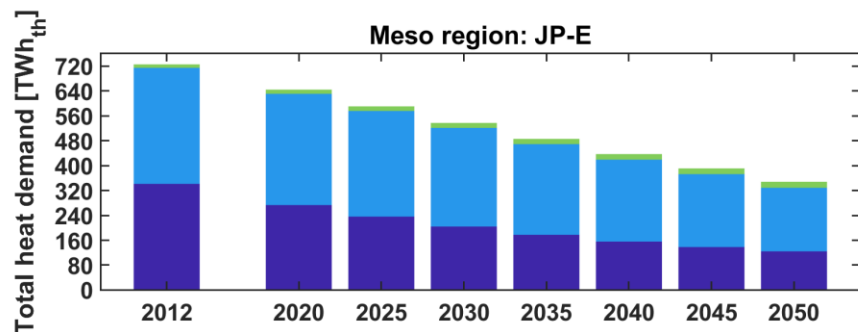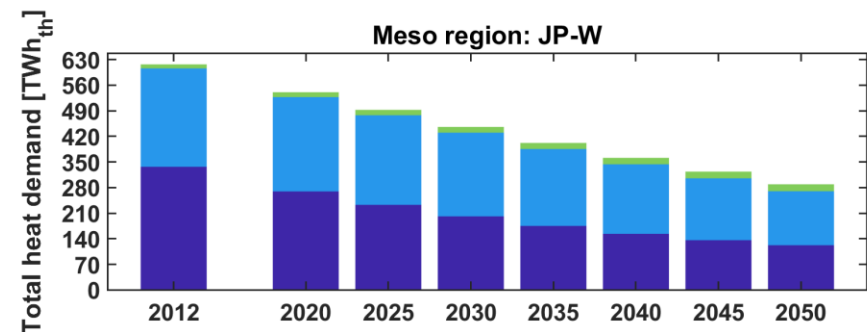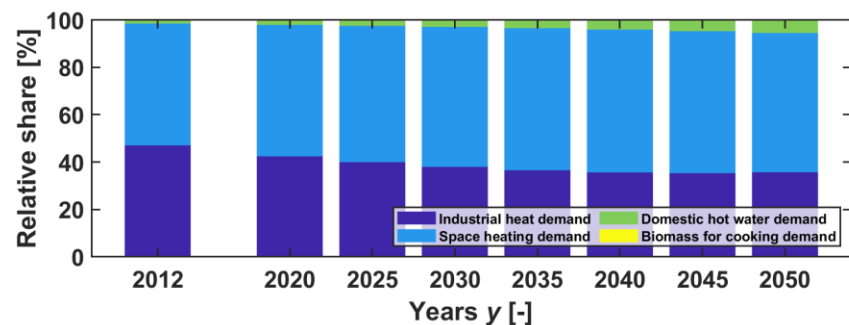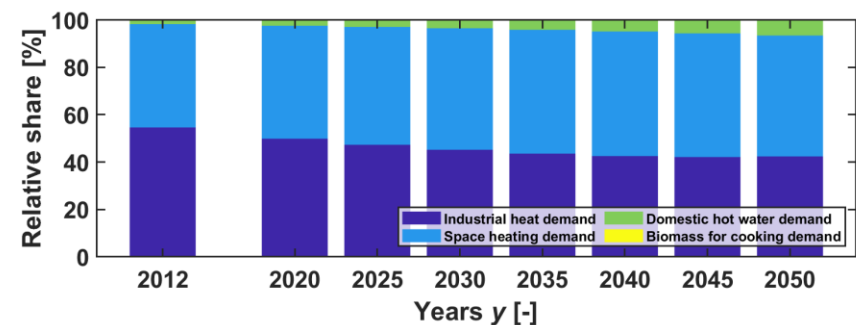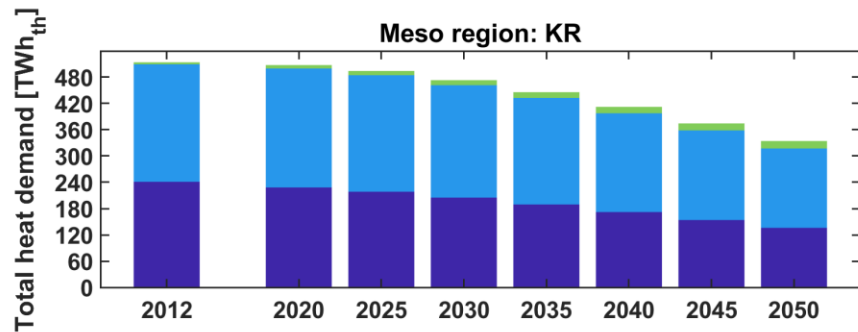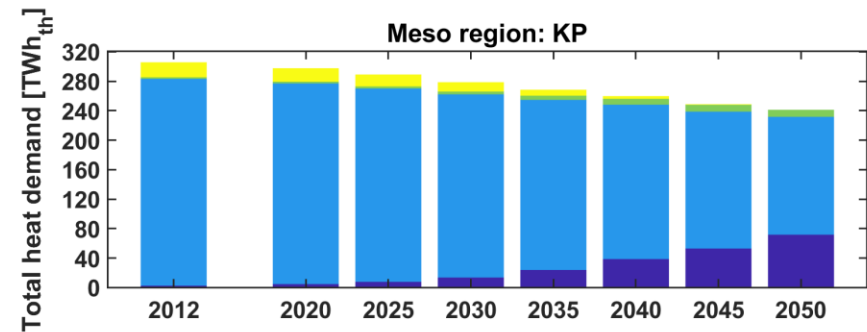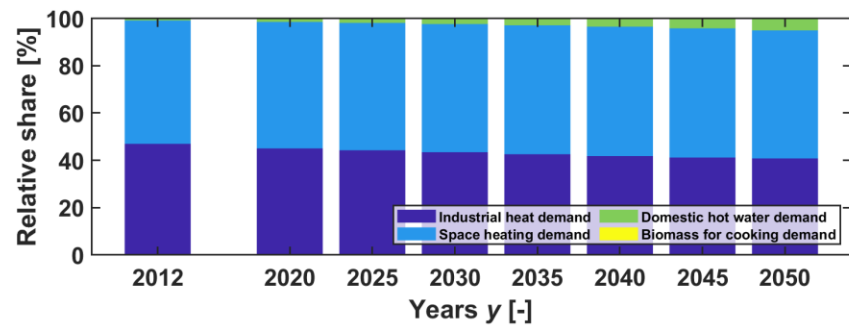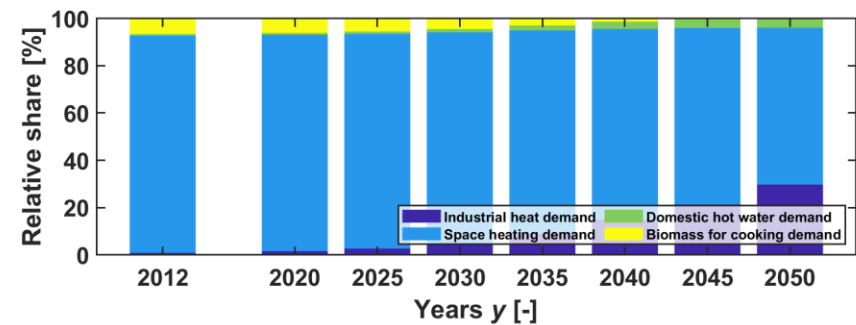

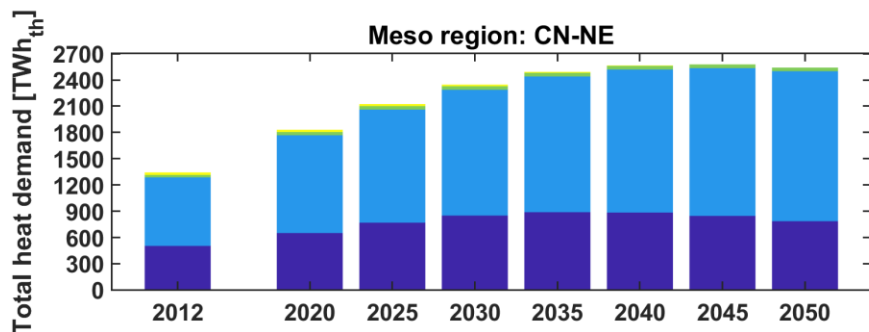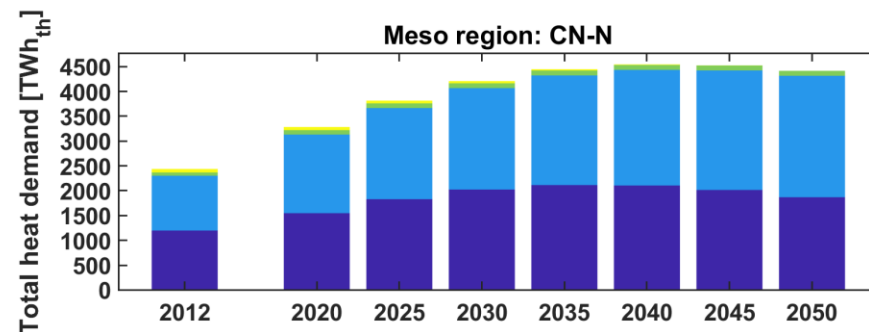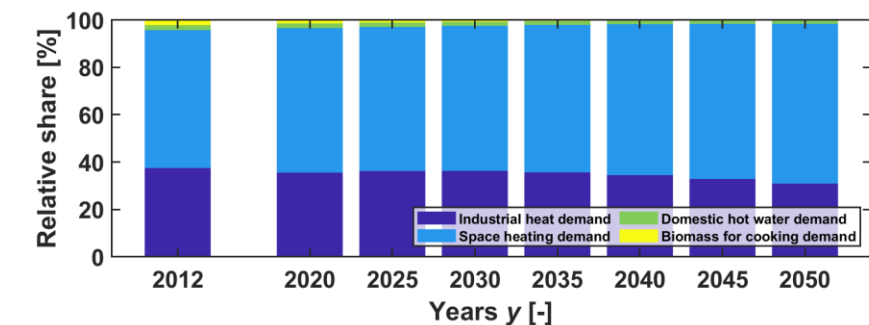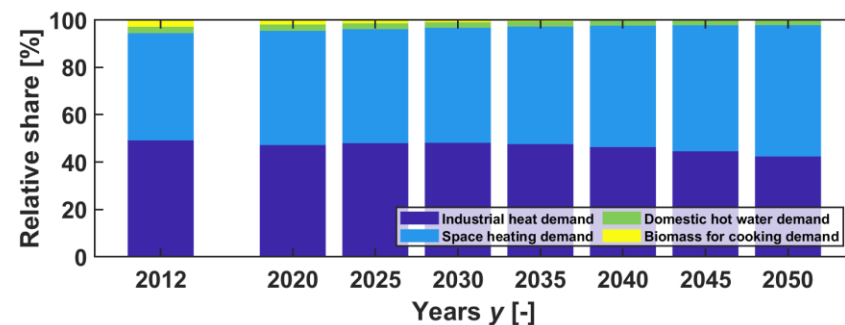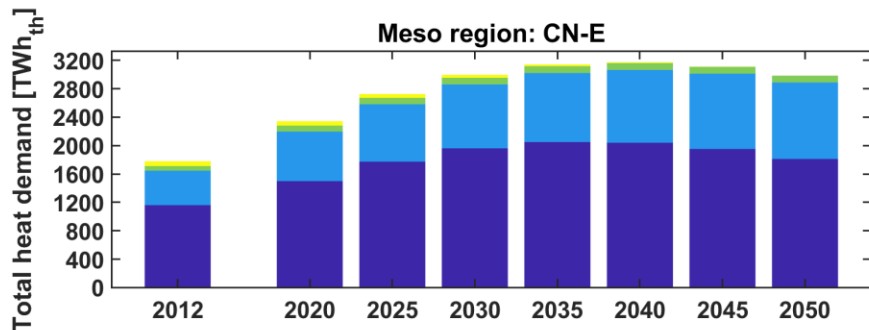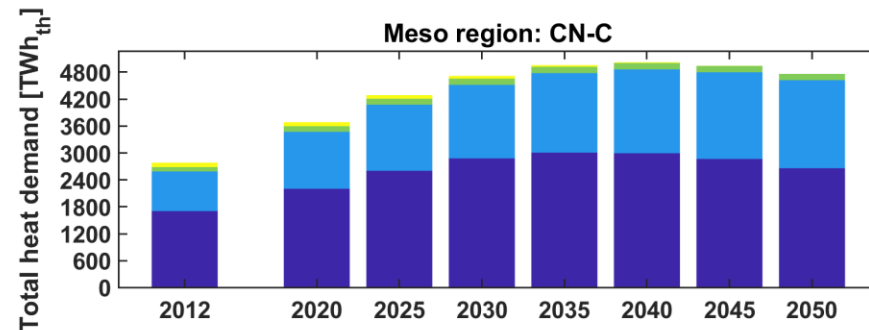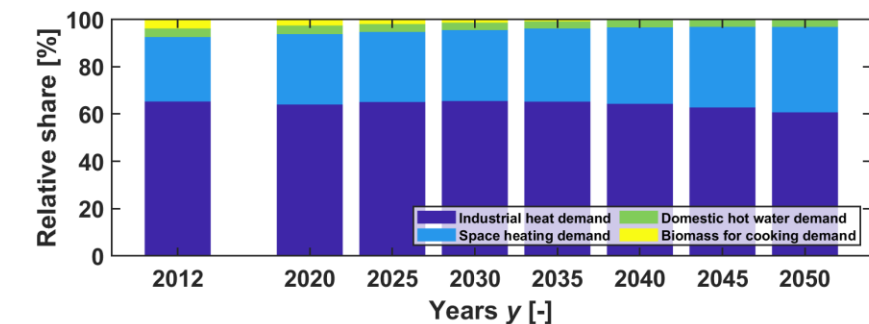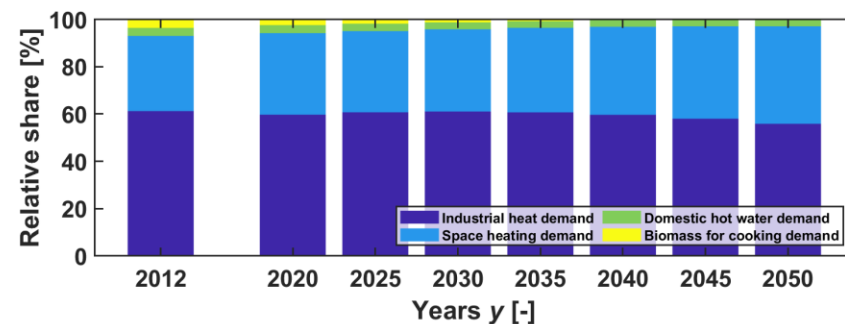

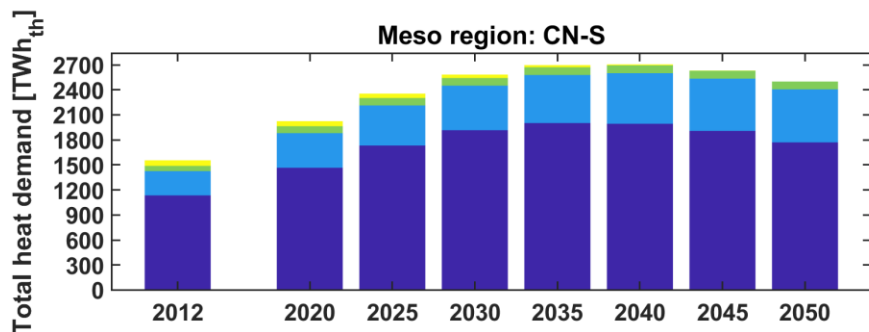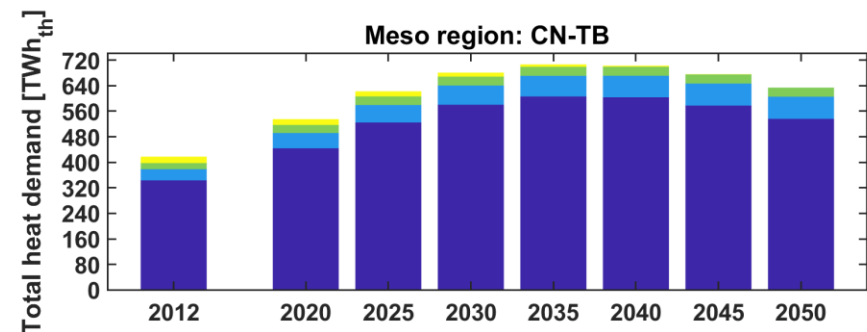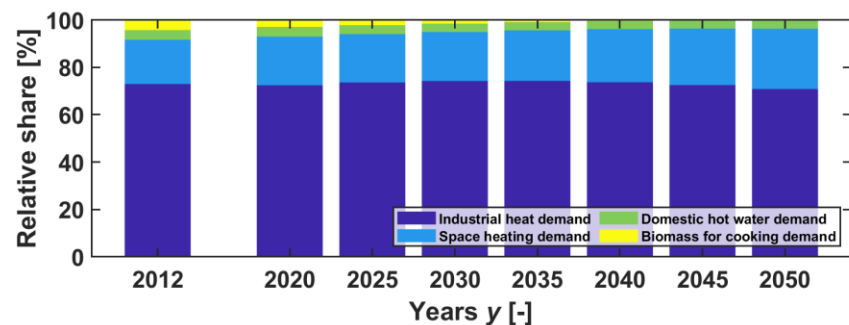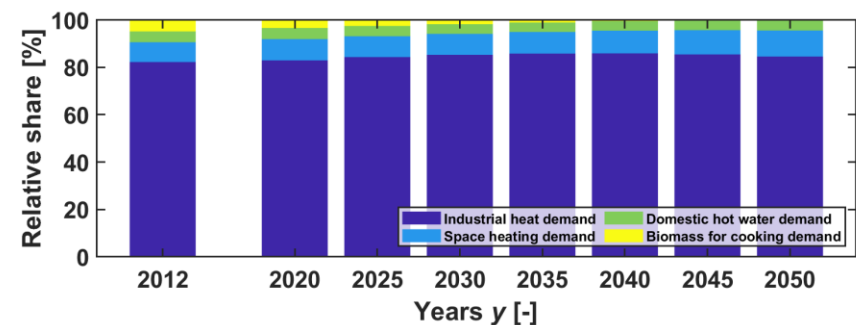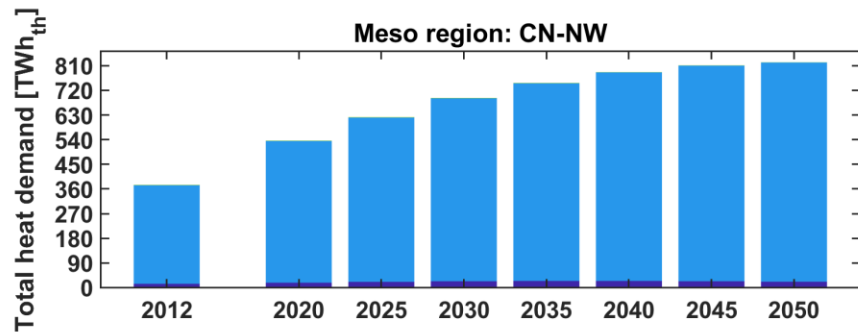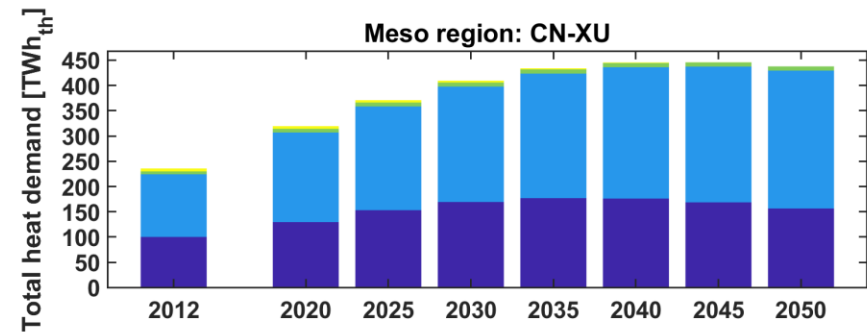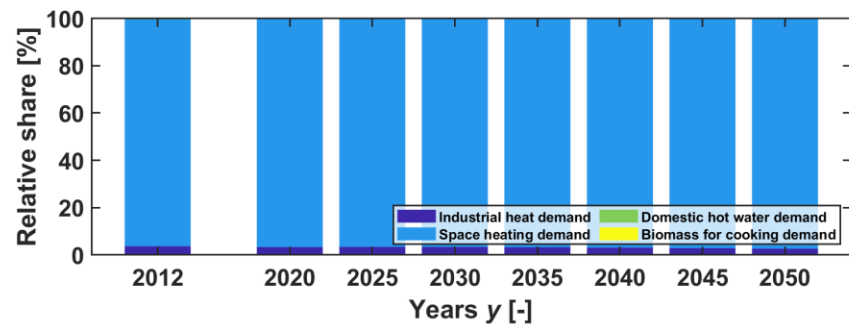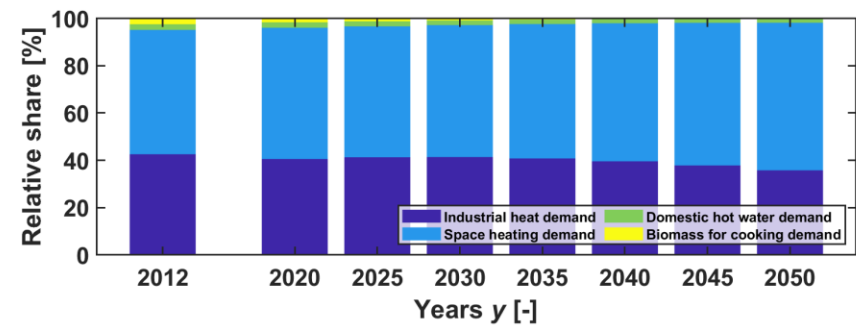



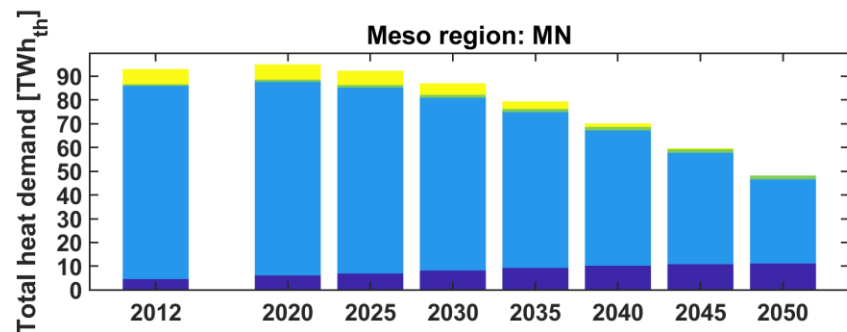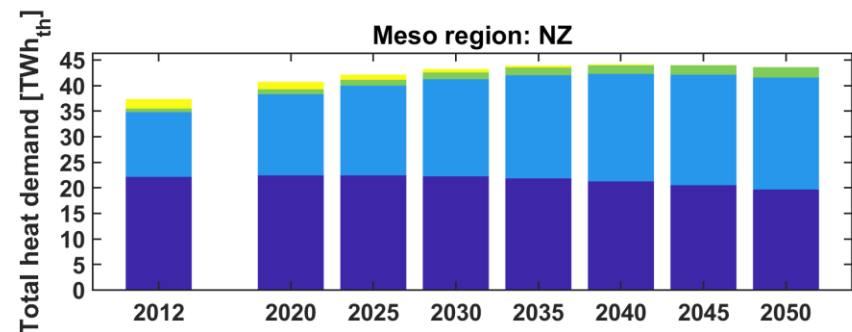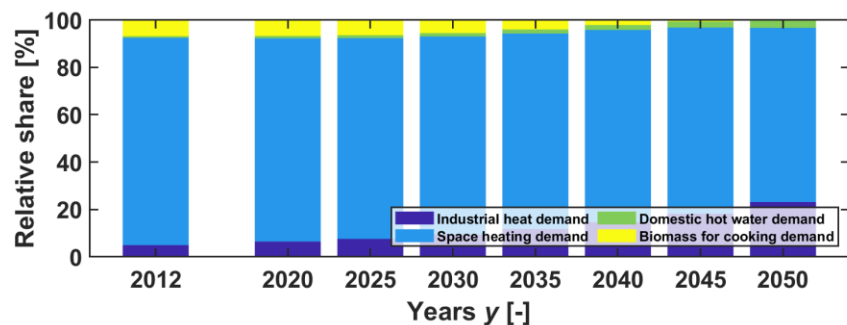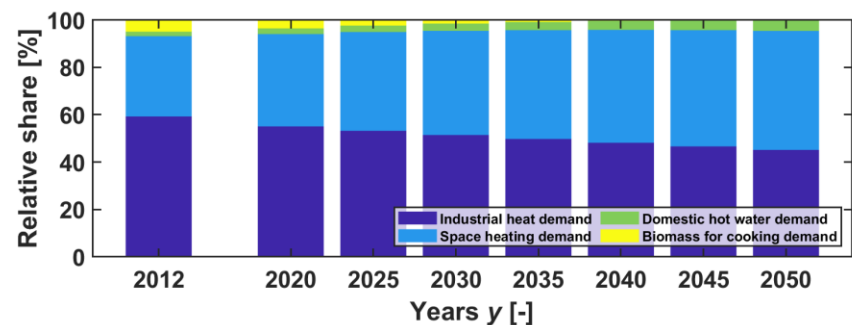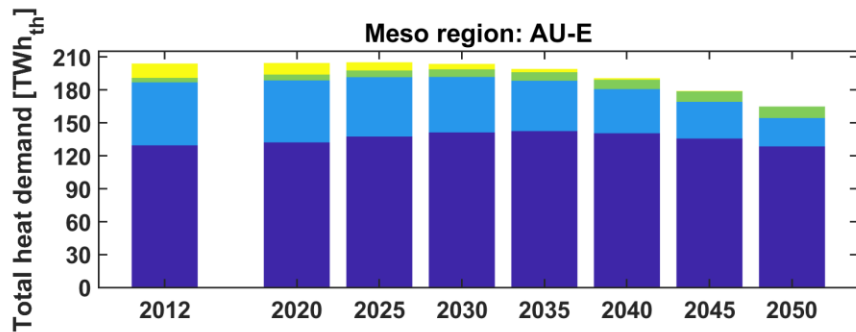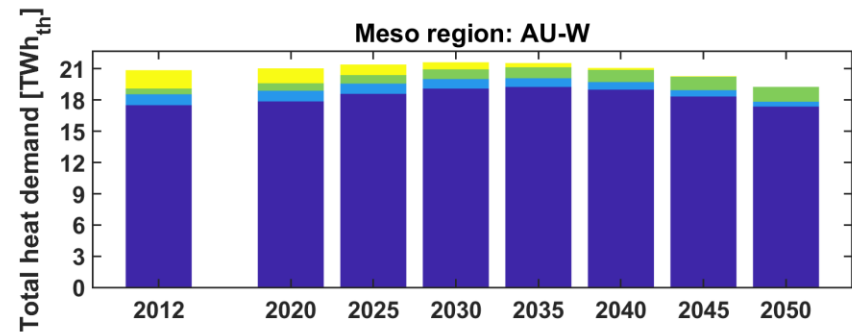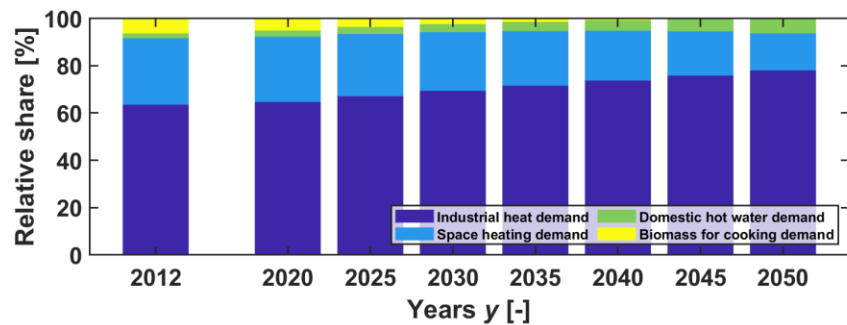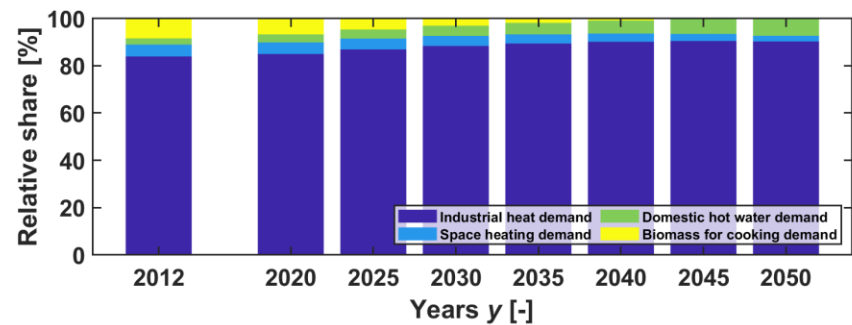

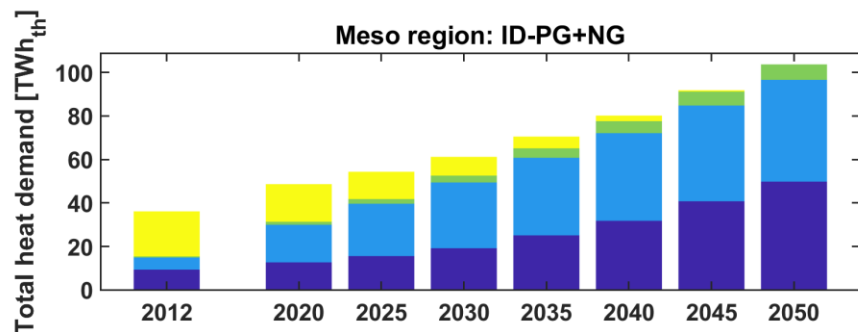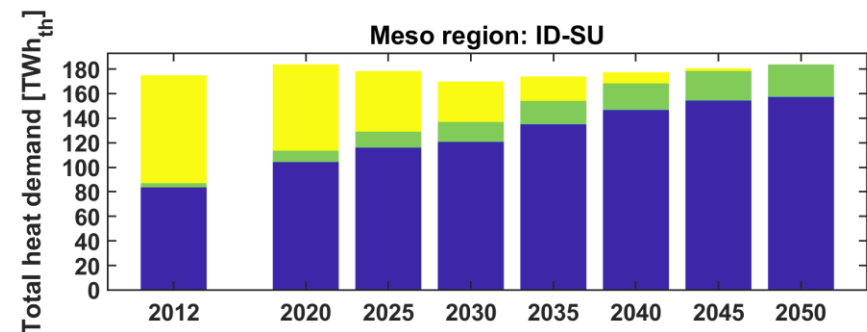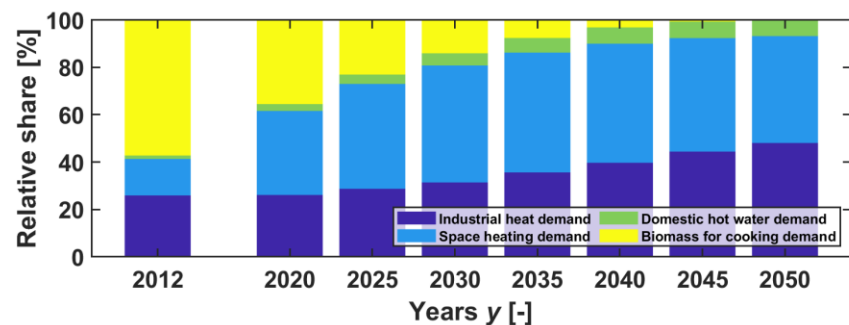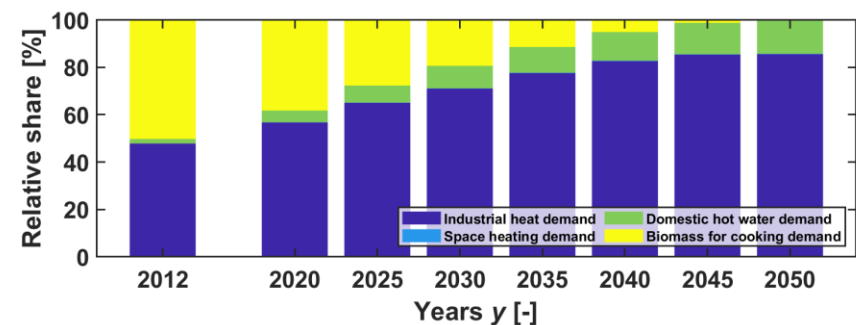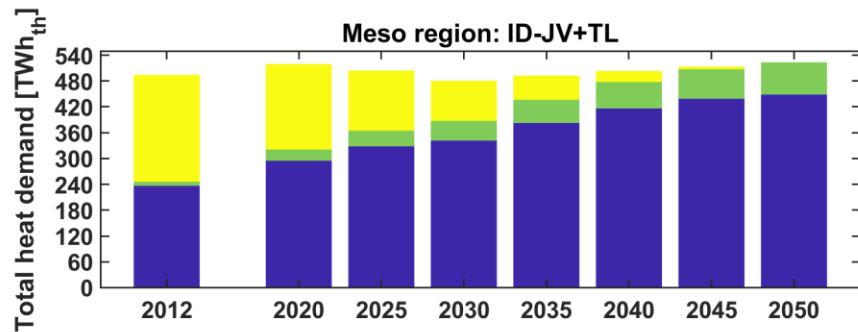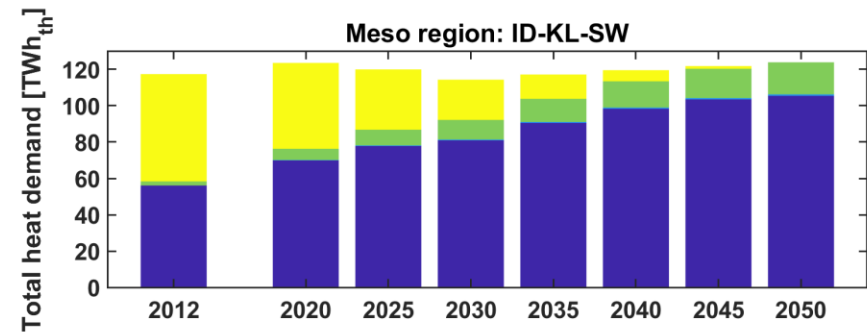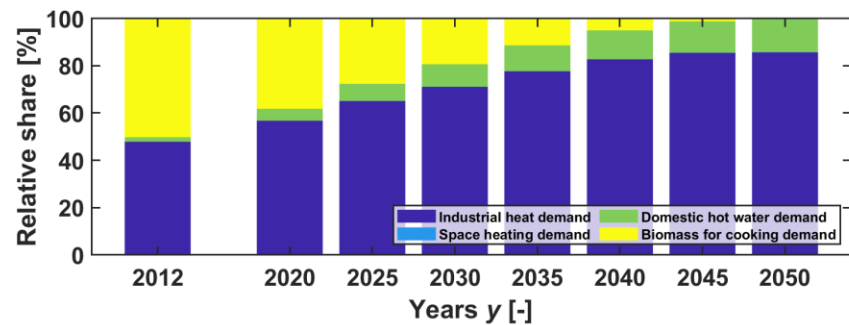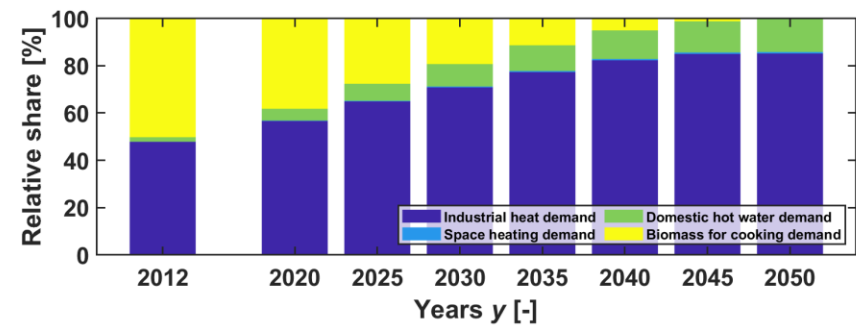

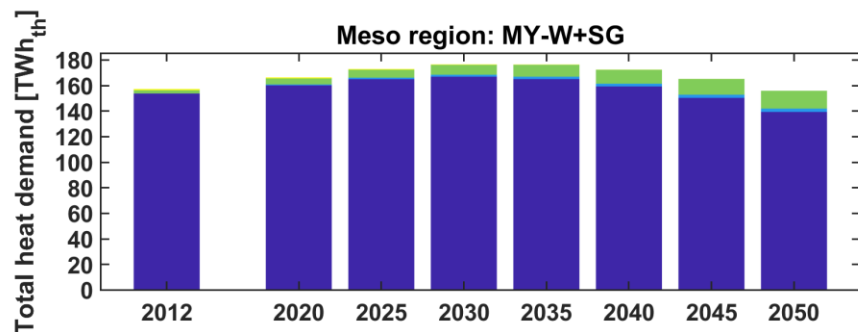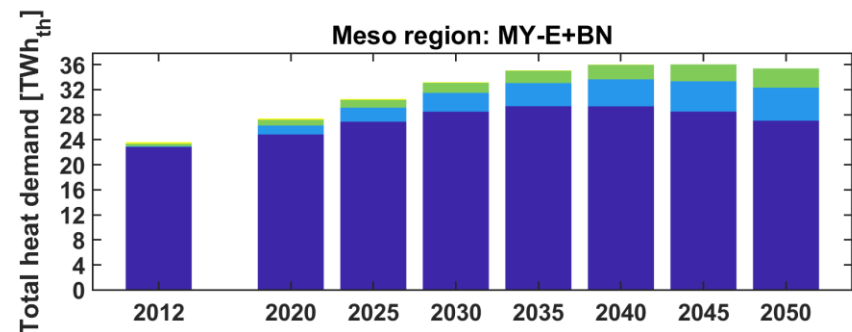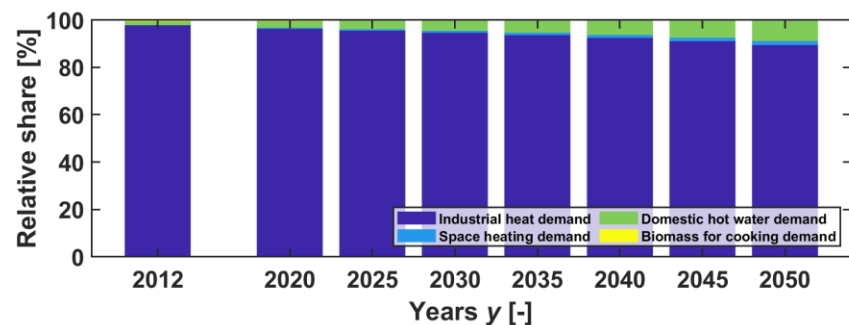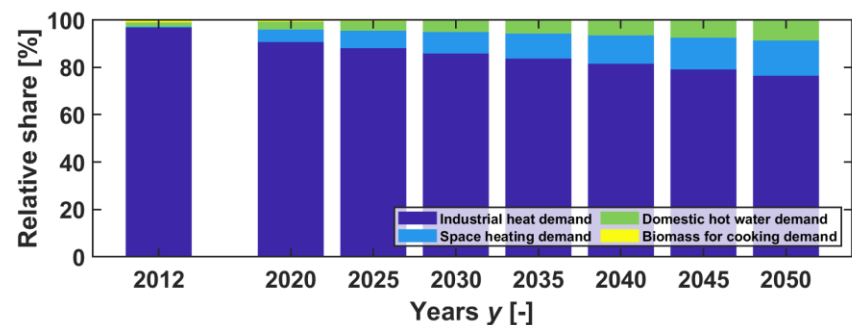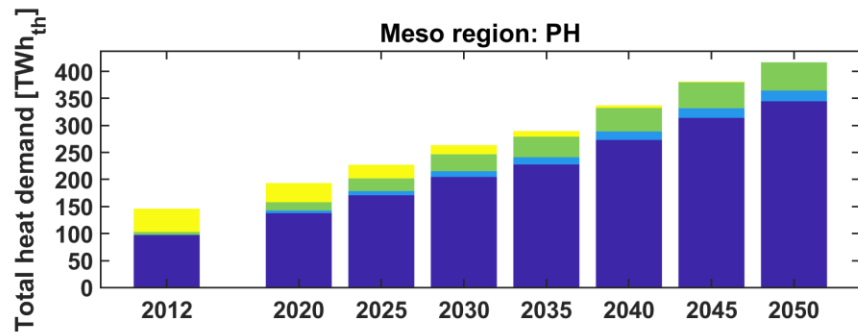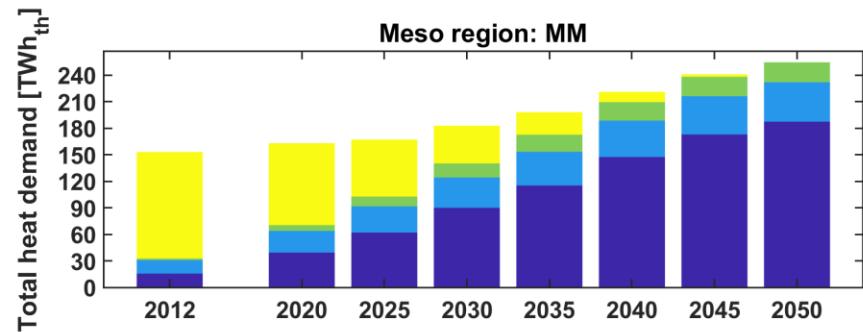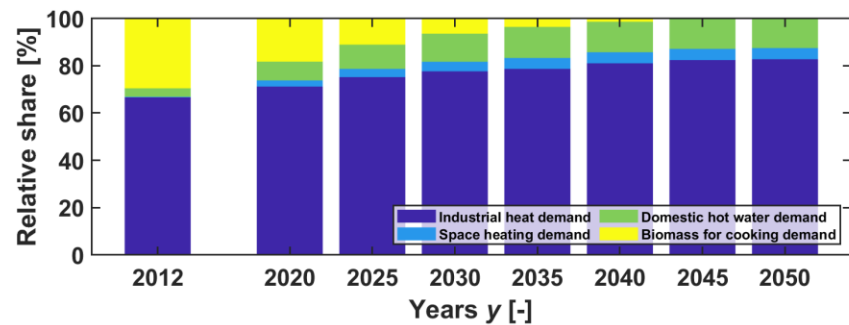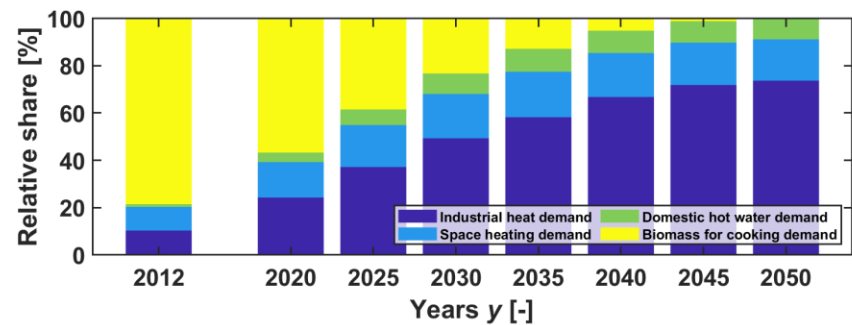

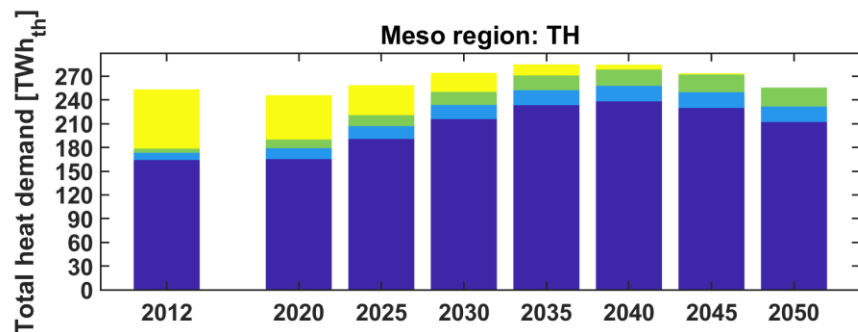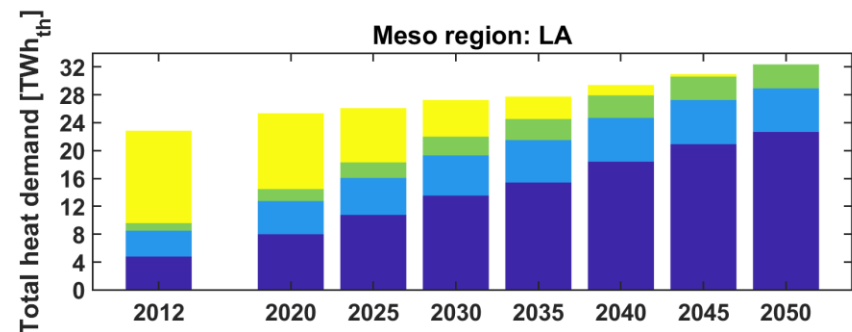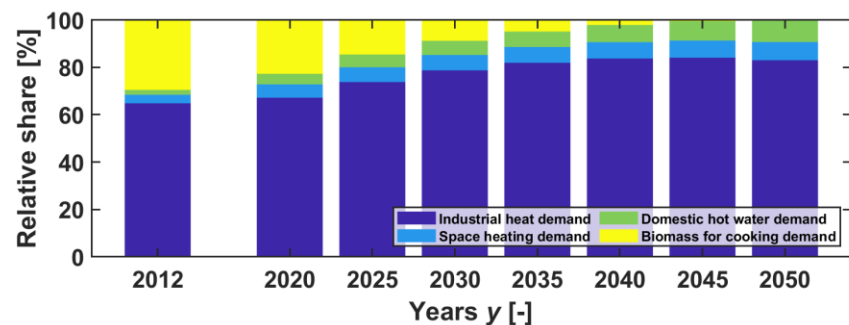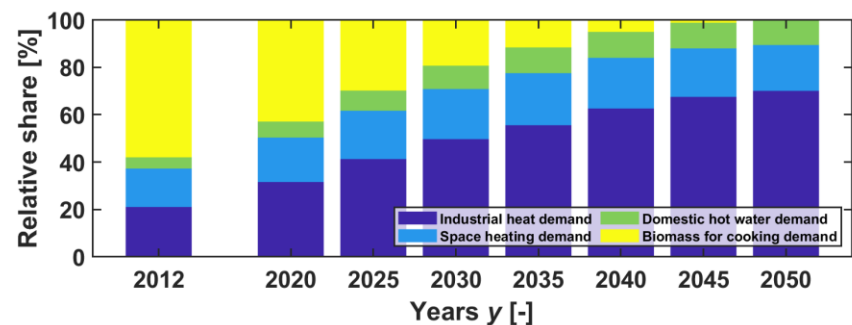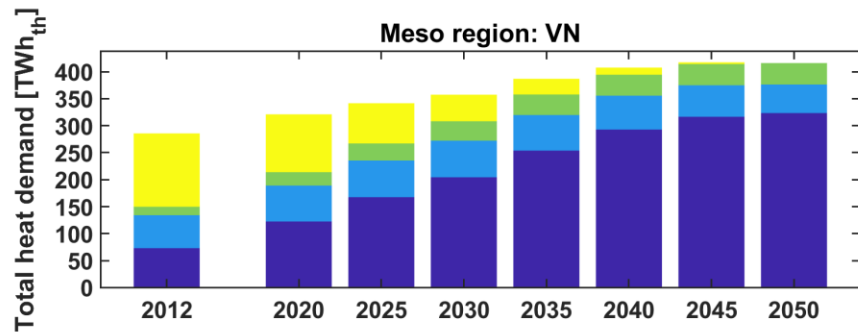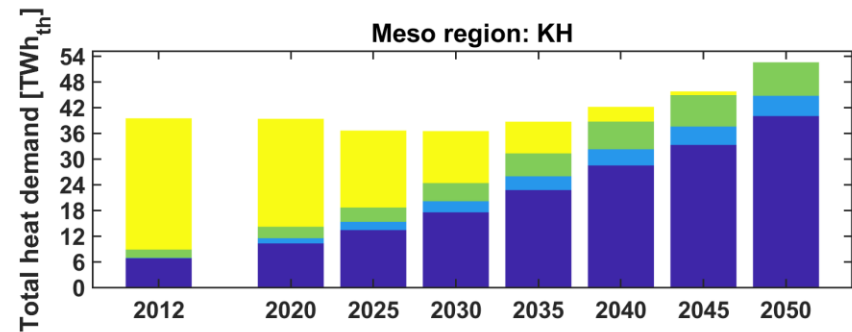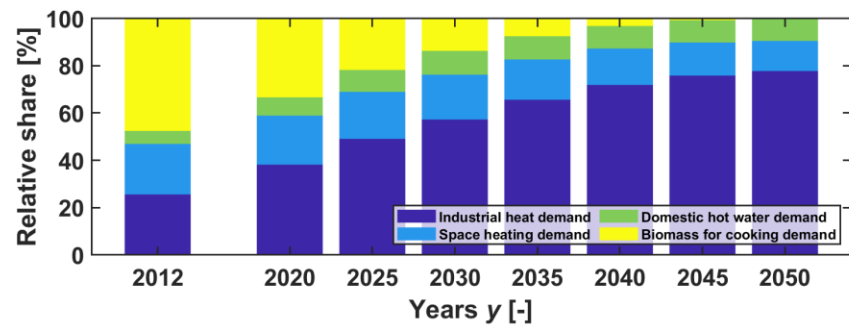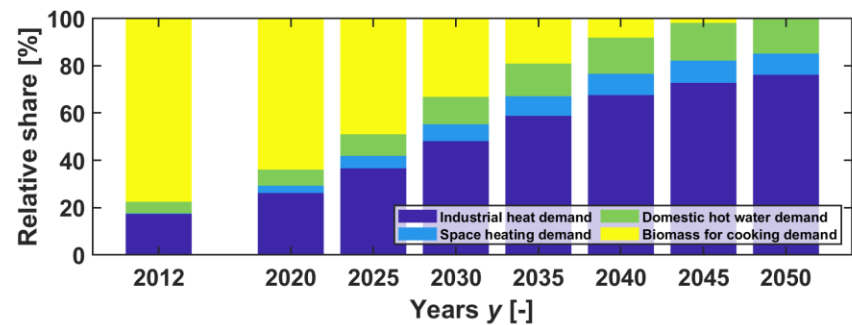

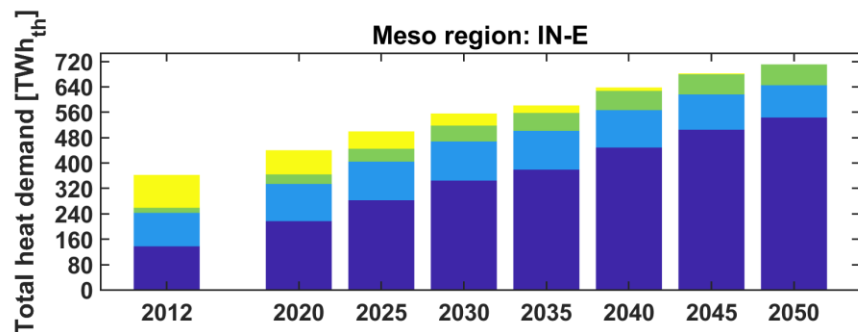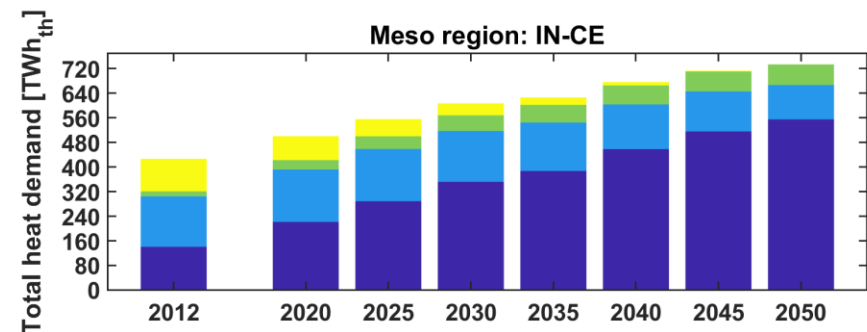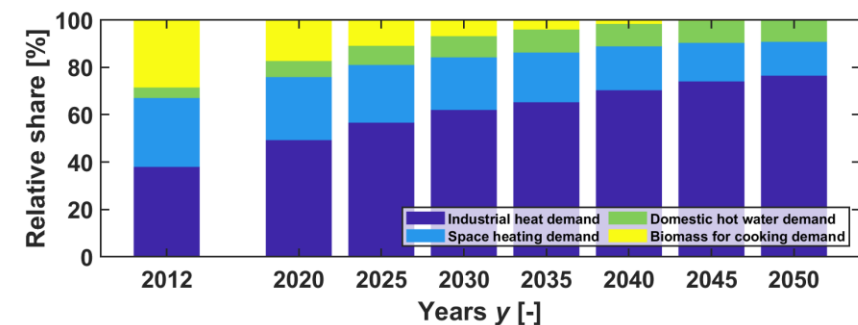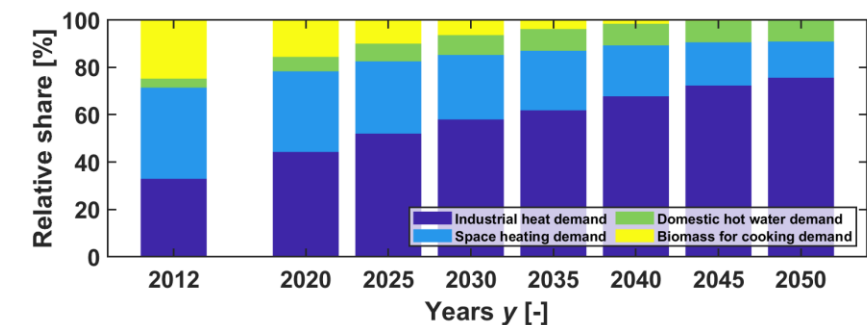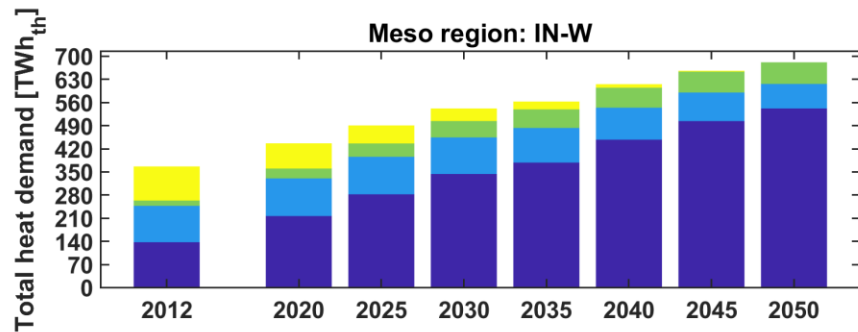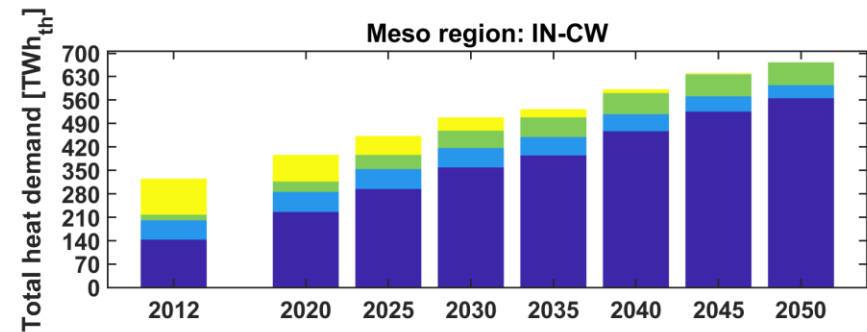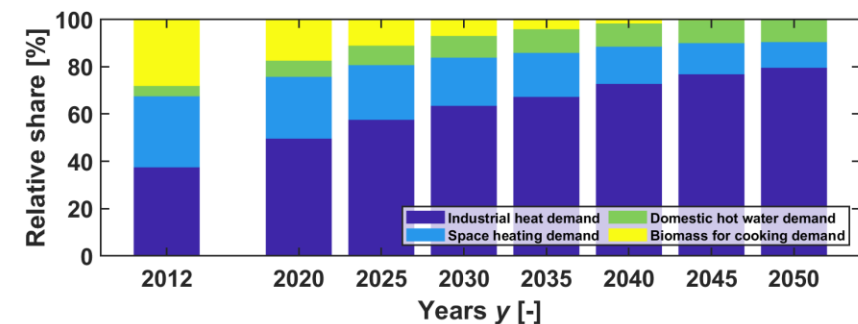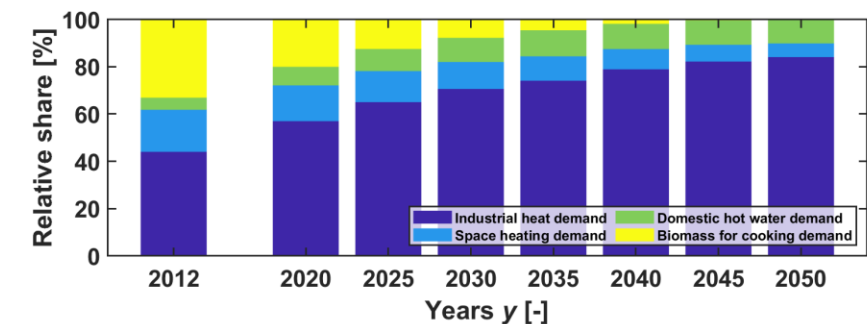

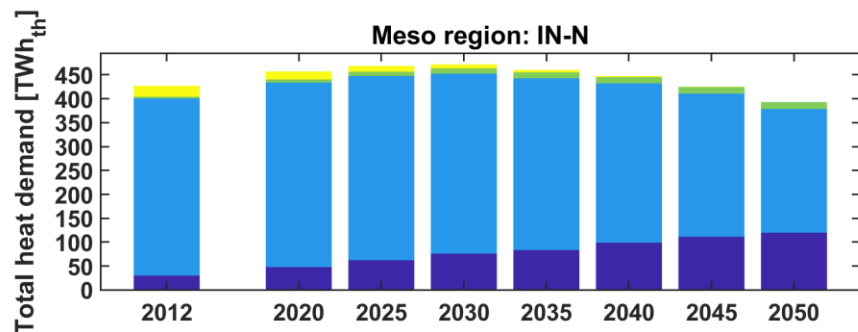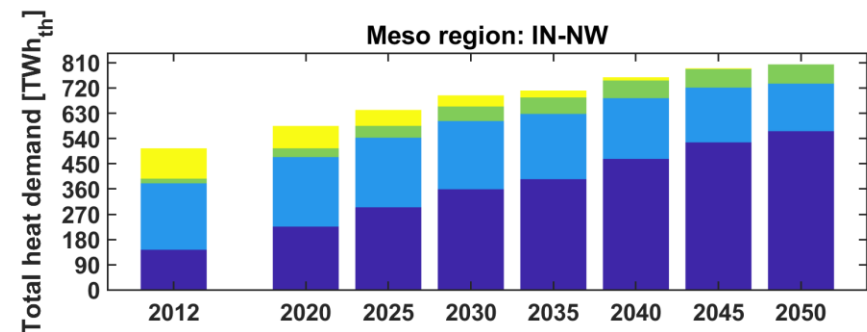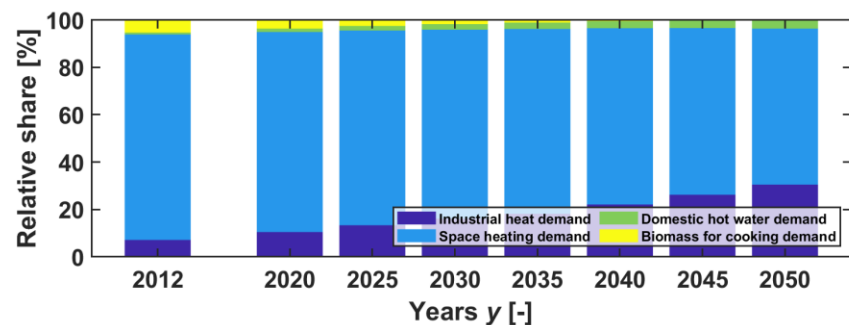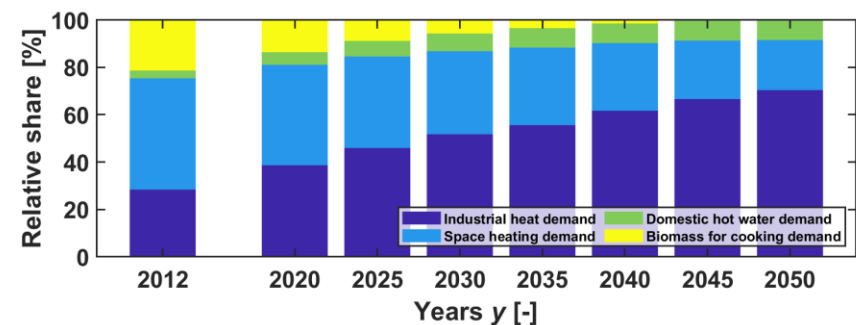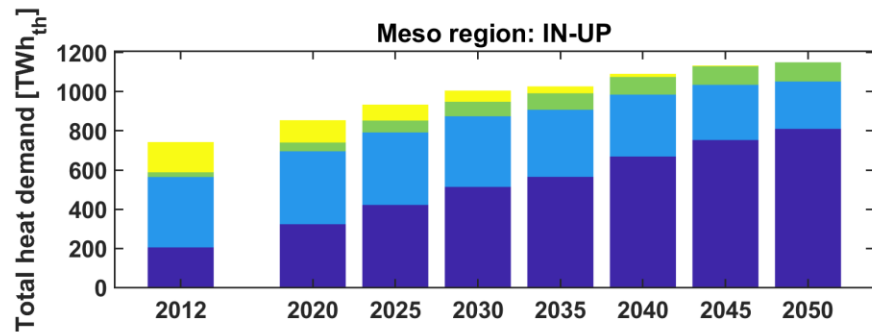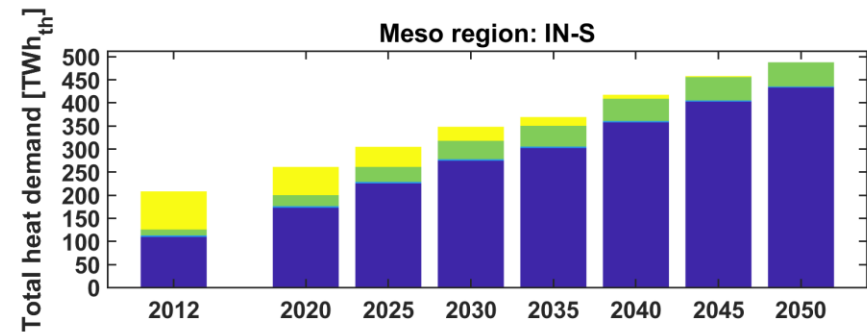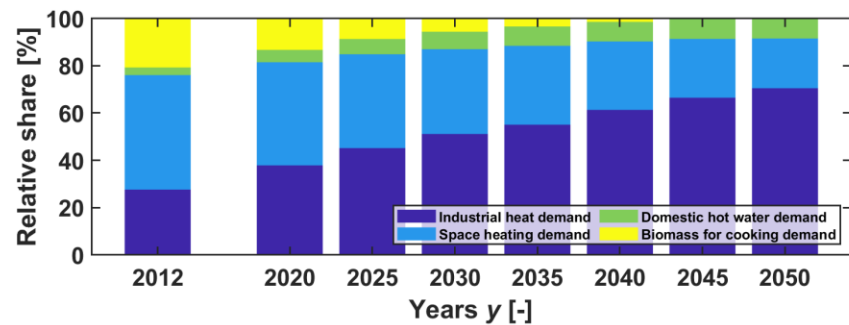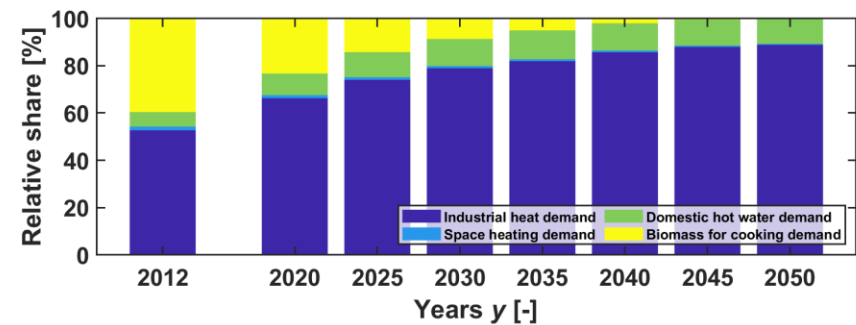

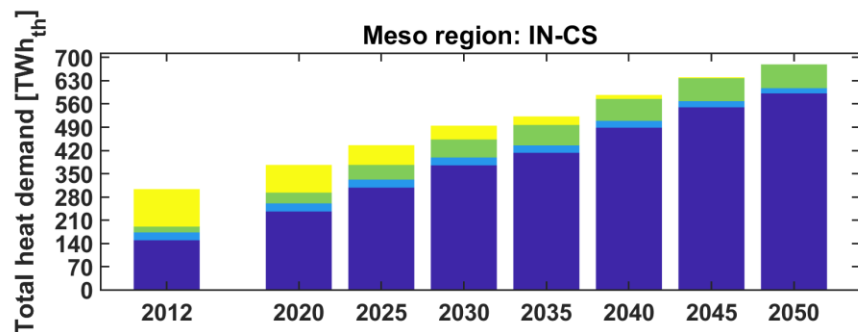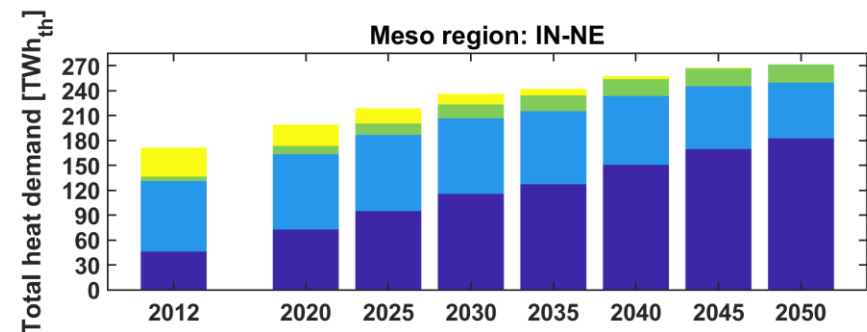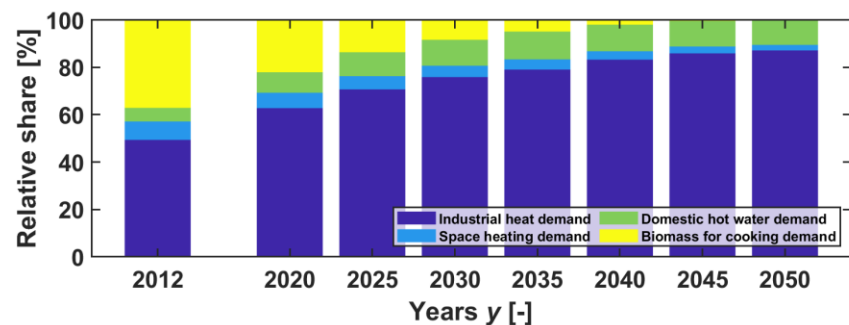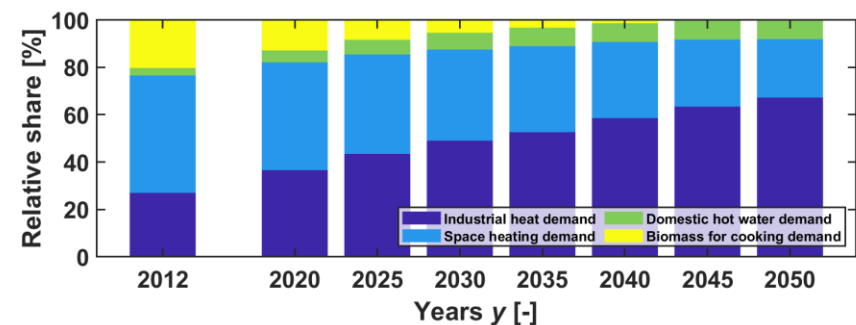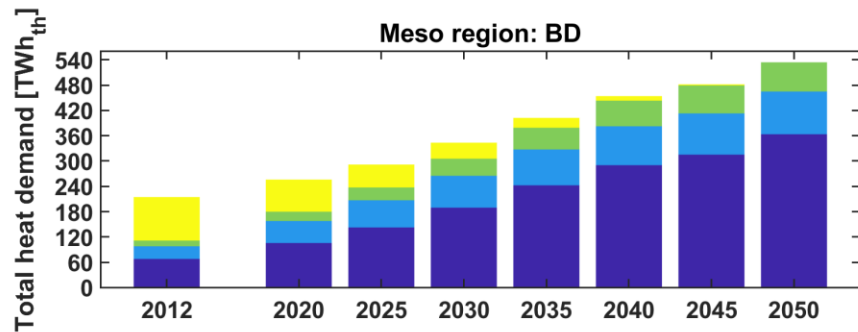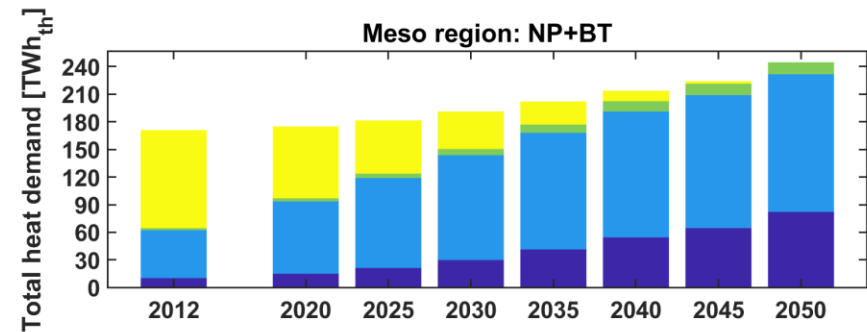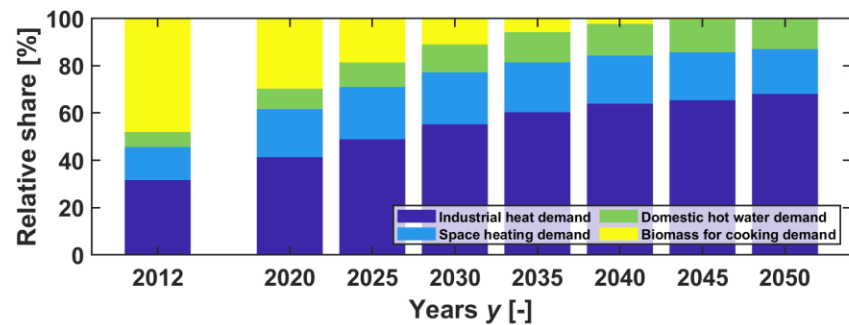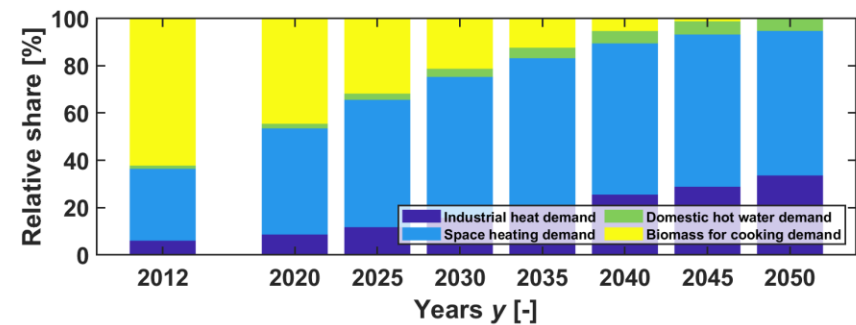

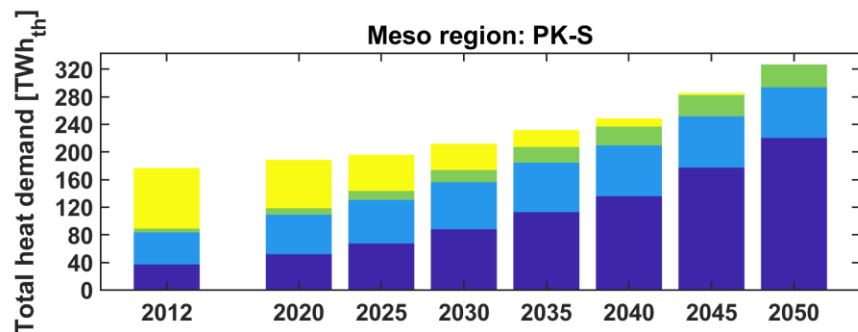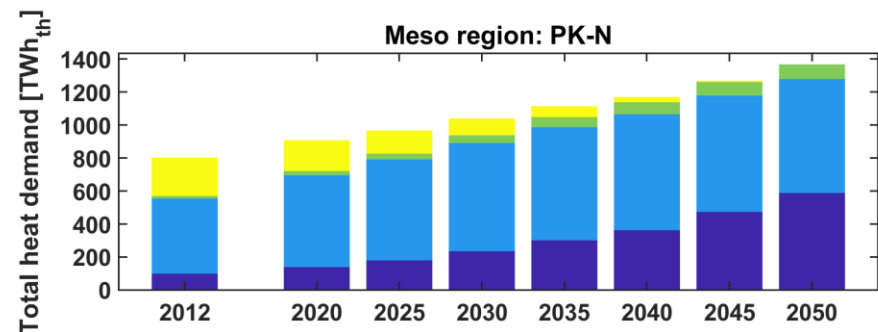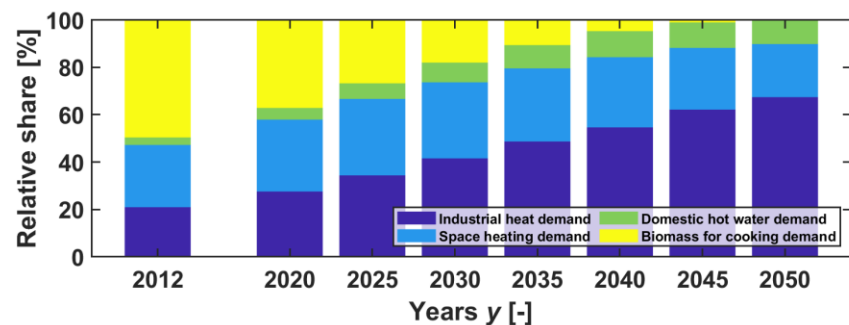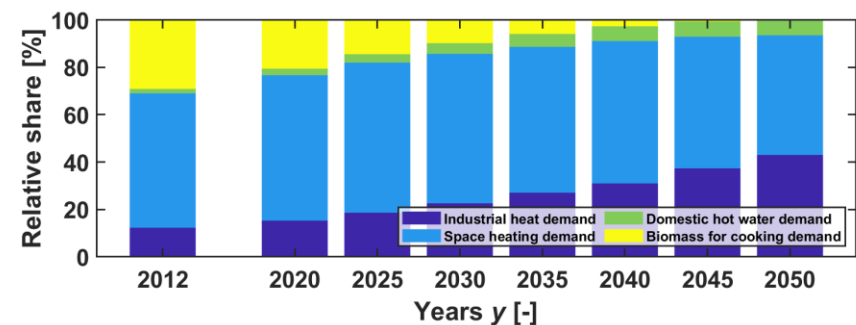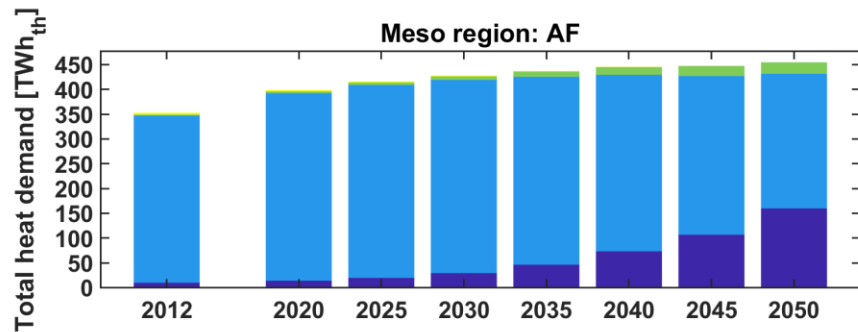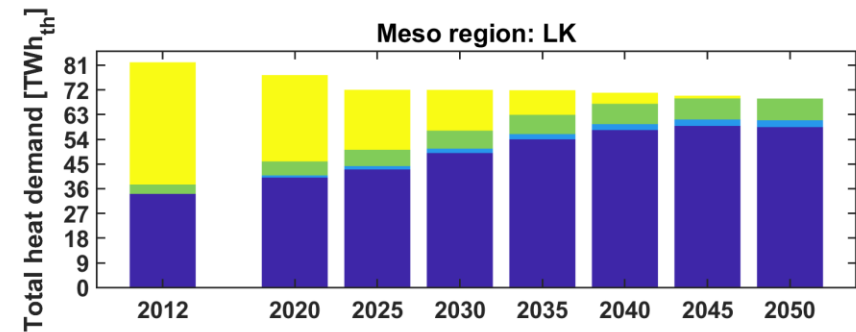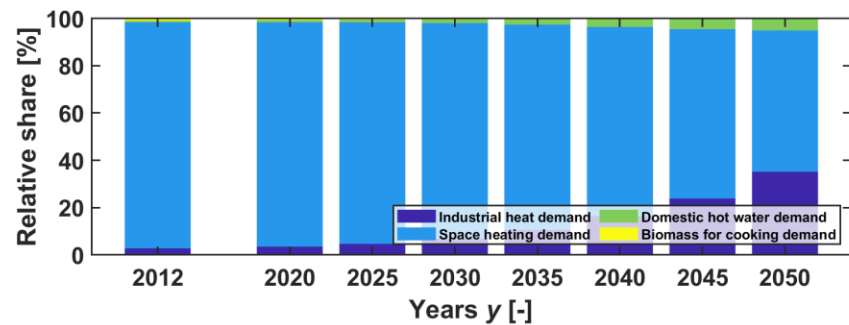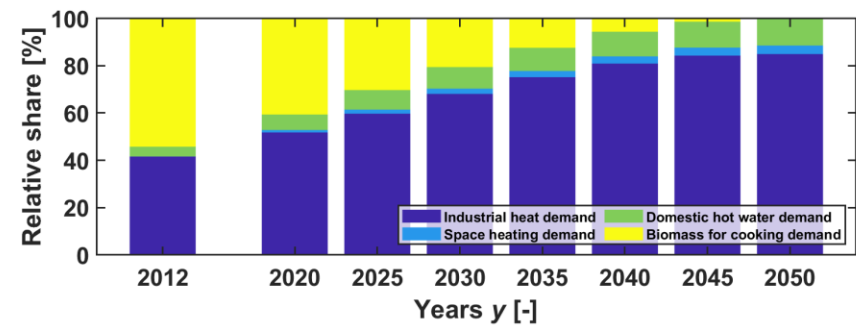



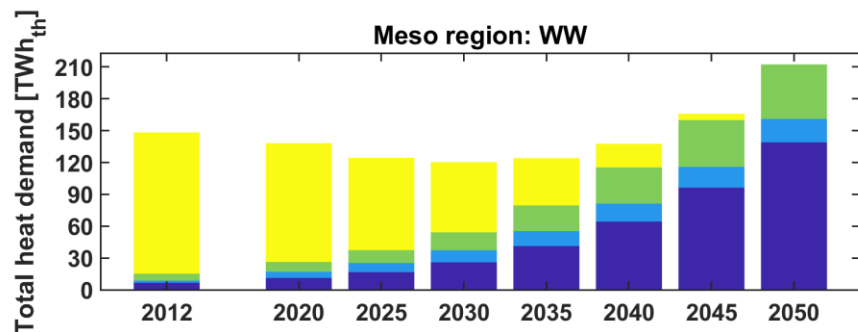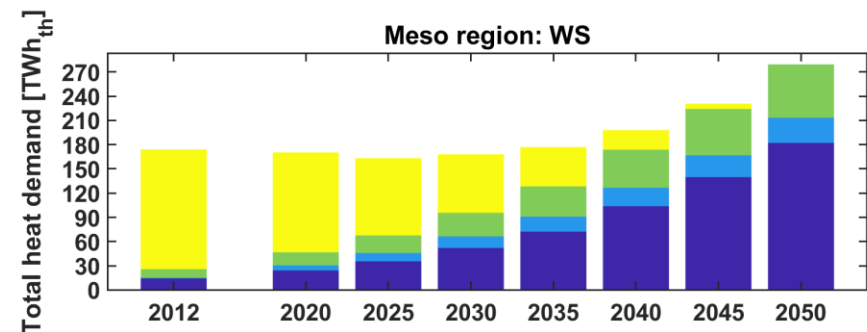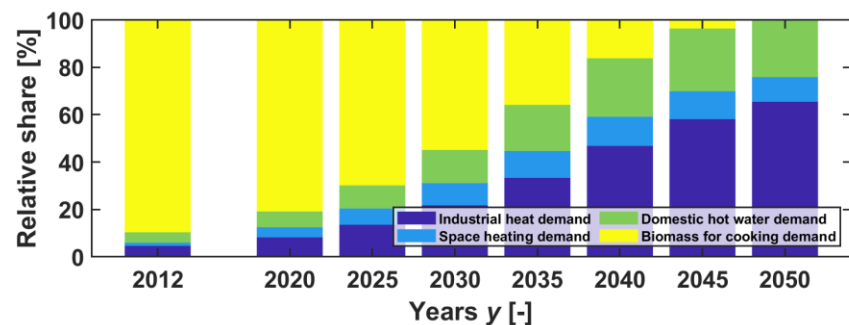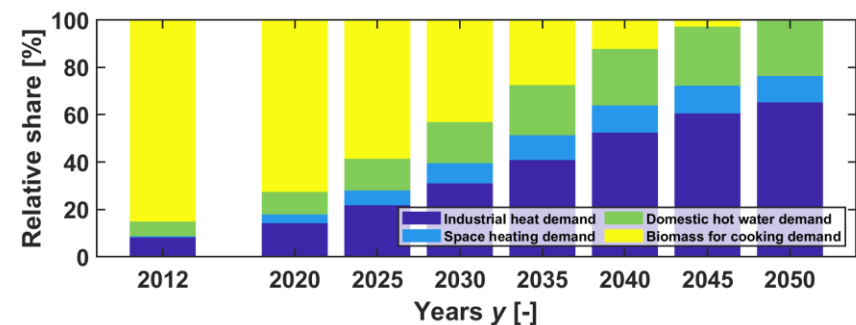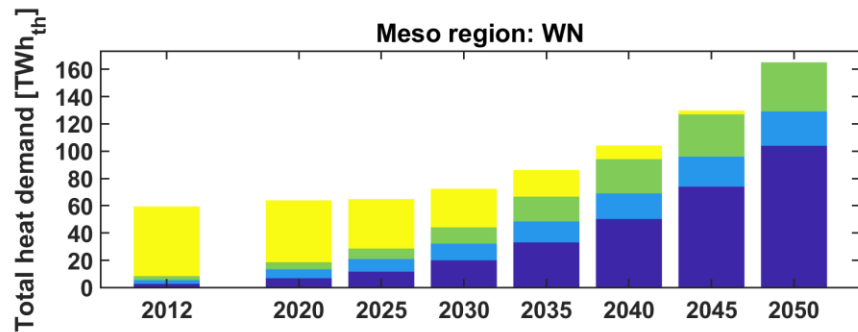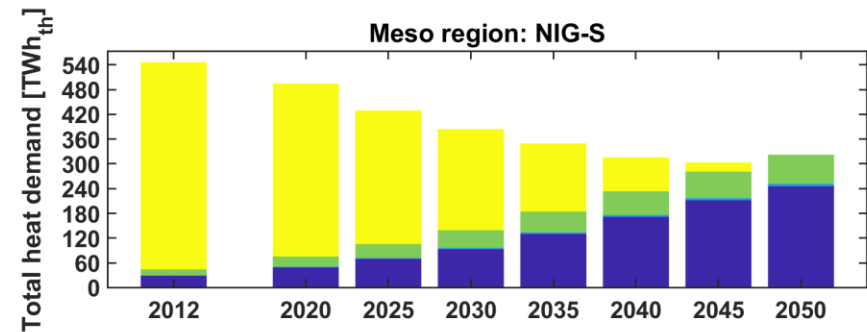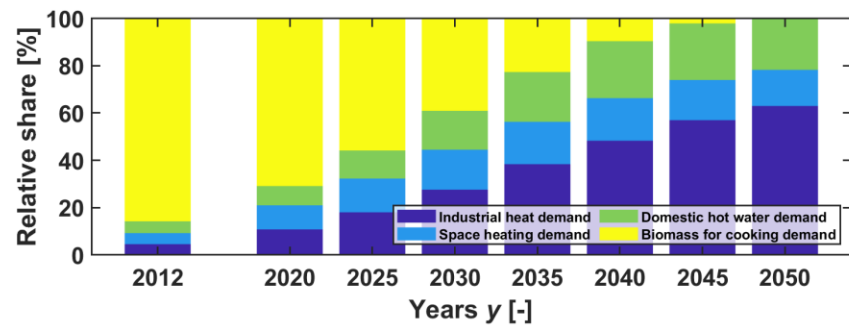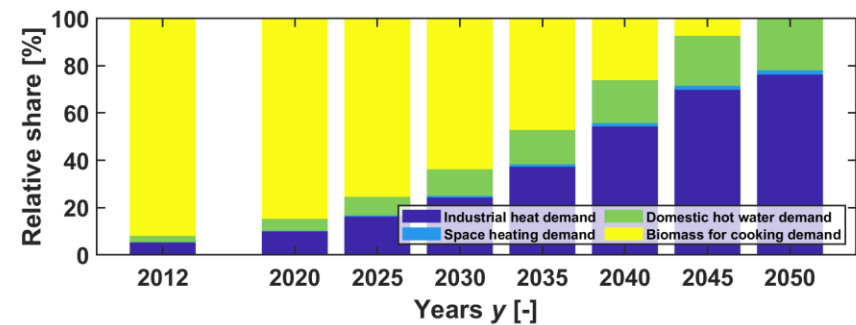

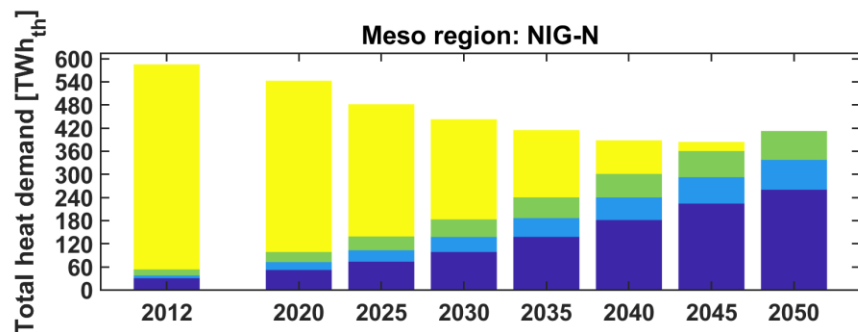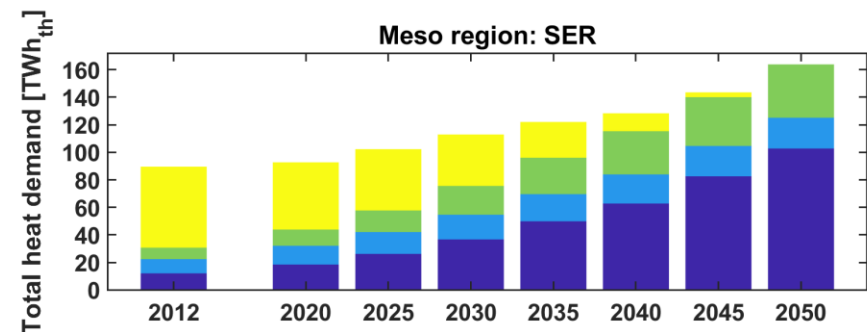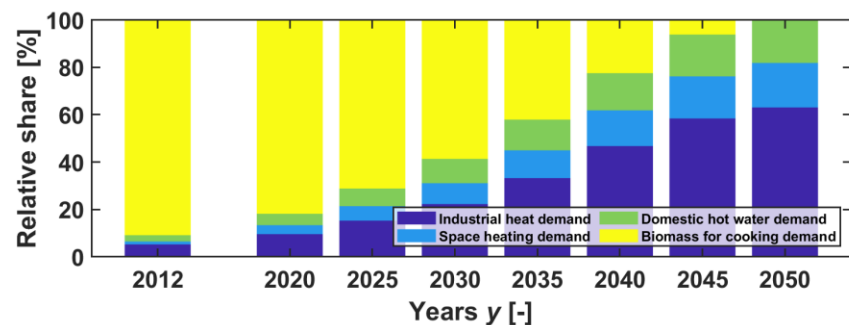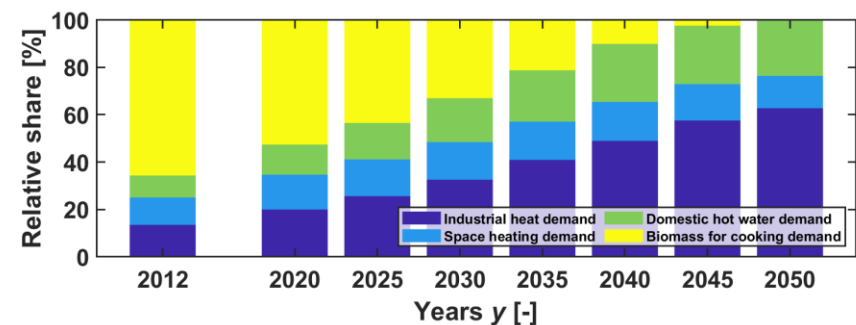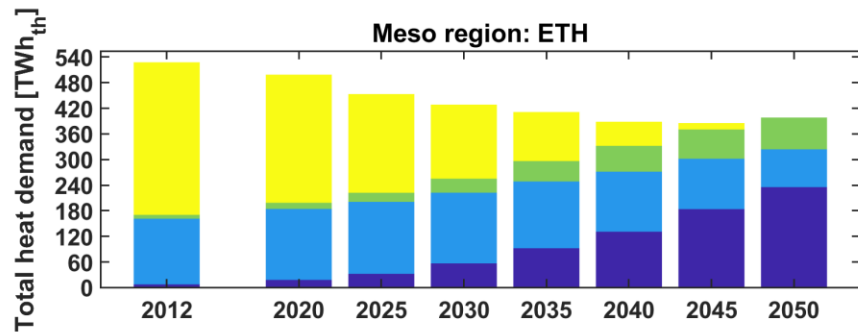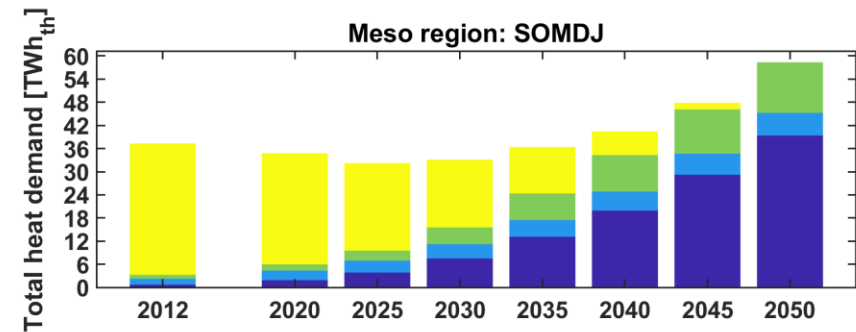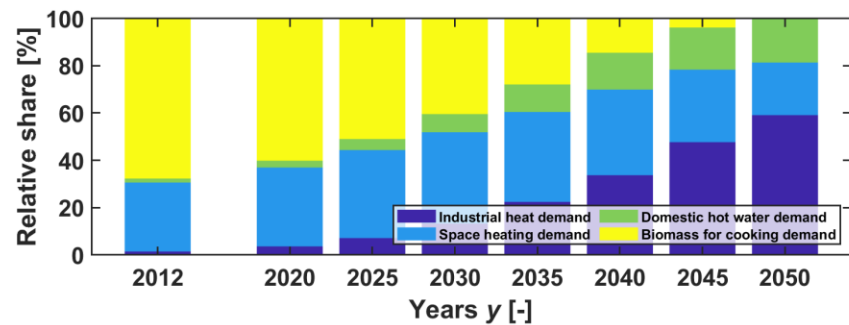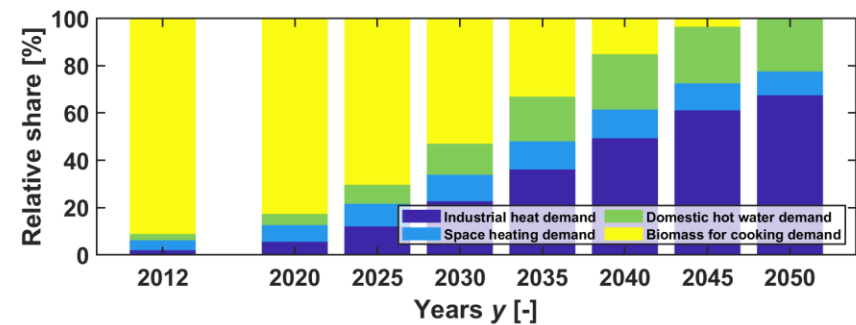

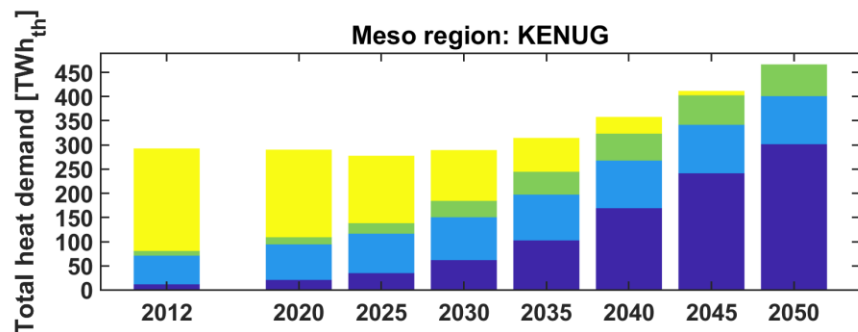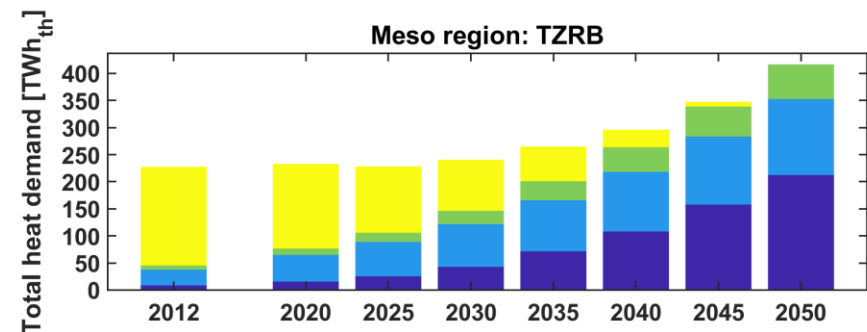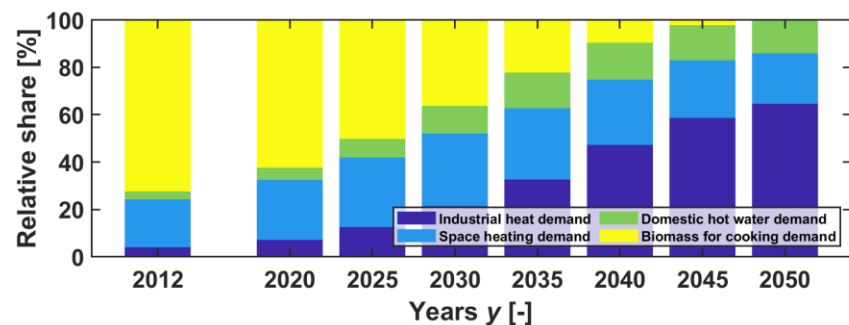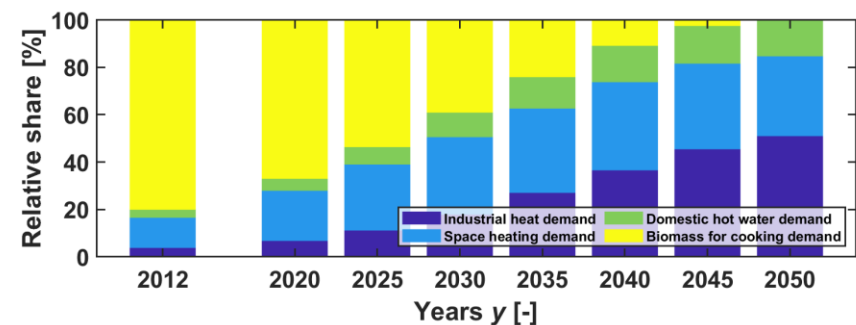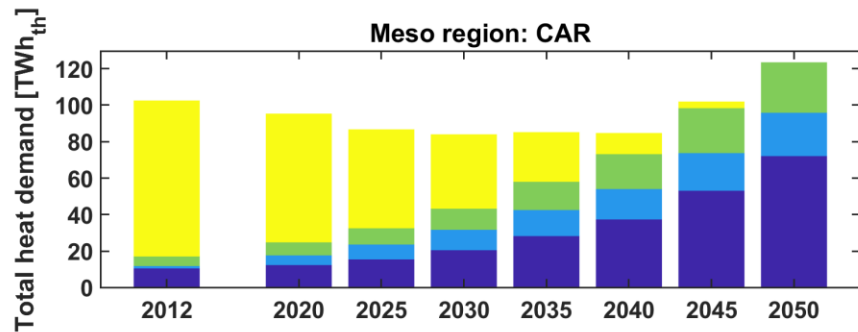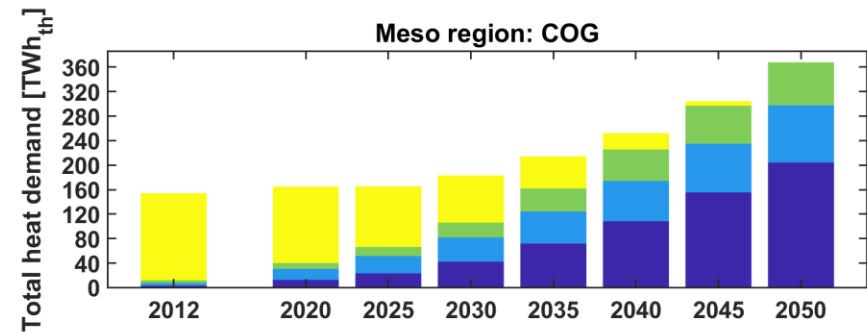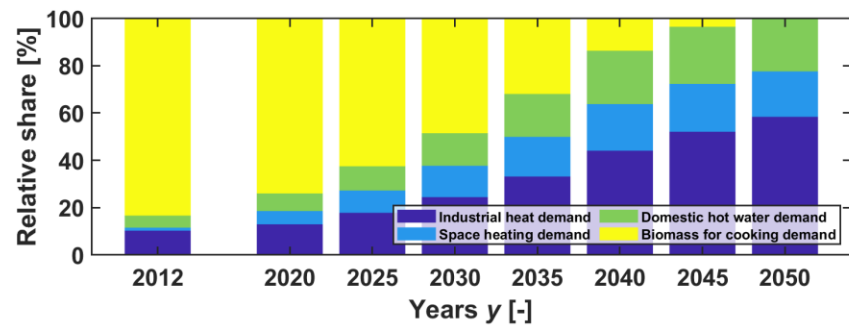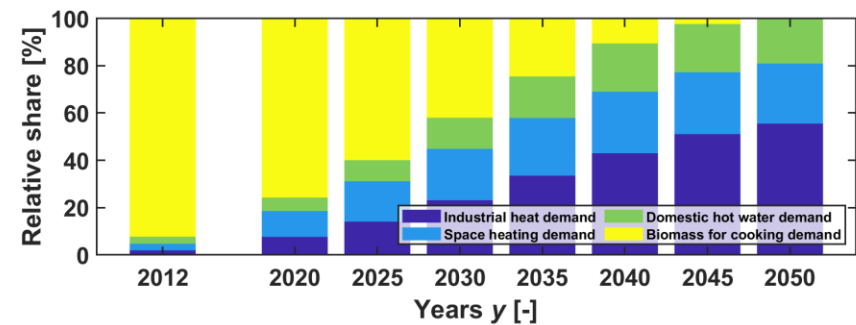

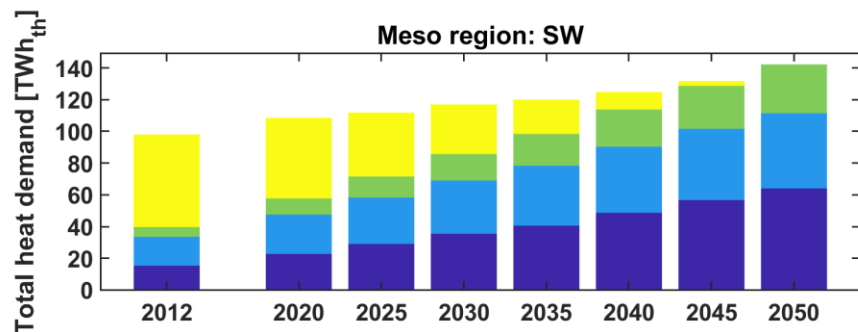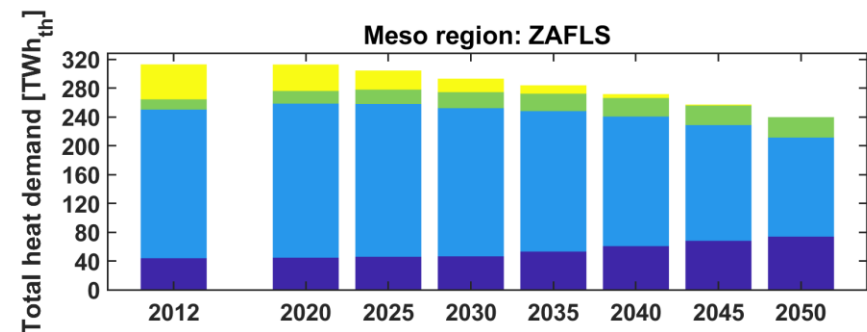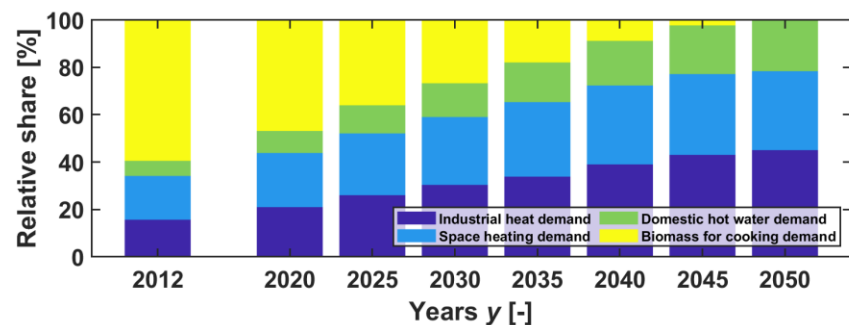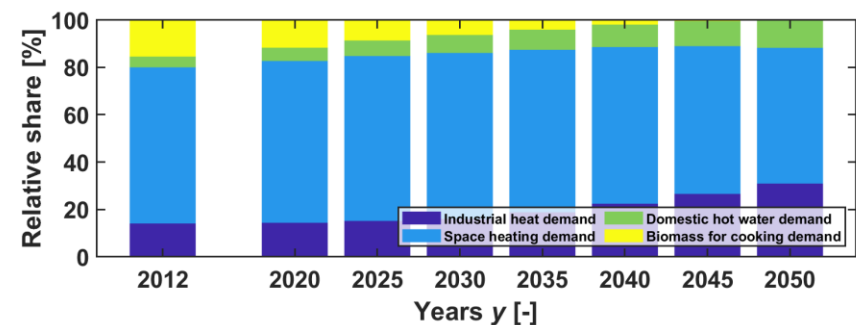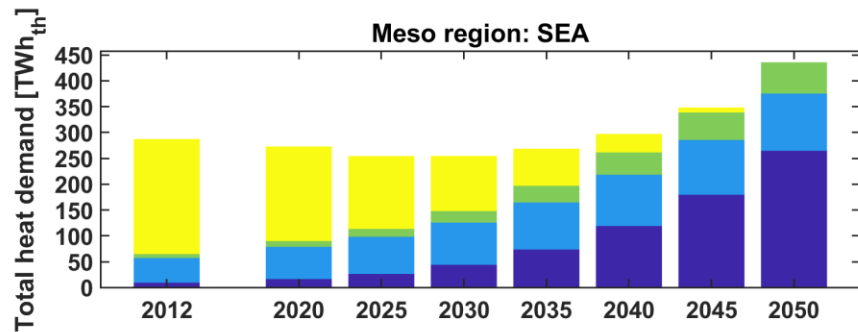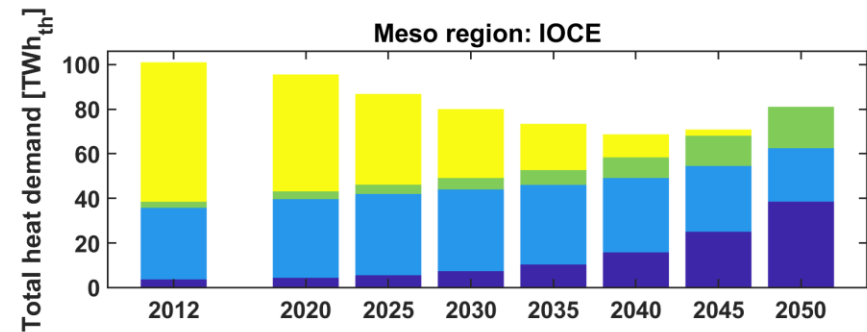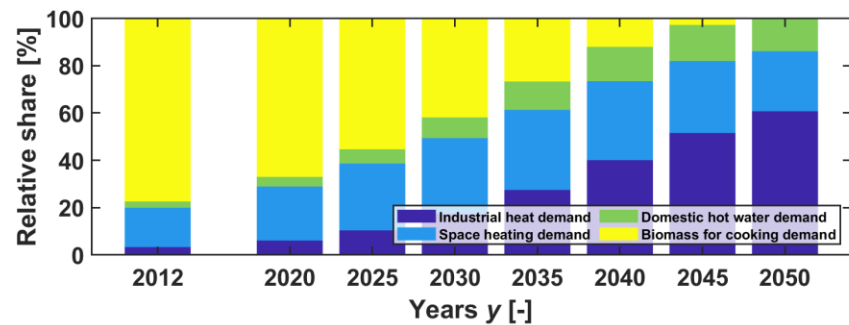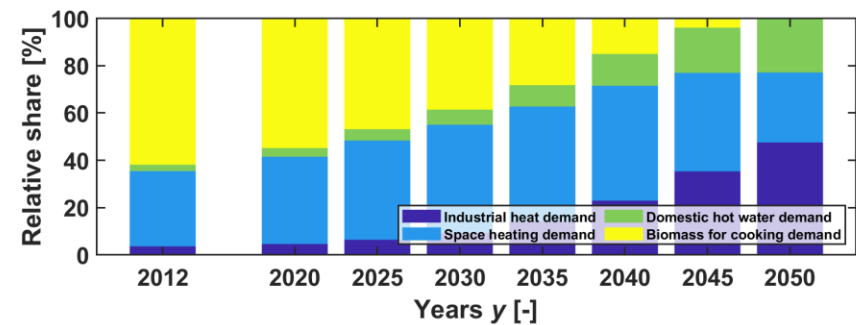

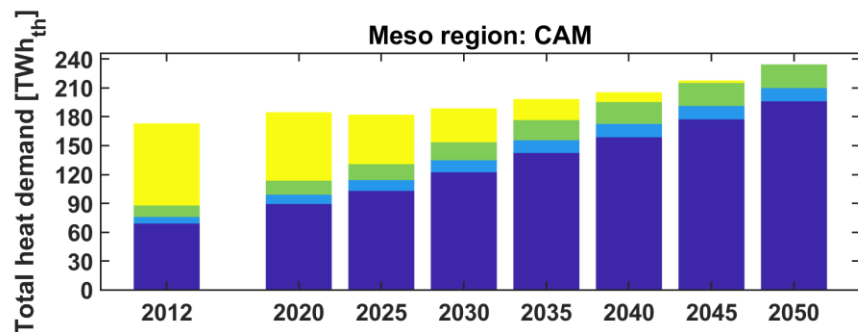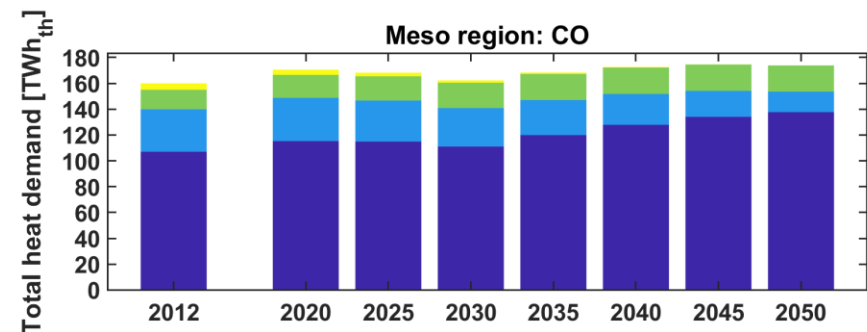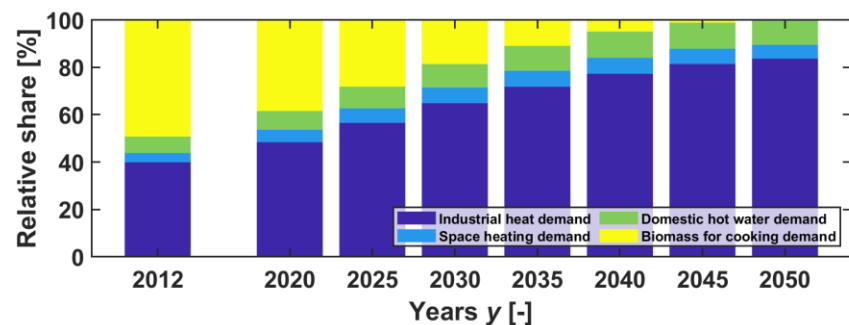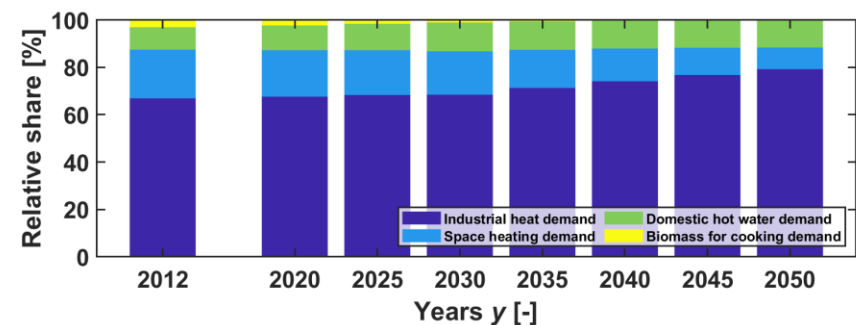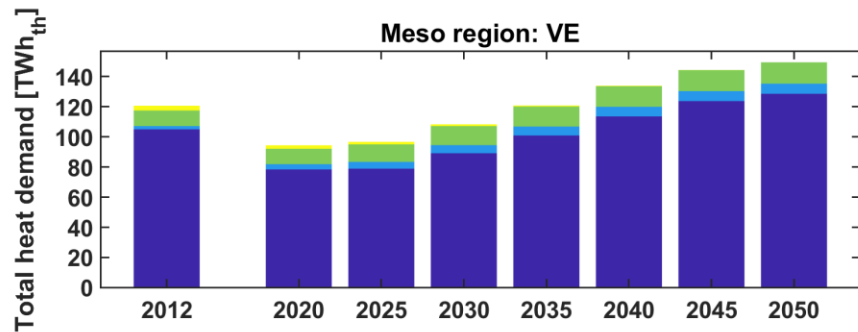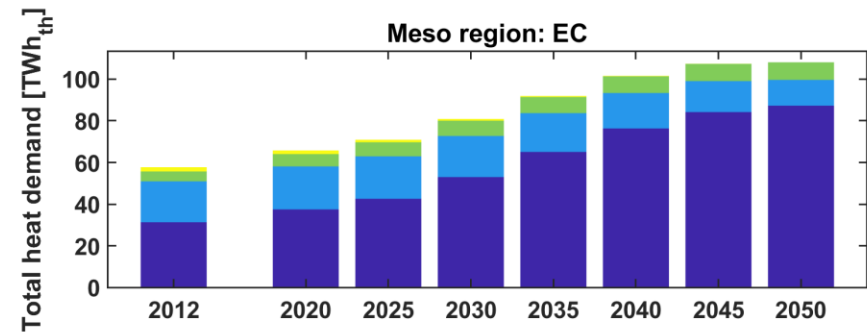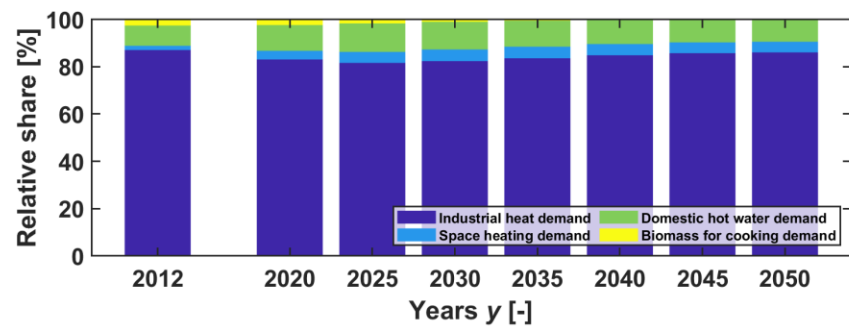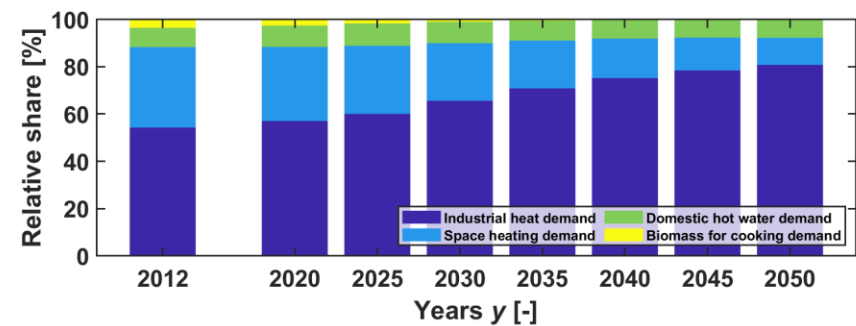

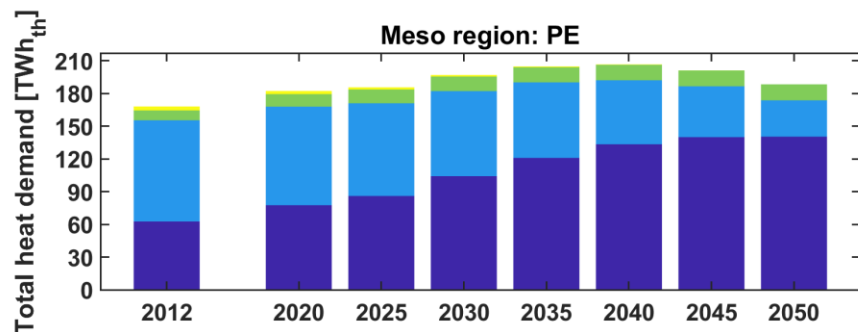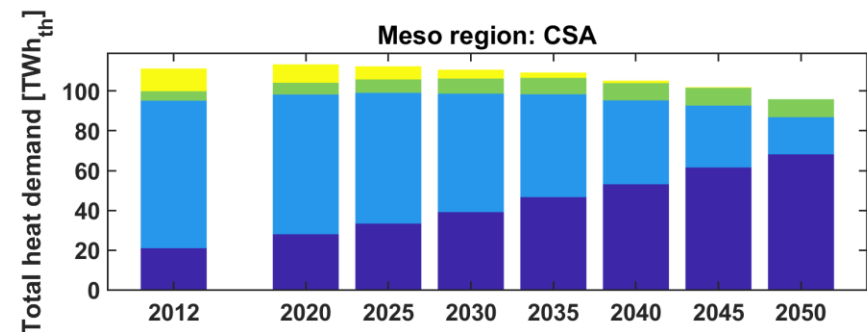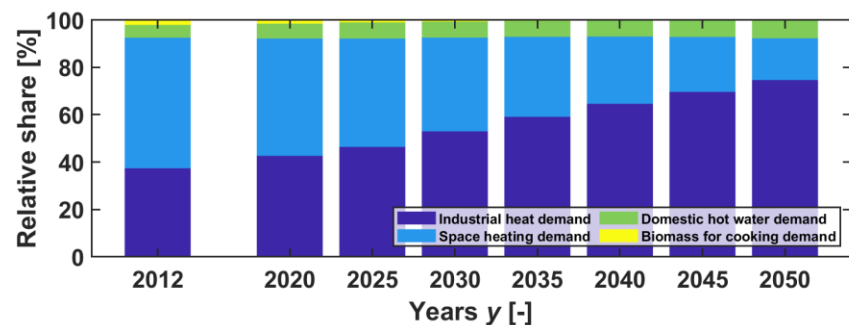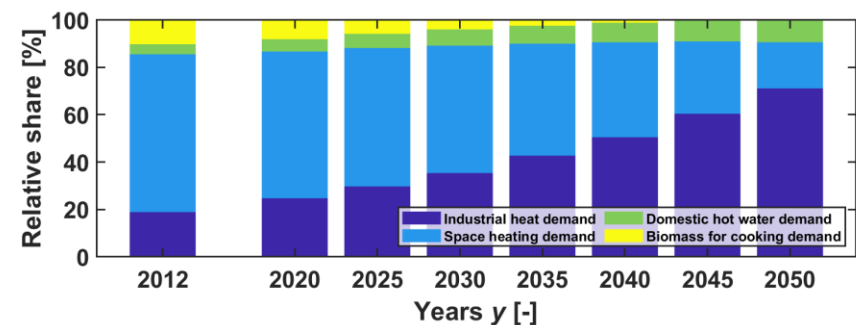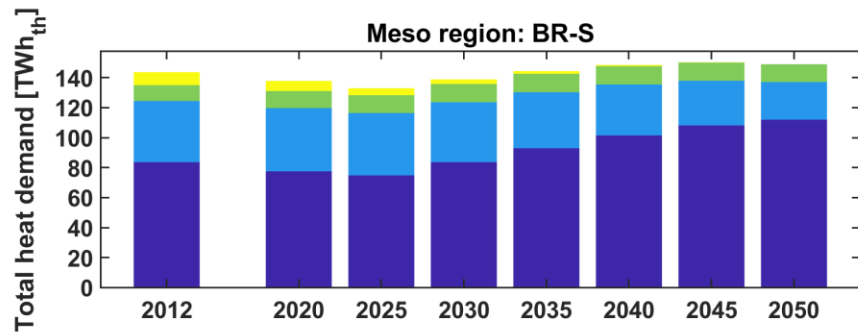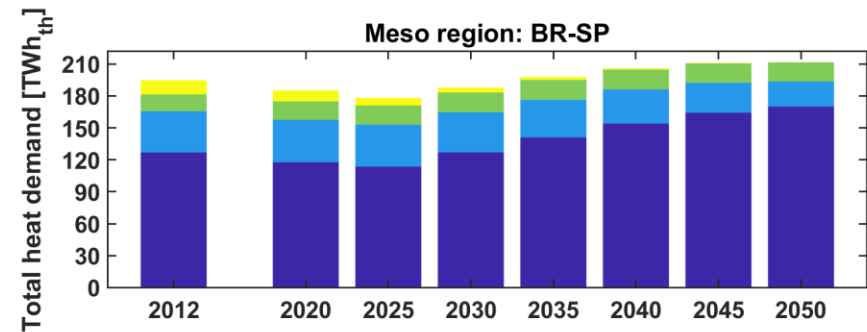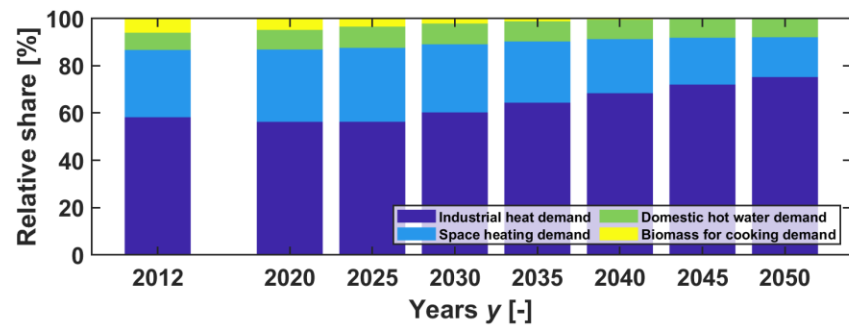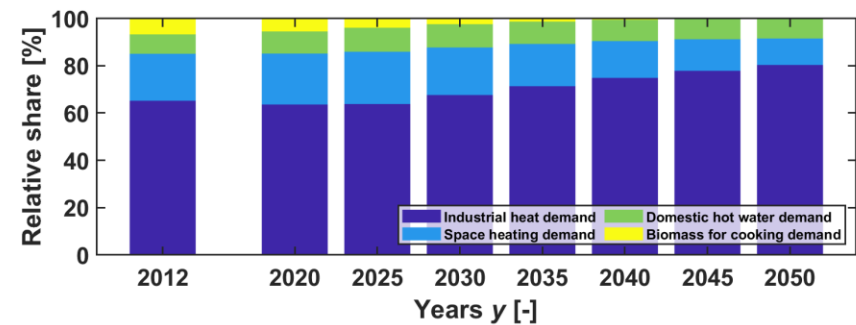

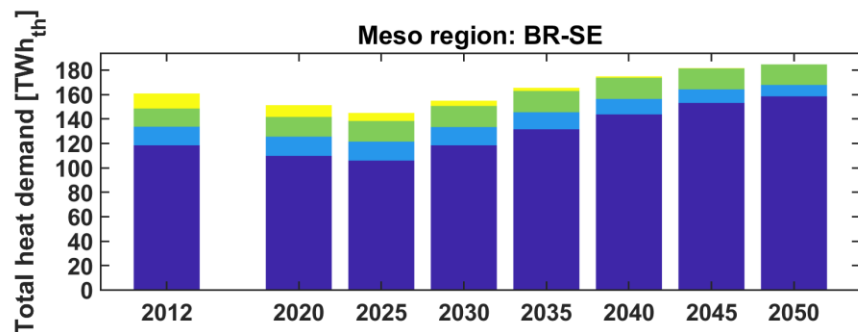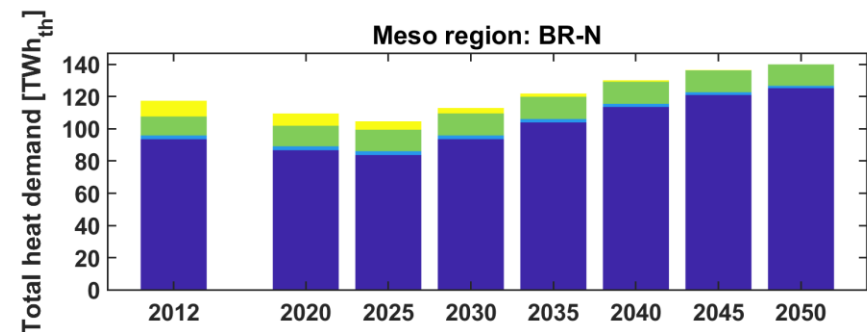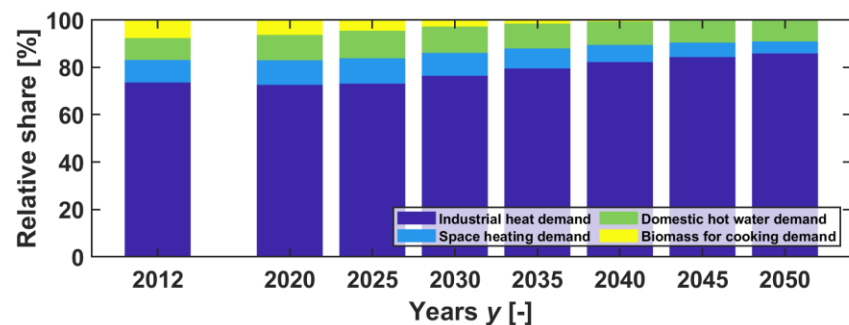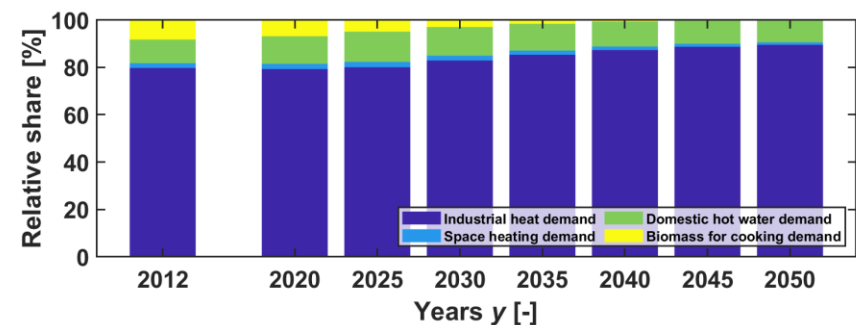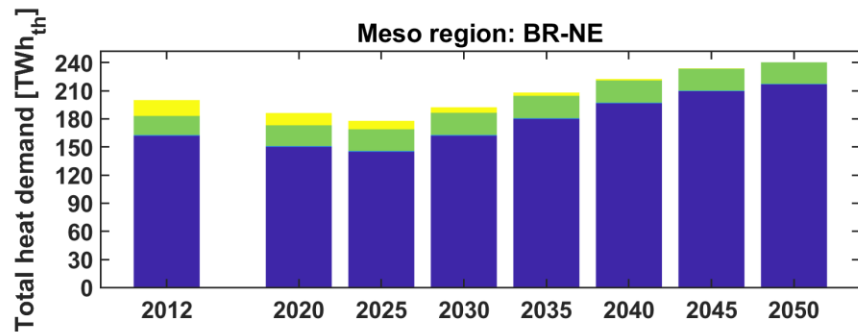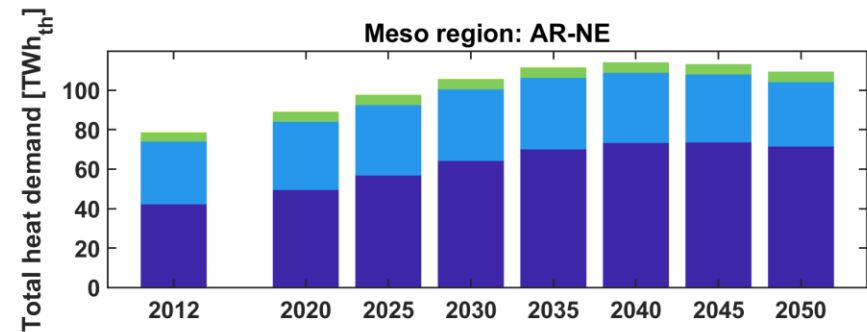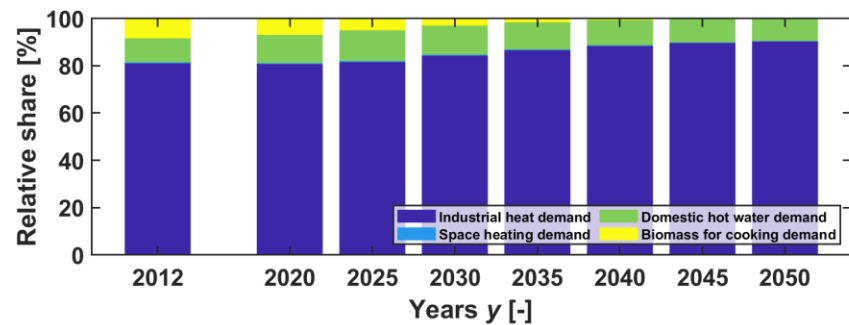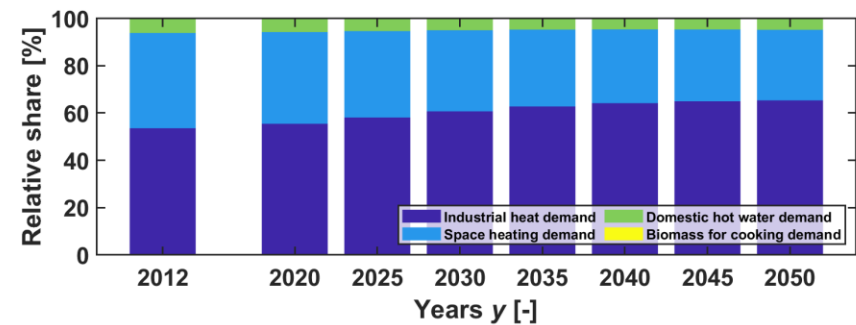

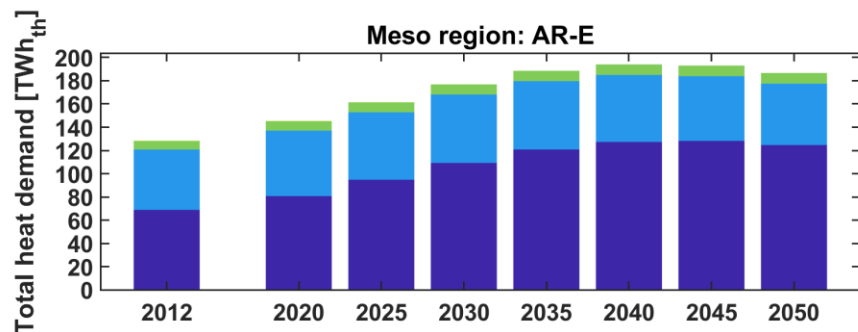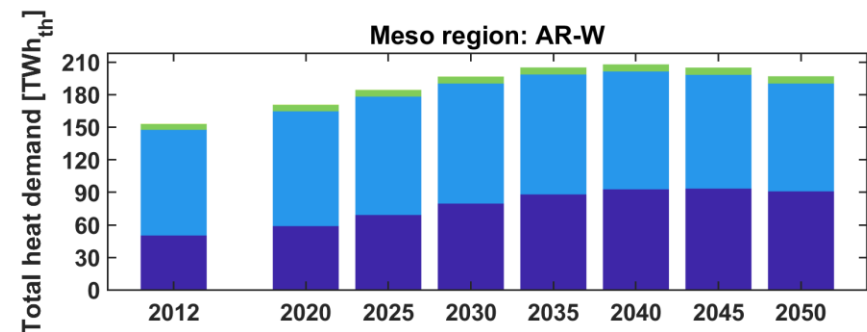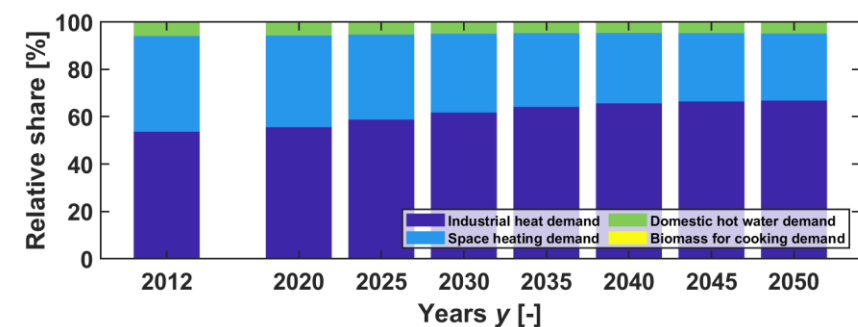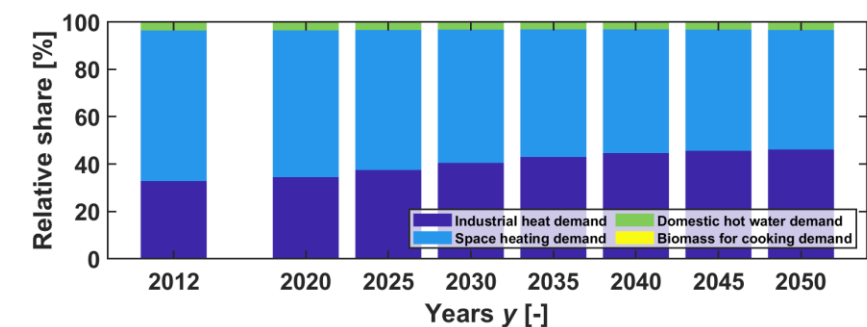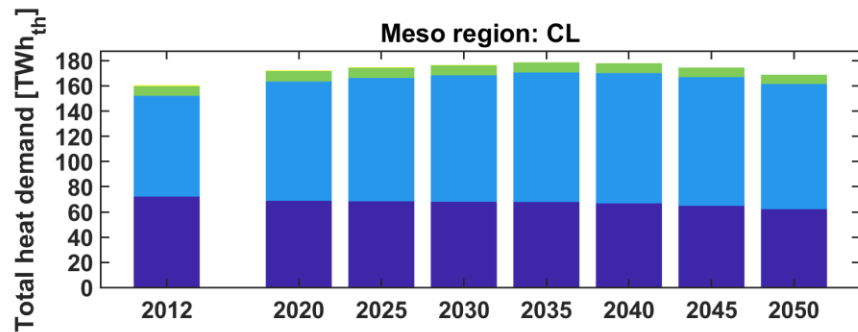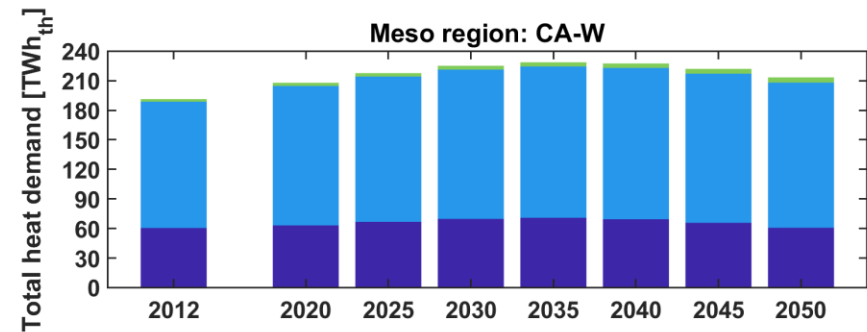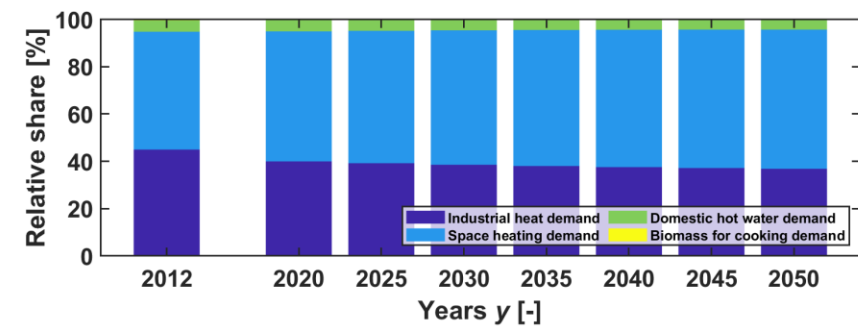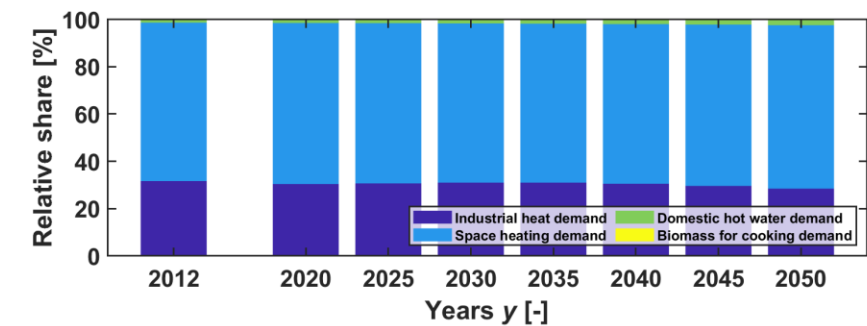



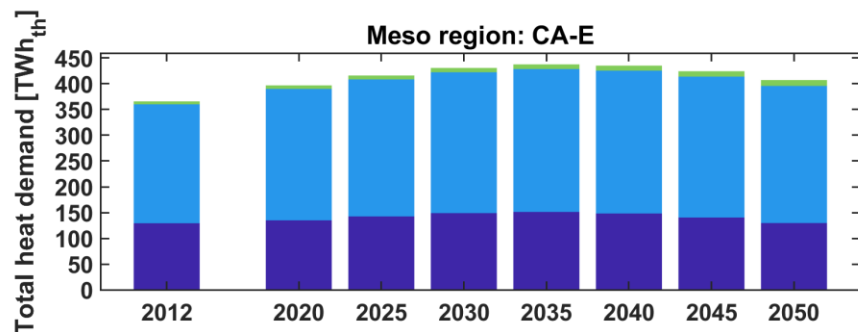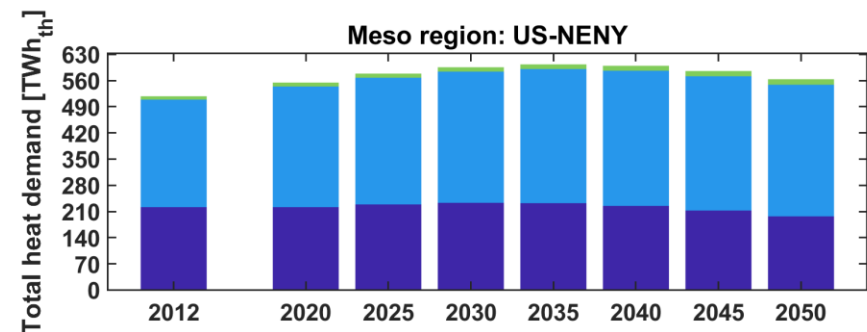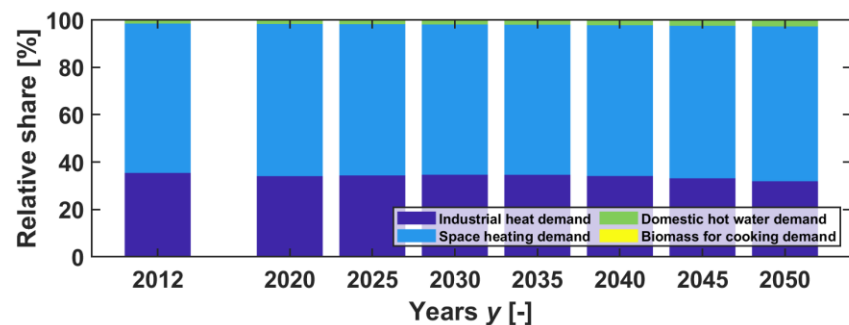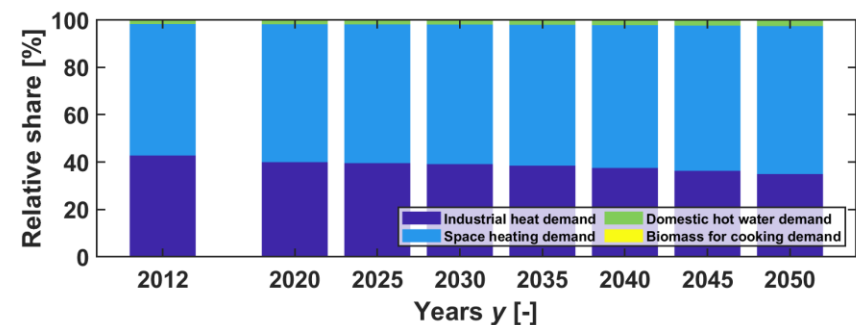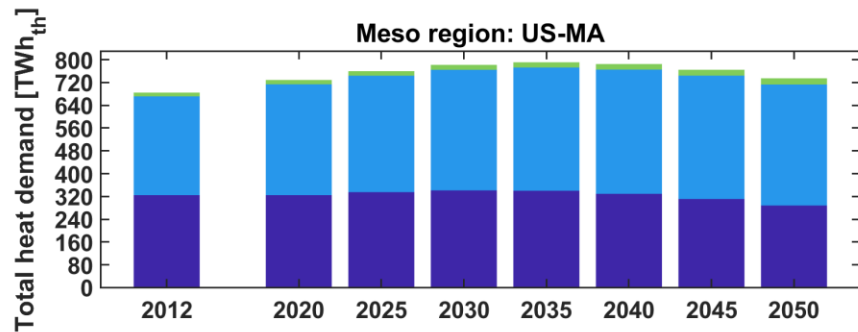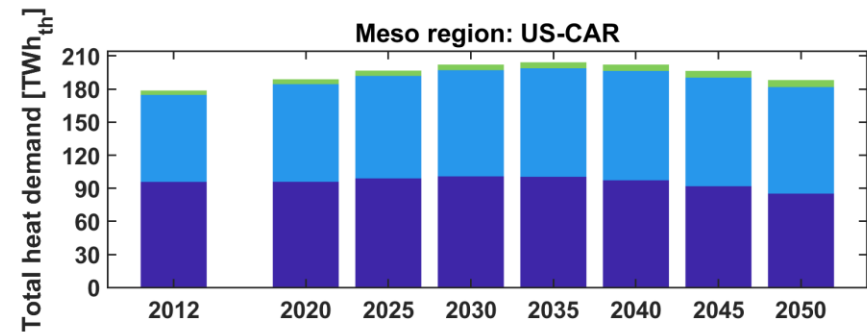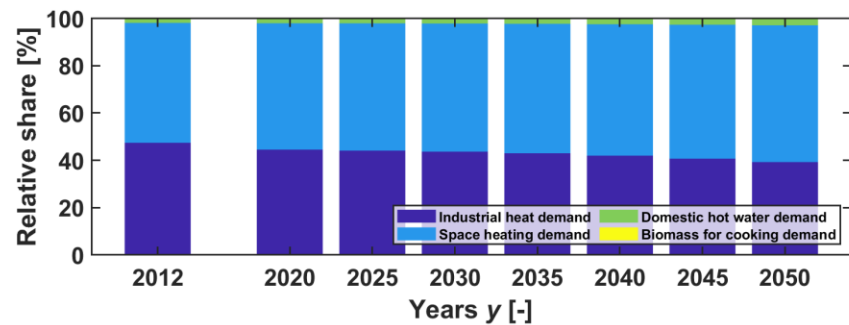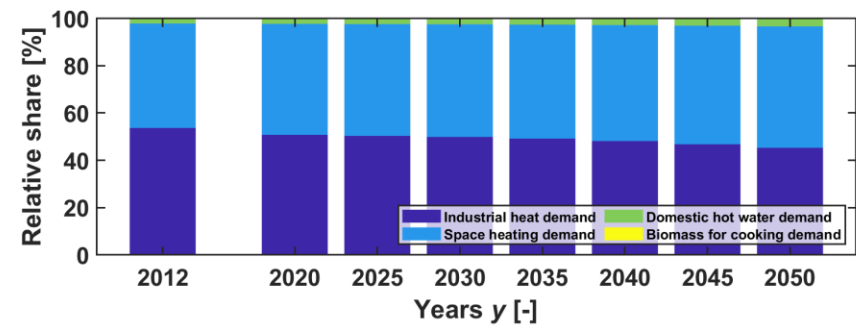

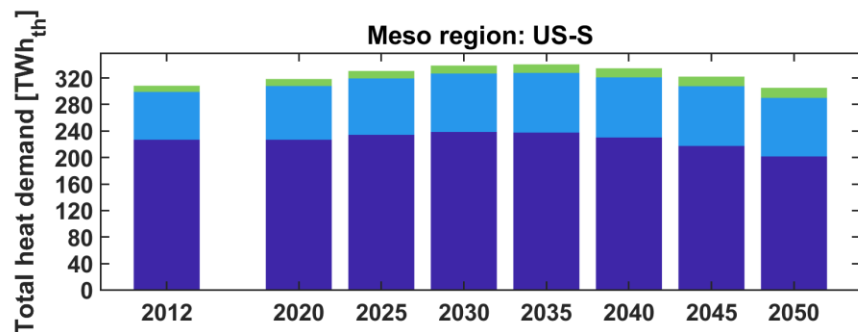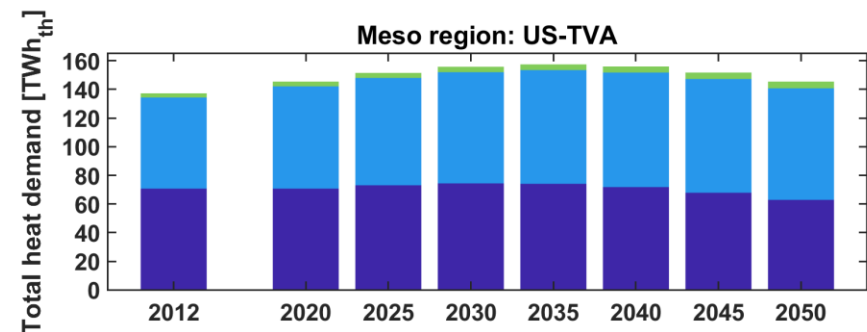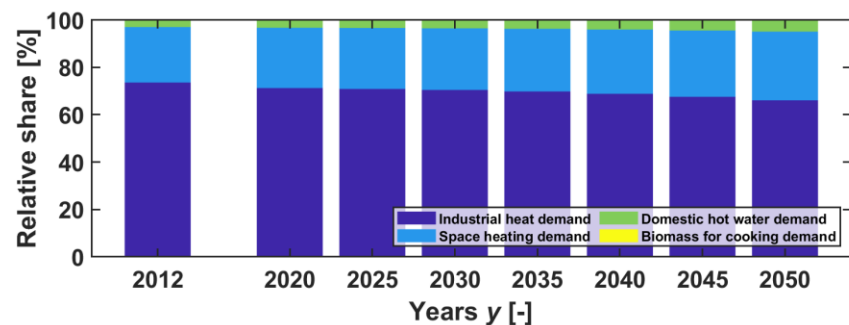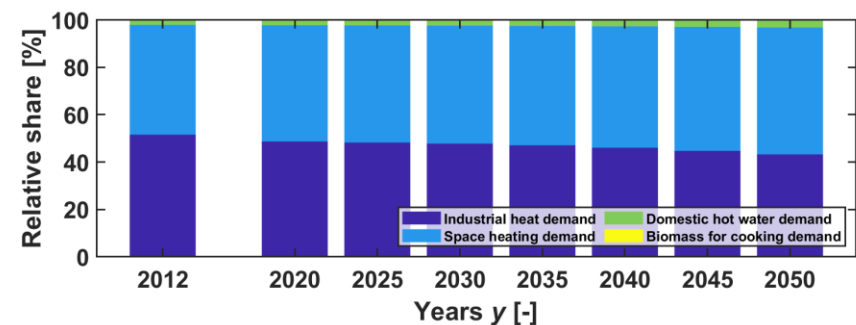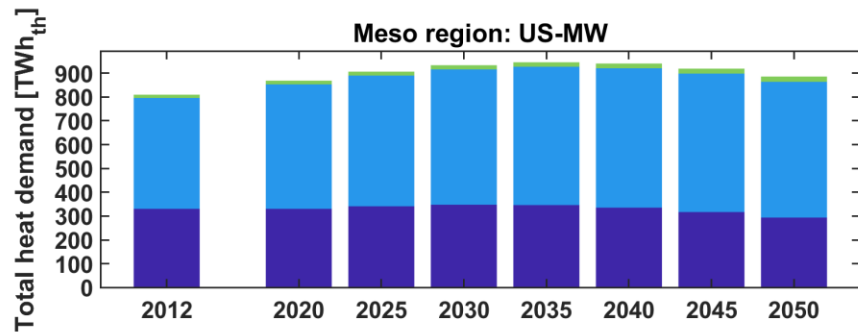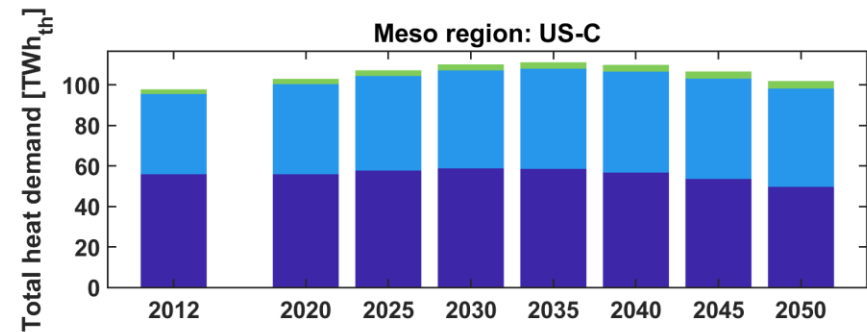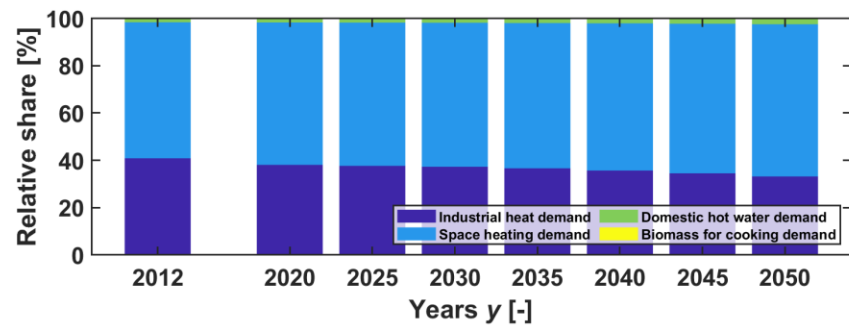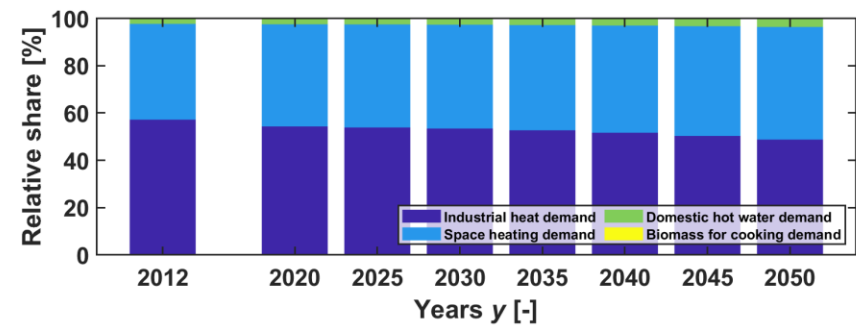

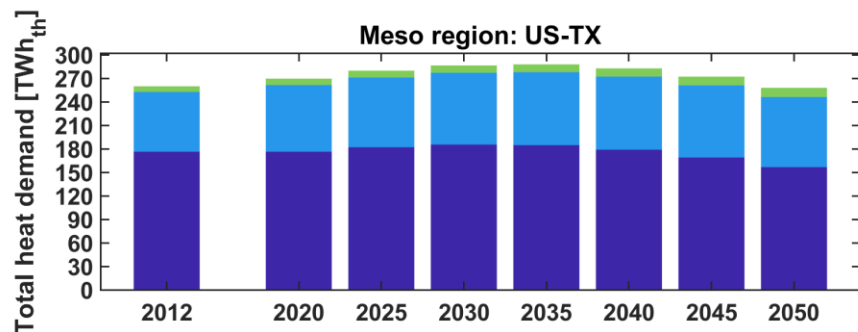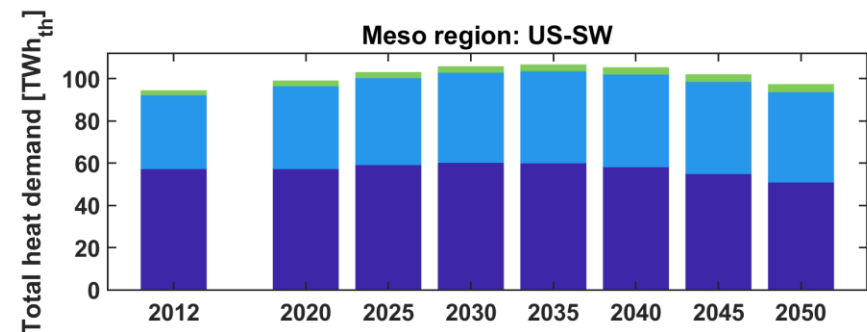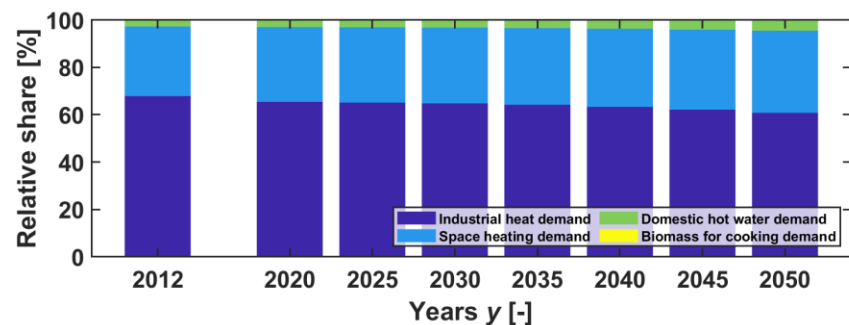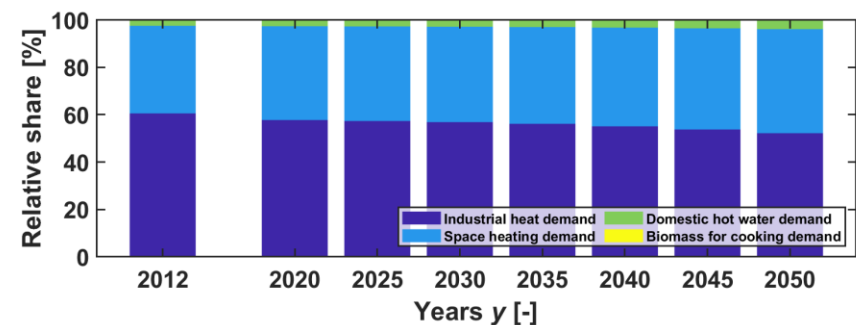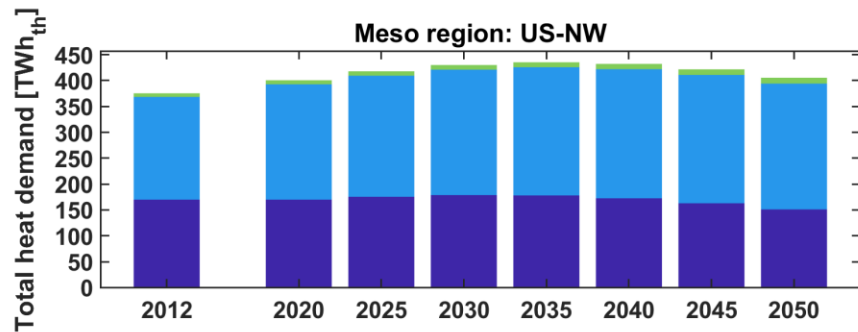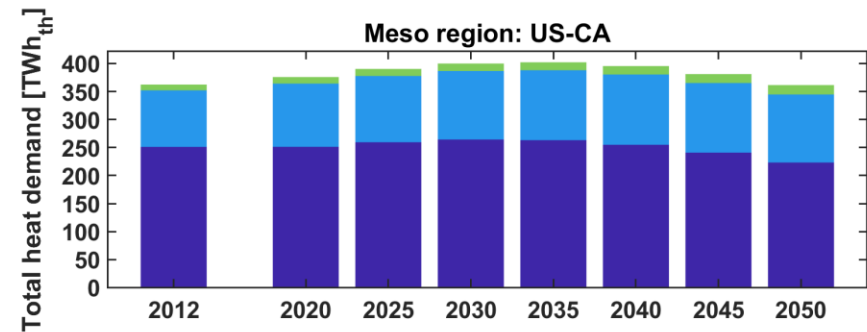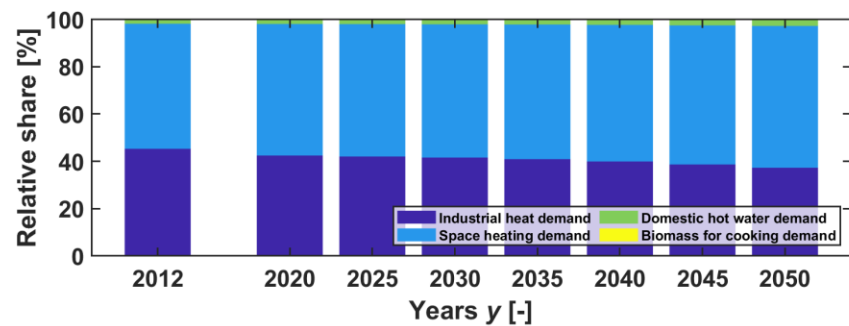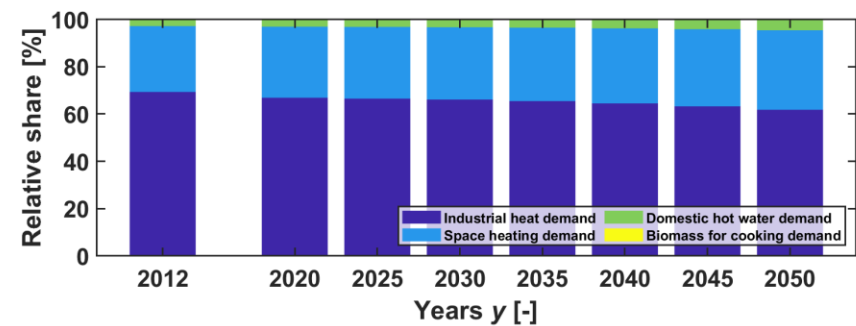

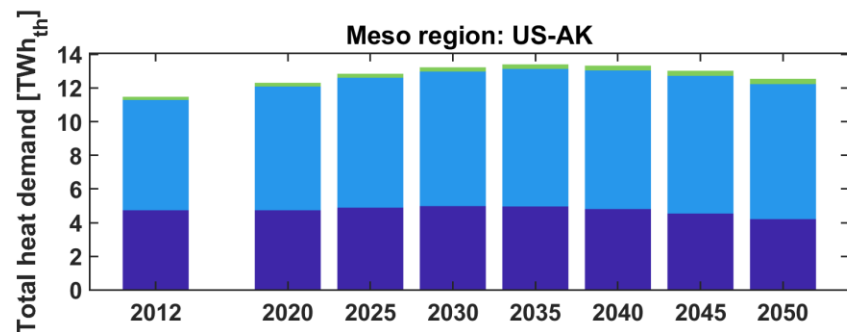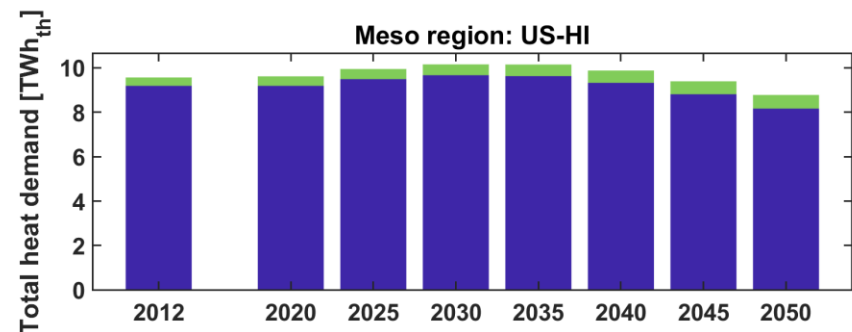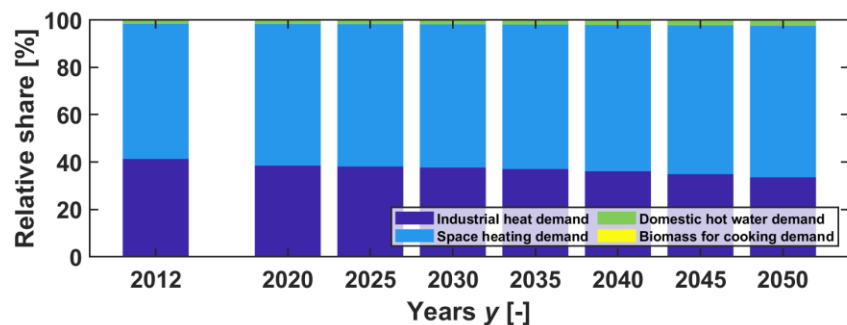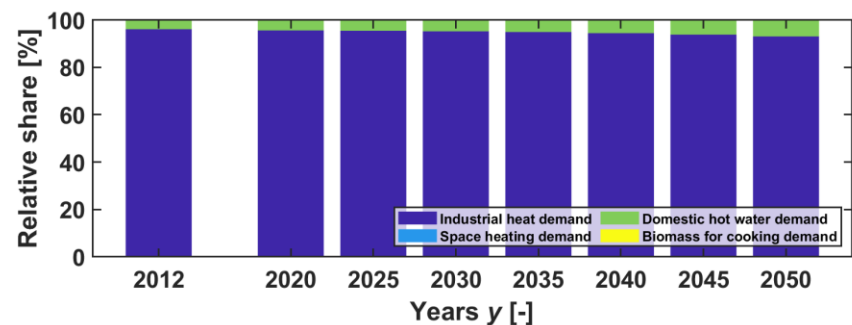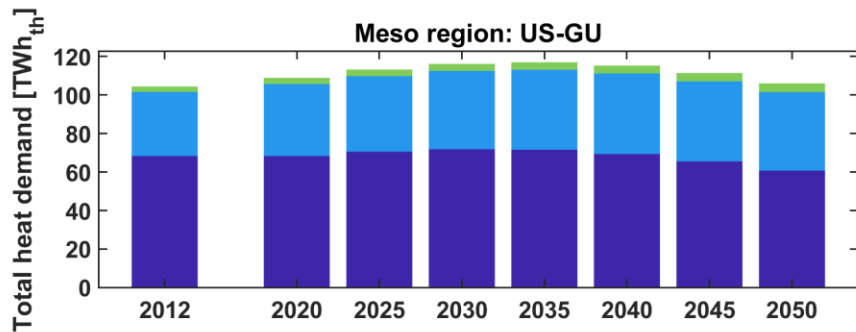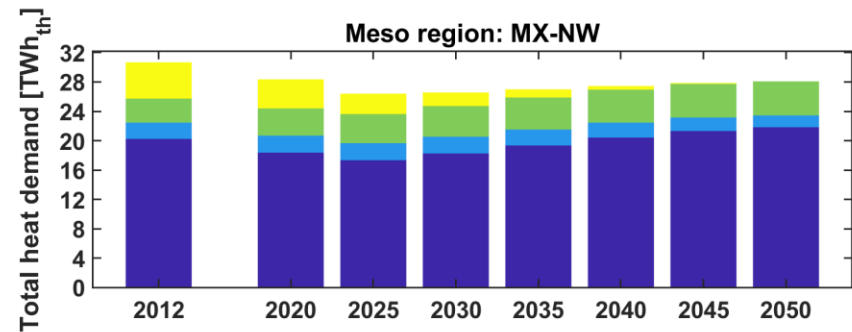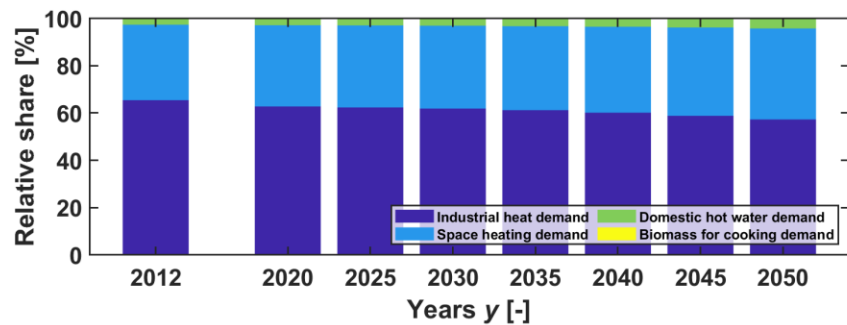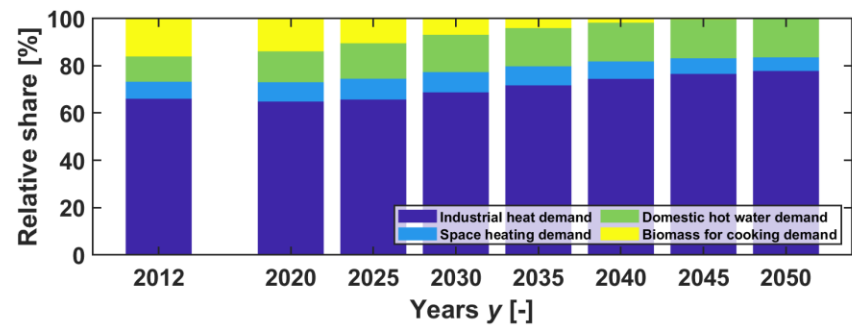

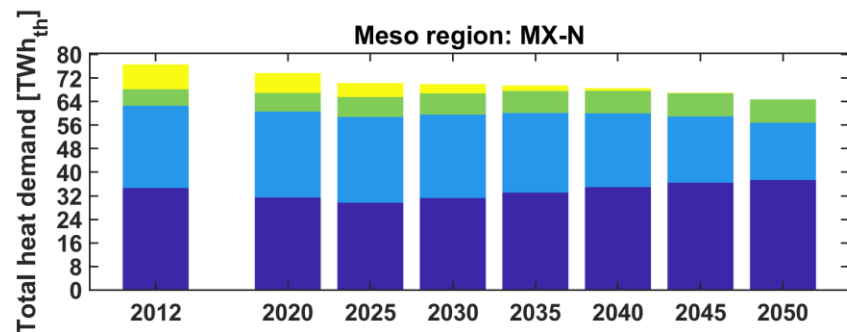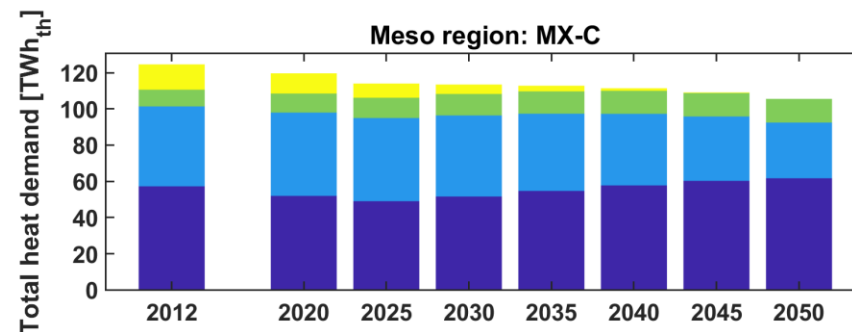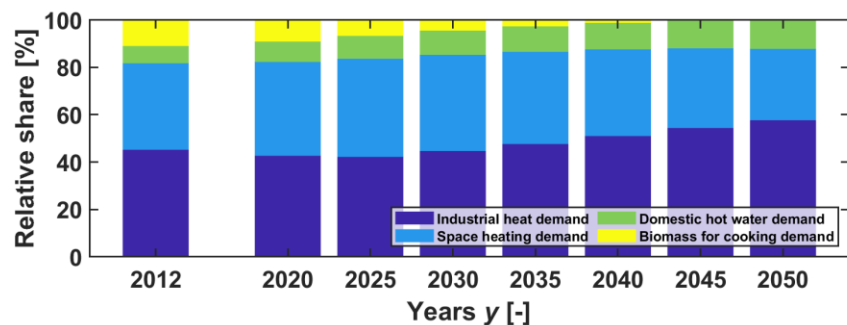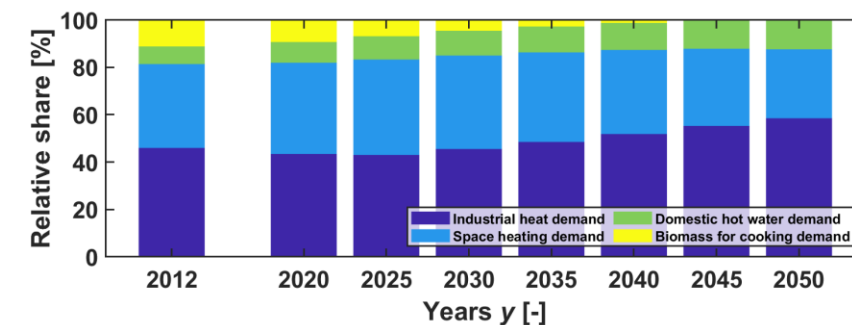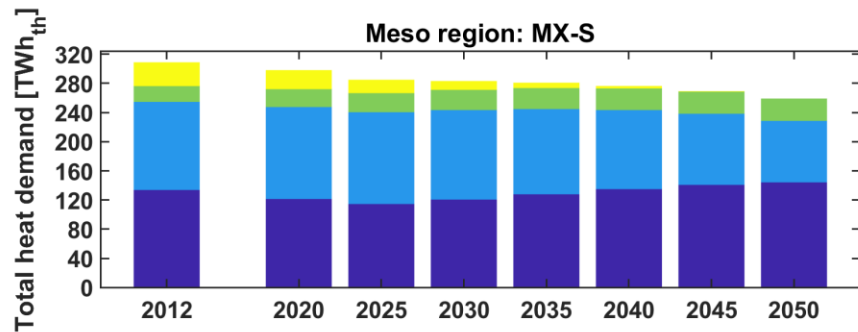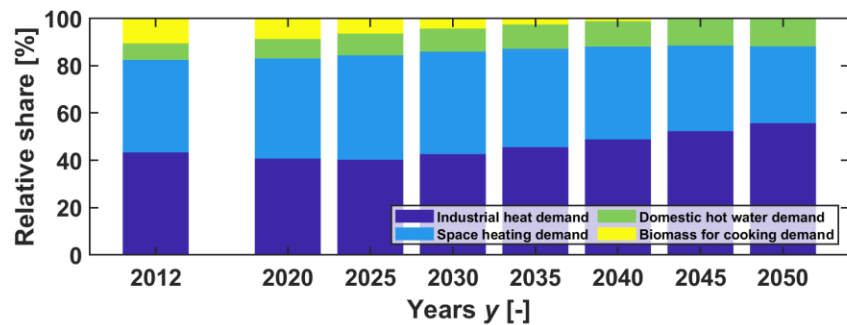

Supplement: s1 [file s1]
