# Supplementary material
Source: MDPI journal article supplement (https://www.mdpi.com/1996-1073/14/13/3814)

## **Global-local heat demand development for the energy transition time frame up to 2050**

Dominik Keiner <sup>1,\*</sup>, Larissa D.S.N.S. Barbosa <sup>2</sup>, Dmitrii Bogdanov <sup>1</sup>, Arman Aghahosseini <sup>1</sup>, Ashish Gulagi <sup>1</sup>, Solomon Oyewo <sup>1</sup>, Michael Child <sup>1</sup>, Siavash Khalili <sup>1</sup> and Christian Breyer <sup>1,\*</sup>

<sup>1</sup> School of Energy Systems, LUT University, Yliopistonkatu 34, 53850 Lappeenranta, Finland

<sup>2</sup> Luiz De Queiroz College of Agriculture, University of São Paulo, Piracicaba, São Paulo, Brazil

\* Correspondence: dominik.keiner@lut.fi (D.K.); christian.breyer@lut.fi (C.B.)

### **Part 2: Global maps of heat demand results for SHD, DHW, IHD and BCH**

## Part 2.1. Global maps of space heating demand SHD from 2012 until 2050.

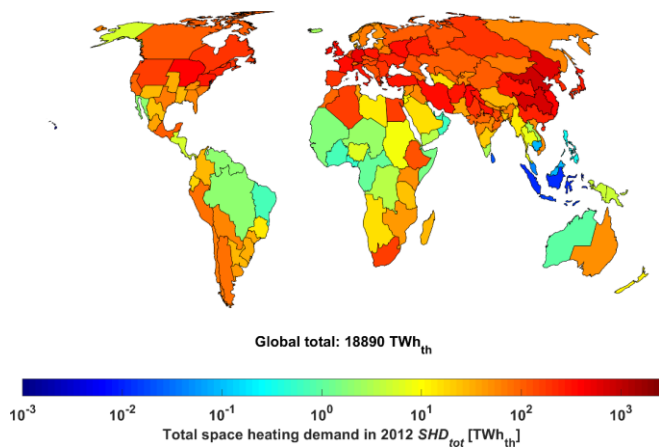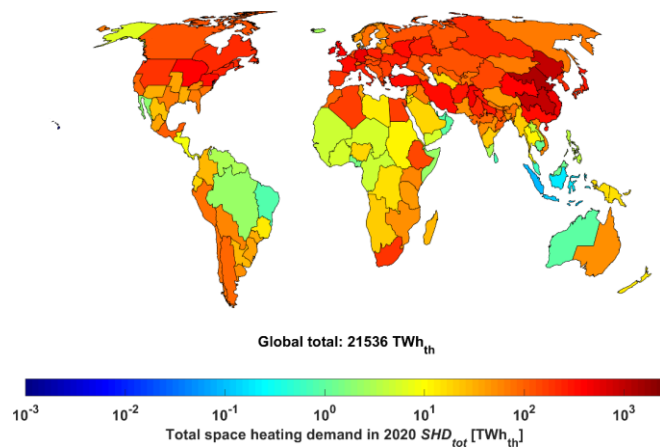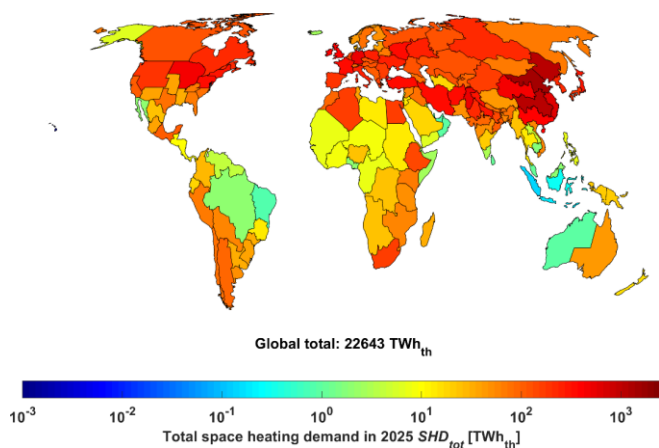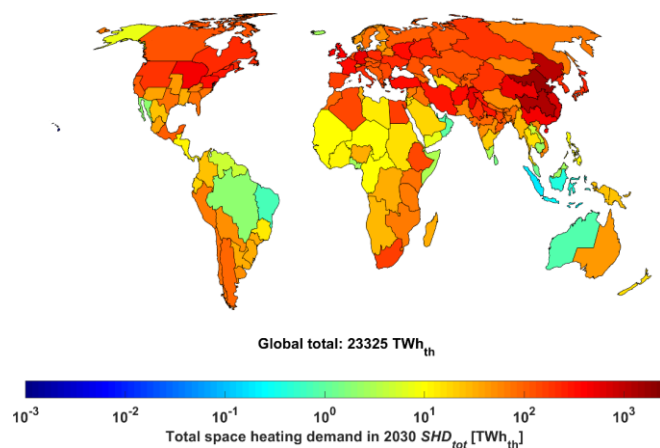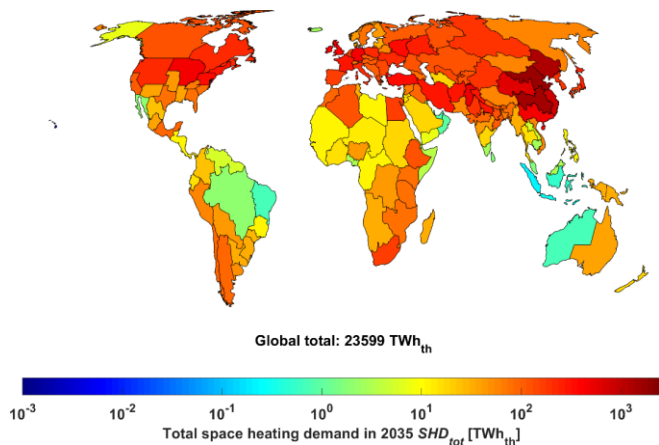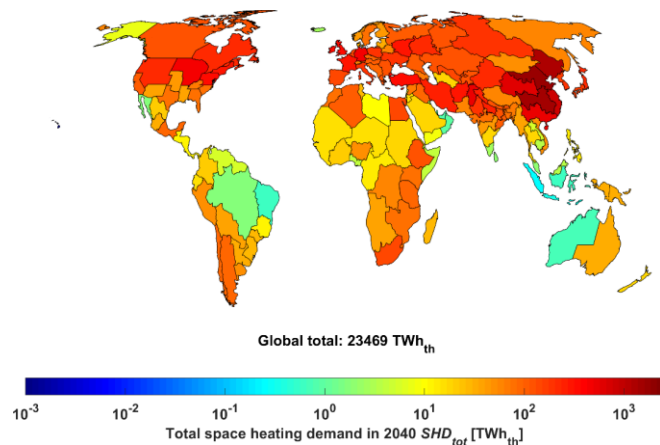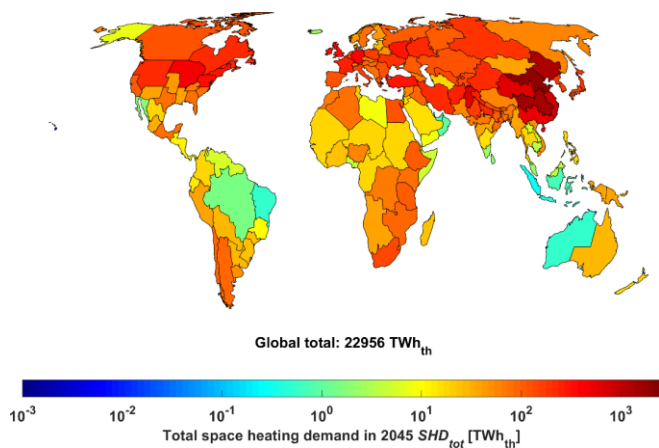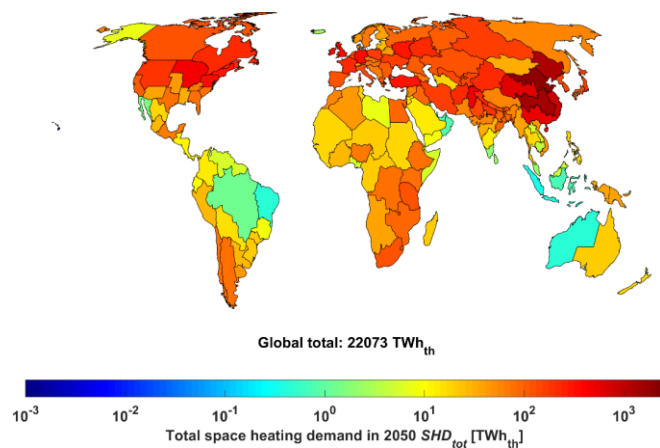

## Part 2.2. Global maps of domestic hot water demand DHW from 2012 until 2050.

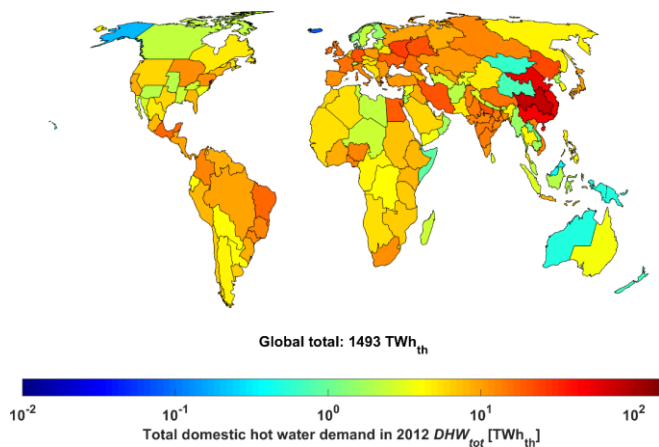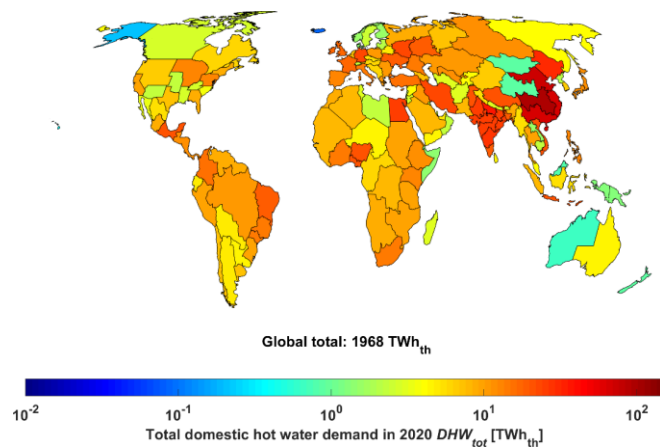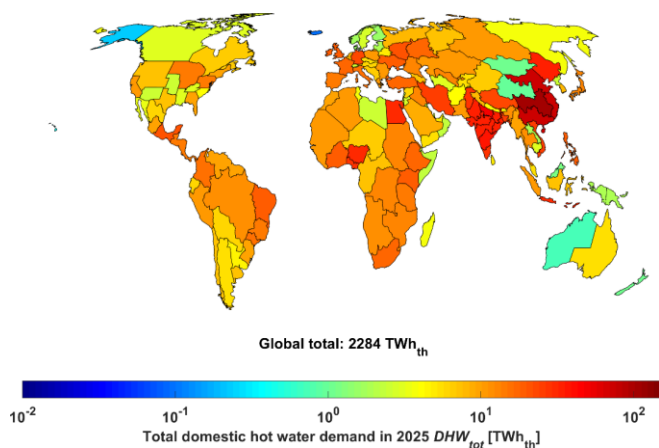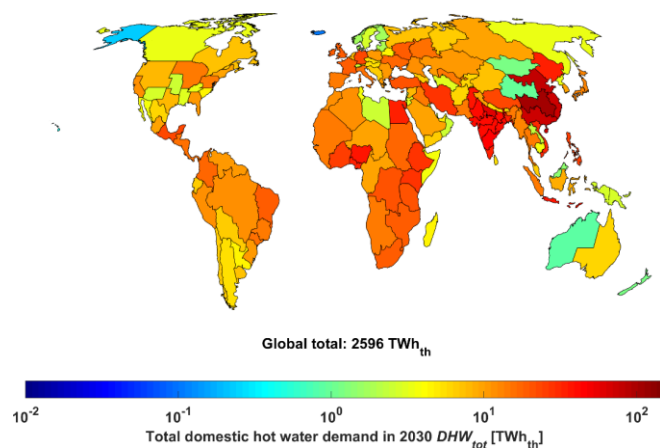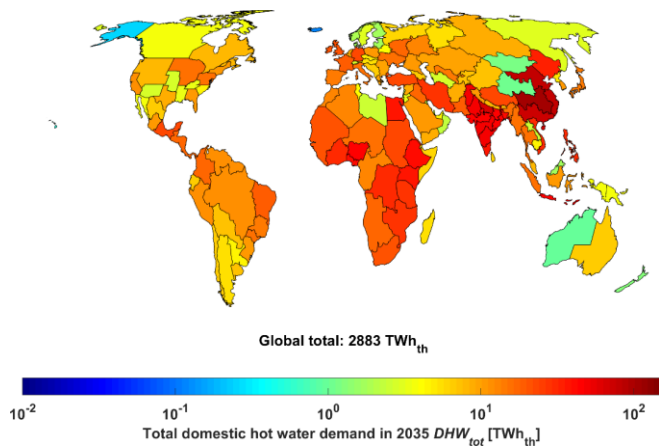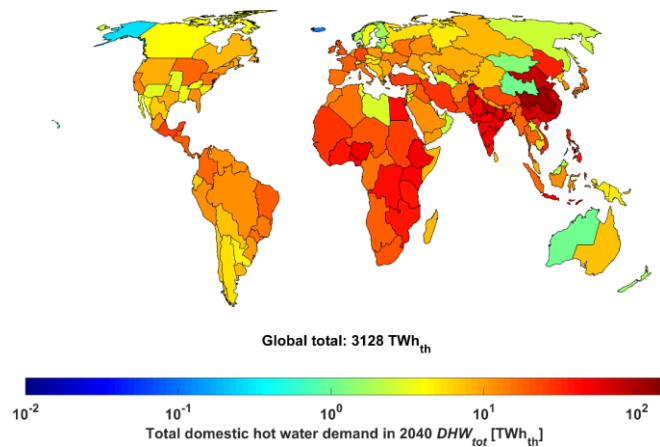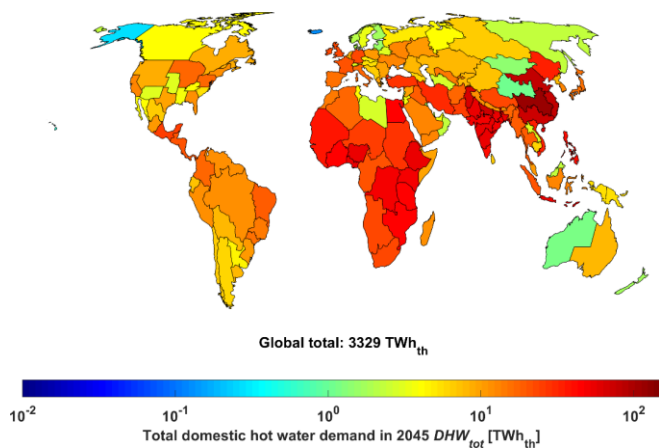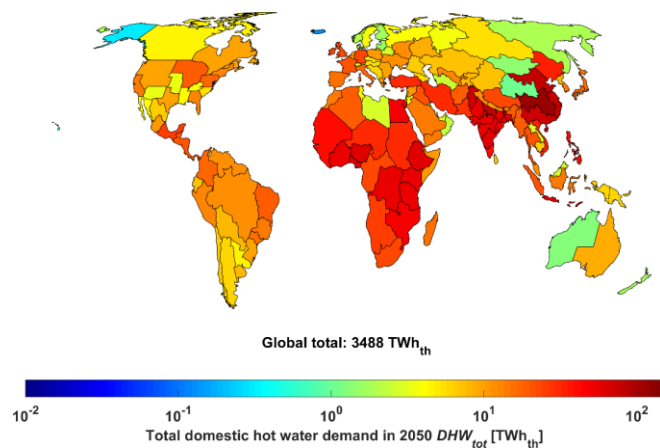

### Part 2.3. Global maps of the industrial heat demand IHD from 2012 until 2050.

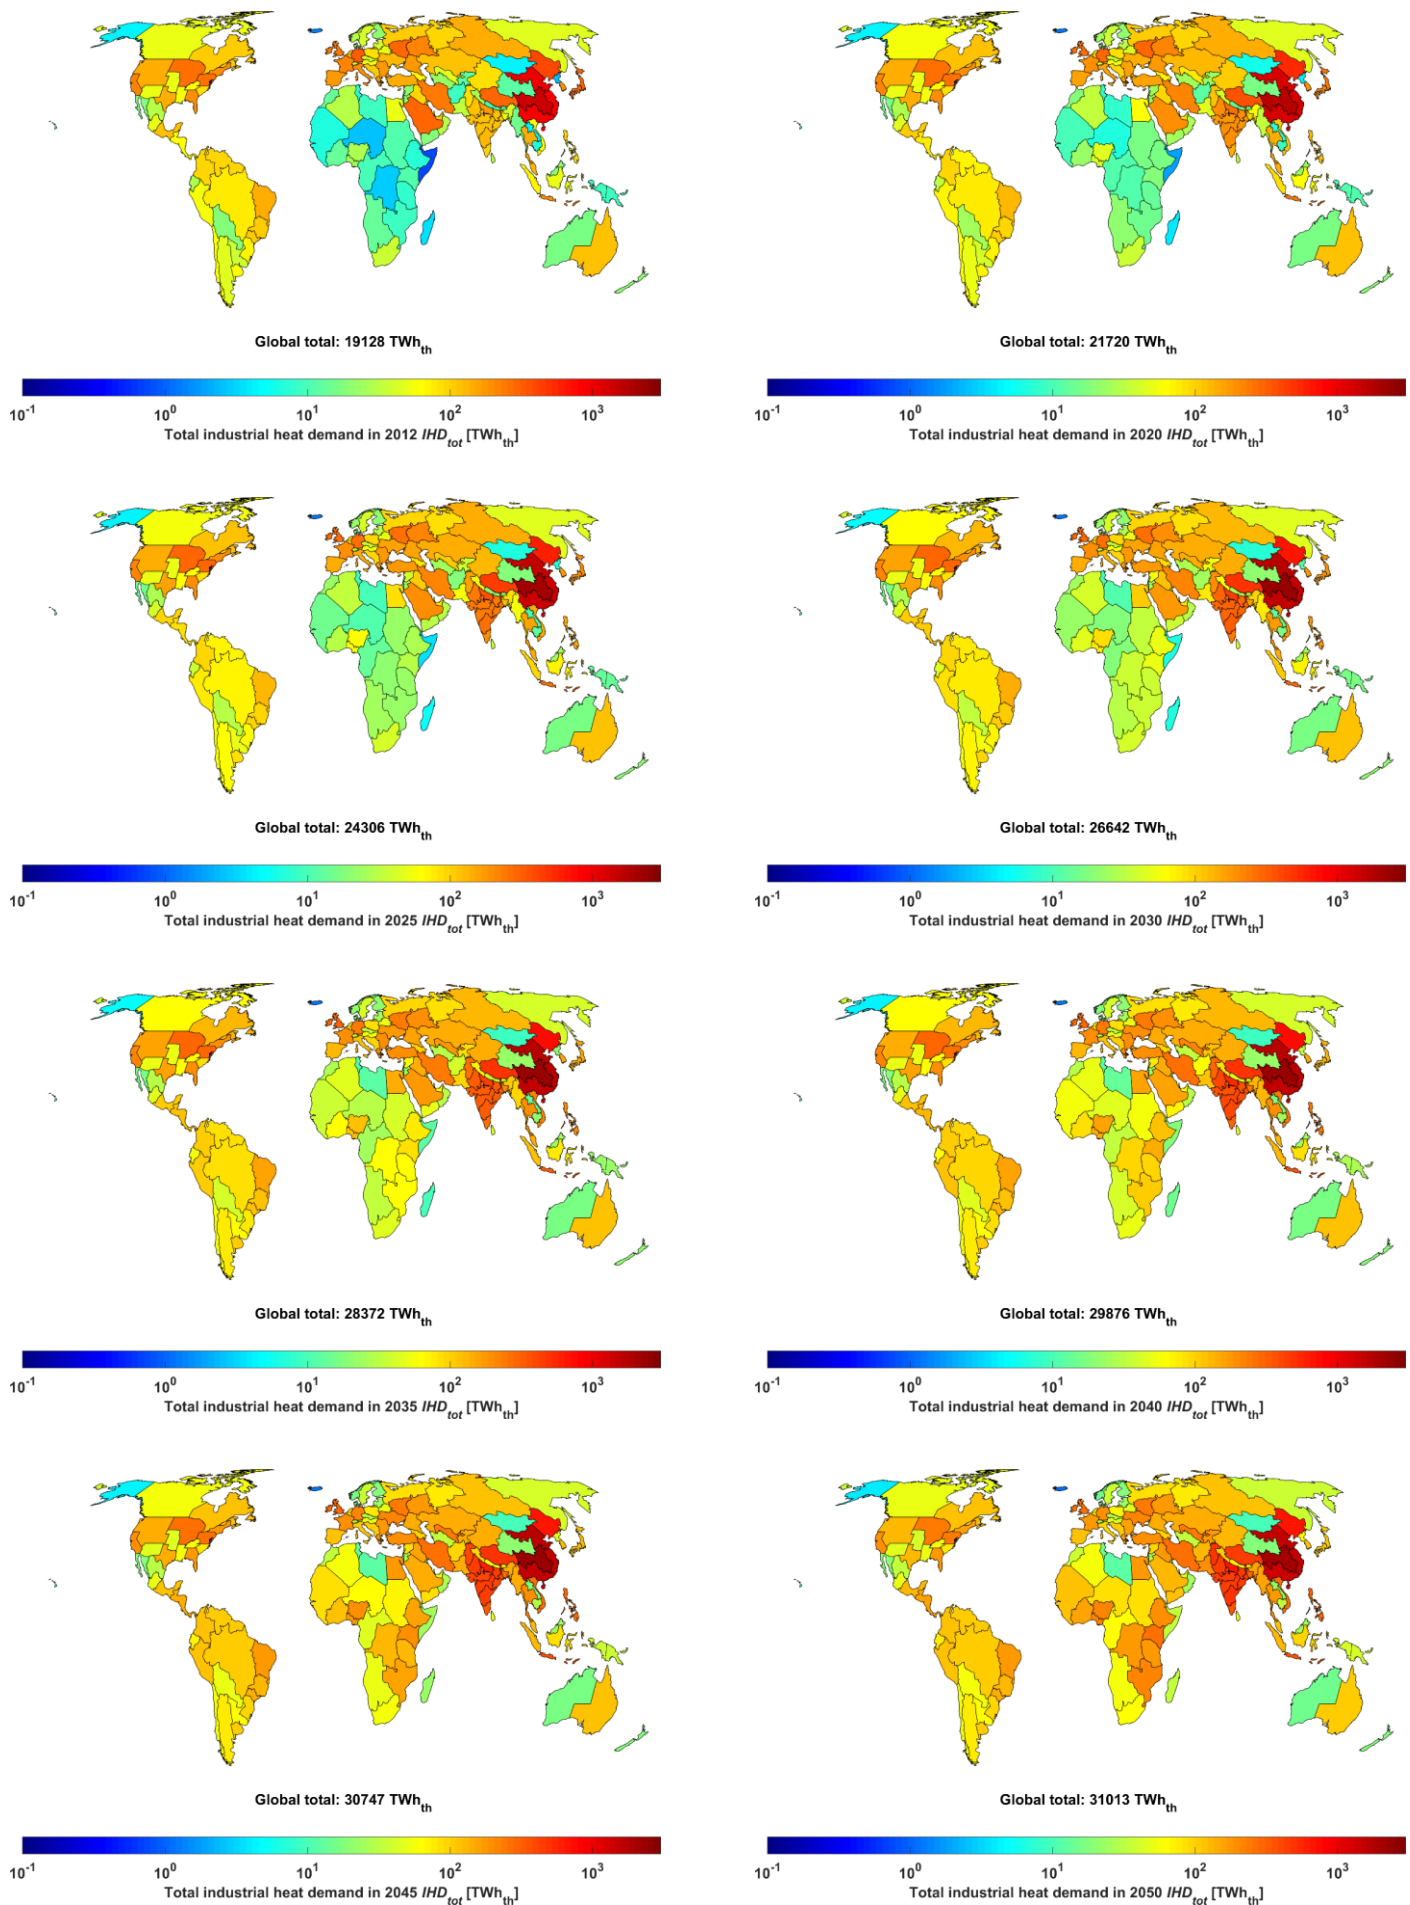

## Part 2.4. Global maps of the biomass for cooking heat demand BCH from 2012 until 2050.

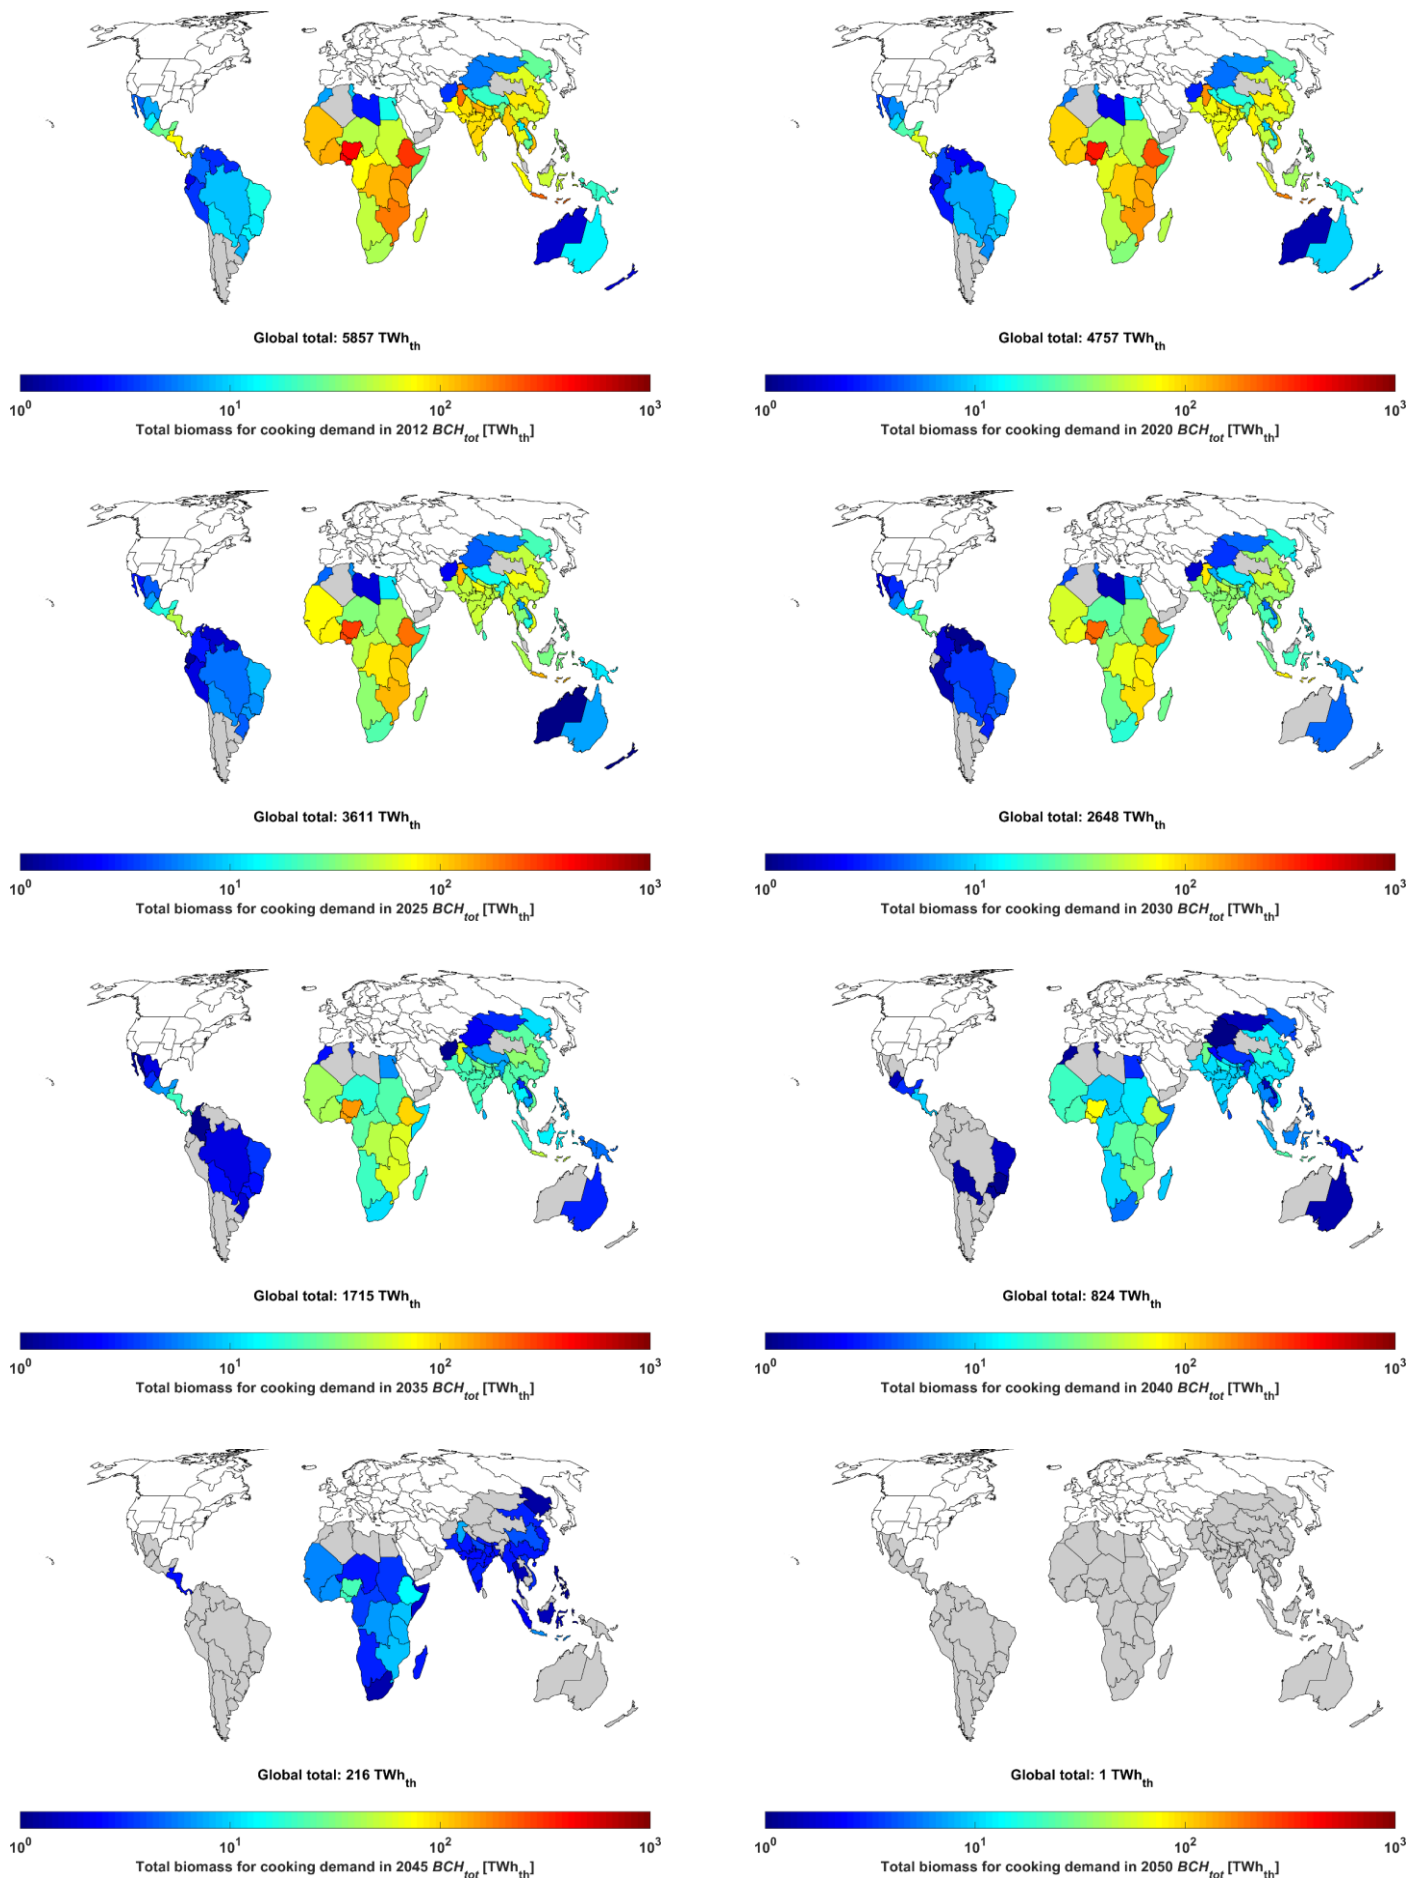

Supplement: s1 [file s1]
